# Supplementary material for: Synthesis and Anti-Angiogenic Activity of Novel c(RGDyK) Peptide-Based JH-VII-139-1 Conjugates
Source: MDPI journal article supplement (doi:10.3390/pharmaceutics15020381), 2023-01-22
Supplement: s1 [file s1]

## Supplementary Material

# Synthesis and Anti-Angiogenic Activity of Novel c(RGDyK) Peptide-Based JH-VII-139-1 Conjugates

George Leonidis <sup>1</sup>, Anastasia Koukiali <sup>1</sup>, Ioanna Sigala <sup>1</sup>, Katerina Tsimaratou <sup>2</sup>, Dimitris Beis <sup>2</sup>, Thomas Giannakouros <sup>1</sup>, Eleni Nikolakaki <sup>1</sup> and Vasiliki Sarli <sup>1,\*</sup>

<sup>1</sup> Department of Chemistry, Aristotle University of Thessaloniki, University Campus, 54124 Thessaloniki, Greece

<sup>2</sup> Zebrafish Disease Model Laboratory, Biomedical Research Foundation Academy of Athens, 11527 Athens, Greece

\* Correspondence: sarli@chem.auth.gr

### Supporting Info

|                                                                     |     |
|---------------------------------------------------------------------|-----|
| LC/ESI-MS, HPLC parameters and method development                   | S3  |
| <sup>1</sup> H-NMR and <sup>13</sup> C-NMR spectra for 2            | S5  |
| LC/ESI-MS analysis of 2                                             | S6  |
| <sup>1</sup> H-NMR and <sup>13</sup> C-NMR spectra for 3            | S7  |
| <sup>1</sup> H-NMR and <sup>13</sup> C-NMR spectra for 5            | S8  |
| <sup>1</sup> H-NMR and <sup>13</sup> C-NMR spectra for 6a           | S9  |
| LC/ESI-MS analysis of 6a                                            | S10 |
| <sup>1</sup> H-NMR and <sup>13</sup> C-NMR spectra for 6b           | S11 |
| <sup>1</sup> H-NMR and <sup>13</sup> C-NMR spectra for 7            | S12 |
| LC/ESI-MS analysis of 7                                             | S13 |
| <sup>1</sup> H-NMR and <sup>13</sup> C-NMR spectra for 8            | S14 |
| LC/ESI-MS analysis of 8                                             | S15 |
| <sup>1</sup> H-NMR and <sup>13</sup> C-NMR spectra for 9            | S16 |
| LC/ESI-MS analysis of 9                                             | S17 |
| <sup>1</sup> H-NMR and <sup>13</sup> C-NMR spectra for 10           | S18 |
| LC/ESI-MS analysis of 10                                            | S19 |
| <sup>1</sup> H-NMR spectra for 12 and 13                            | S20 |
| <sup>1</sup> H-NMR and <sup>13</sup> C-NMR spectra for JH-VII-139-1 | S21 |
| ESI-HRMS analysis of JH-VII-139-1                                   | S22 |
| <sup>1</sup> H-NMR spectrum for 16                                  | S23 |
| <sup>1</sup> H-NMR and <sup>13</sup> C-NMR spectra for 17           | S24 |

|                                                               |     |
|---------------------------------------------------------------|-----|
| LC/ESI-MS analysis of 17                                      | S25 |
| <sup>1</sup> H-NMR and <sup>13</sup> C-NMR spectra for geo75  | S26 |
| LC/ESI-MS analysis of geo75                                   | S27 |
| <sup>1</sup> H-NMR and <sup>13</sup> C-NMR spectra for 20     | S28 |
| LC/ESI-MS analysis for 20                                     | S29 |
| <sup>1</sup> H-NMR and <sup>13</sup> C-NMR spectra for geo77  | S30 |
| LC/ESI-MS analysis of geo77                                   | S31 |
| <sup>1</sup> H-NMR and <sup>13</sup> C-NMR spectra for 22     | S32 |
| <sup>1</sup> H-NMR and <sup>13</sup> C-NMR spectra for 23     | S33 |
| ESI-MS analysis of 23                                         | S34 |
| <sup>1</sup> H-NMR and <sup>13</sup> C-NMR spectra for geo85  | S35 |
| LC/ESI-MS analysis of geo85                                   | S36 |
| <sup>1</sup> H-NMR and <sup>13</sup> C-NMR spectra for 24     | S37 |
| LC/ESI-MS analysis of 24                                      | S38 |
| <sup>1</sup> H-NMR and <sup>13</sup> C-NMR spectra for geo105 | S39 |
| LC/ESI-MS analysis of geo105                                  | S40 |
| <sup>1</sup> H-NMR and <sup>13</sup> C-NMR spectra for geo107 | S41 |
| LC/ESI-MS analysis of geo107                                  | S42 |
| <sup>1</sup> H-NMR spectra for 28 and 29                      | S43 |
| LC/ESI-MS analysis of 29                                      | S44 |
| <sup>1</sup> H-NMR spectra for geo106                         | S45 |
| LC/ESI-MS analysis of 106                                     | S46 |
| Chemostability Studies                                        | S47 |
| In vitro kinase inhibition assay                              | S48 |

## LC/ESI-MS, HPLC parameters and method development

LC-MS/HPLC: LC-20AD Shimadzu connected to Shimadzu LCMS-2010EV

HPLC column: Supelco discovery C18, 5µm 250 x 4.6mm

Flow rate: 0.4 mL/min

Column temperature: 26°C

UV detector: 254, 280 nm

MS detector: 1.65kV

### ➤ Method 1

gradient elution 90% H<sub>2</sub>O – 10% ACN (+0.1% formic acid) to 5% H<sub>2</sub>O - 95% ACN (+0.1% formic acid)

**Table S1.** Conditions for Method 1.

| time (min) | H <sub>2</sub> O (% v/v conc.) | ACN (% v/v conc.) |
|------------|--------------------------------|-------------------|
| 3          | 90                             | 10                |
| 22         | 15                             | 85                |
| 25         | 10                             | 90                |
| 29         | 10                             | 90                |
| 31         | 5                              | 95                |
| 37         | 5                              | 95                |

### ➤ Method 2

gradient elution 90% H<sub>2</sub>O – 10% ACN (+0.1% formic acid) to 10% H<sub>2</sub>O - 90% ACN (+0.1% formic acid)

**Table S2.** Conditions for Method 2.

| time (min) | H <sub>2</sub> O (% v/v conc.) | ACN (% v/v conc.) |
|------------|--------------------------------|-------------------|
| 3          | 90                             | 10                |
| 22         | 15                             | 85                |
| 25         | 10                             | 90                |
| 26         | 10                             | 90                |

### ➤ Method 3

gradient elution 90% H<sub>2</sub>O – 10% ACN (+0.1% formic acid) to 10% H<sub>2</sub>O - 90% ACN (+0.1% formic acid)

**Table S3.** Conditions for Method 3.

| time (min) | H <sub>2</sub> O (% v/v conc.) | ACN (% v/v conc.) |
|------------|--------------------------------|-------------------|
| 3          | 90                             | 10                |
| 22         | 15                             | 85                |
| 25         | 10                             | 90                |

|    |    |    |
|----|----|----|
| 29 | 10 | 90 |
|----|----|----|

➤ Method 4

gradient elution 90% H<sub>2</sub>O – 10% ACN (+0.1% formic acid) to 5% H<sub>2</sub>O - 95% ACN (+0.1% formic acid)

**Table S4.** Conditions for Method 4.

| time (min) | H <sub>2</sub> O (% v/v conc.) | ACN (% v/v conc.) |
|------------|--------------------------------|-------------------|
| 3          | 90                             | 10                |
| 22         | 15                             | 85                |
| 25         | 10                             | 90                |
| 29         | 10                             | 90                |
| 31         | 5                              | 95                |
| 33         | 5                              | 95                |

➤ Method 5

gradient elution 90% H<sub>2</sub>O – 10% ACN (+0.1% formic acid) to 10% H<sub>2</sub>O - 90% ACN (+0.1% formic acid)

**Table S5.** Conditions for Method 5.

| time (min) | H <sub>2</sub> O (% v/v conc.) | ACN (% v/v conc.) |
|------------|--------------------------------|-------------------|
| 3          | 90                             | 10                |
| 22         | 15                             | 85                |
| 25         | 10                             | 90                |

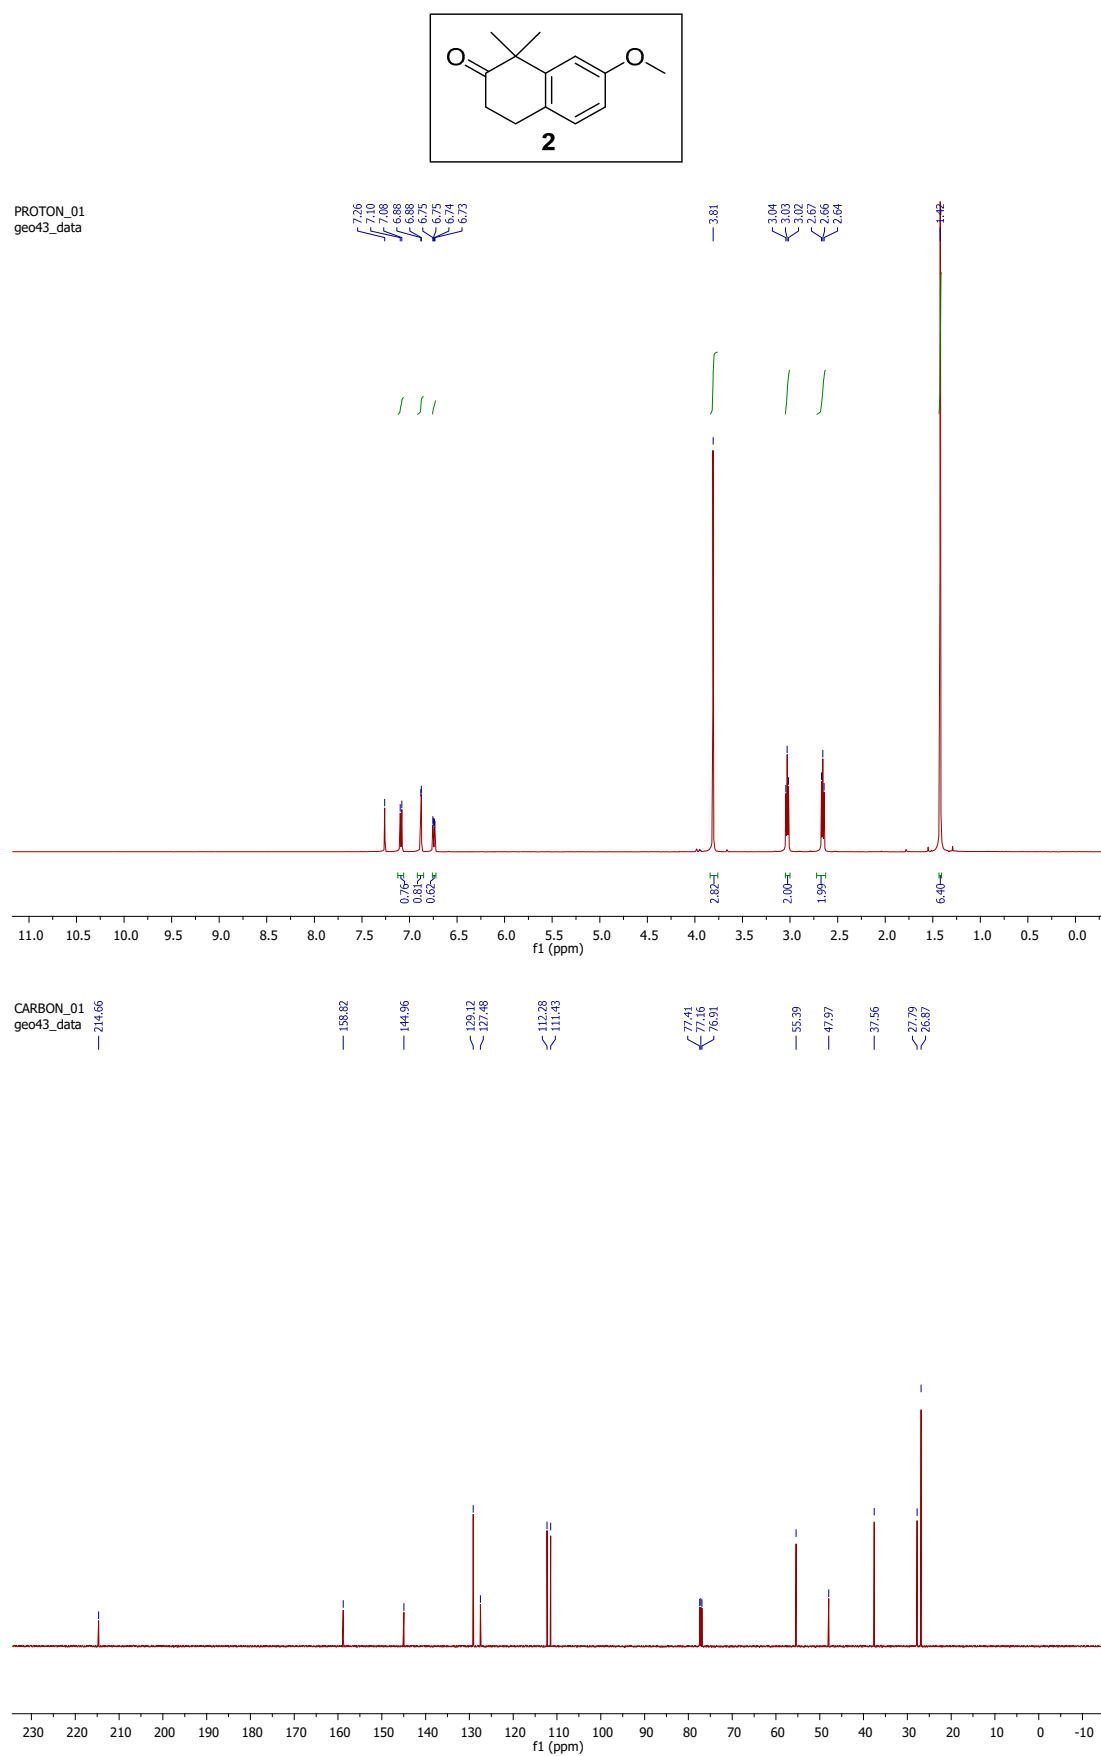

**Figure S1.**  $^1\text{H}$ -NMR and  $^{13}\text{C}$ -NMR spectra for compound **2**

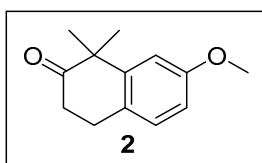

MeOH isocratic elution

Retention time: 8.6 m

area: 1536963 (absorbance units x minutes)

total area: 1622159 (absorbance units x minutes)

area %:  $(1536963/1622159) \times 100 = 94.7 \%$

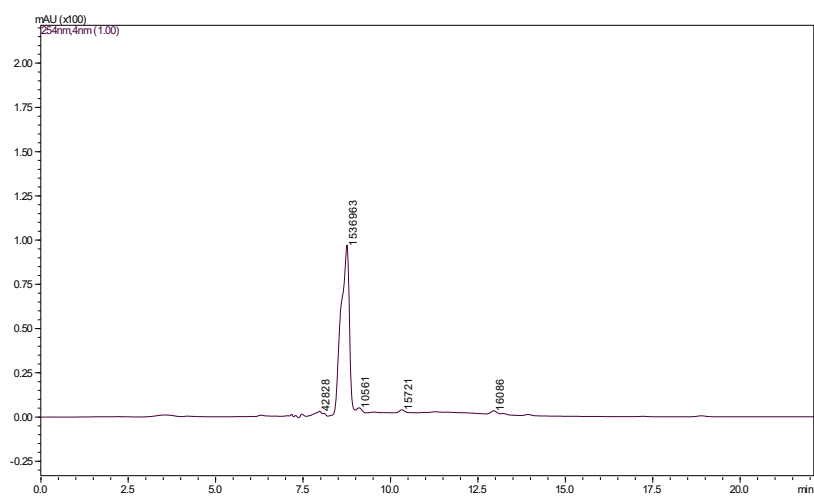

**Figure S2.** ESI-LCMS of compound **2** after column chromatography purification.

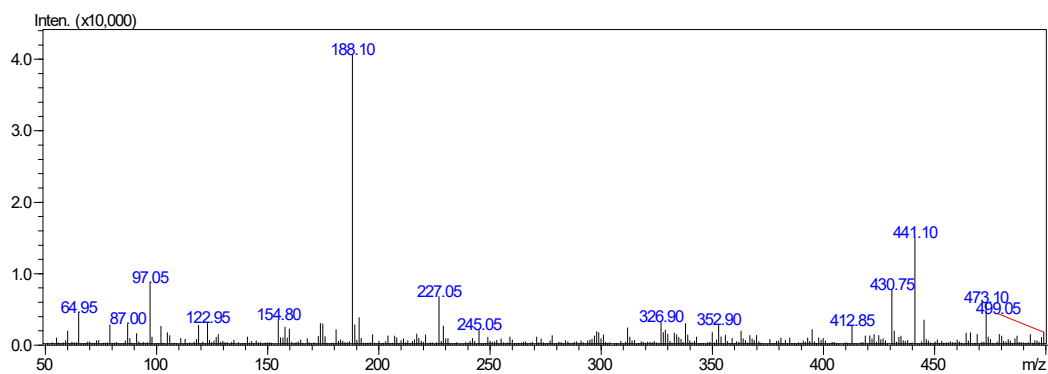

**Figure S3.** ESI-MS for **2**, positive mode:  $m/z$  calcd mass for  $C_{13}H_{16}O_2Na$   $[M+Na]^+ = 227.10$ , was found 227.05

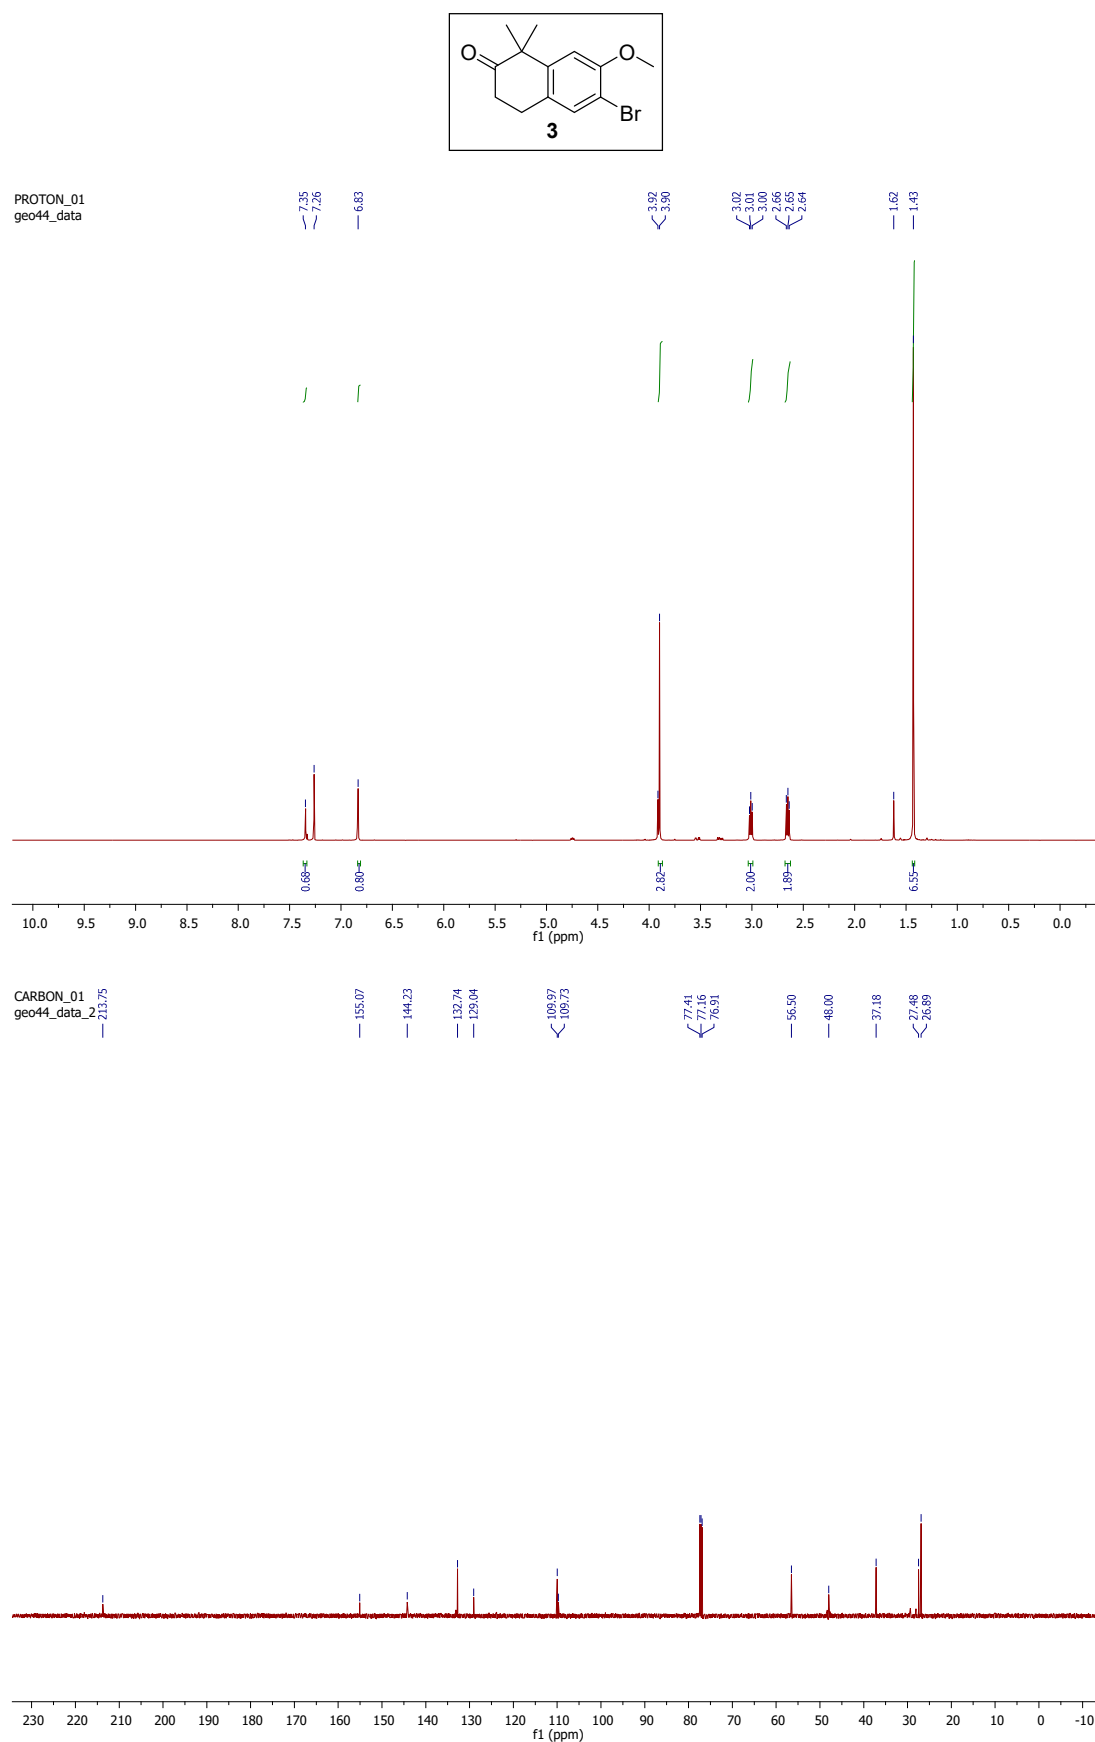

**Figure S4.**  $^1\text{H}$ -NMR and  $^{13}\text{C}$ -NMR spectra for compound **3**

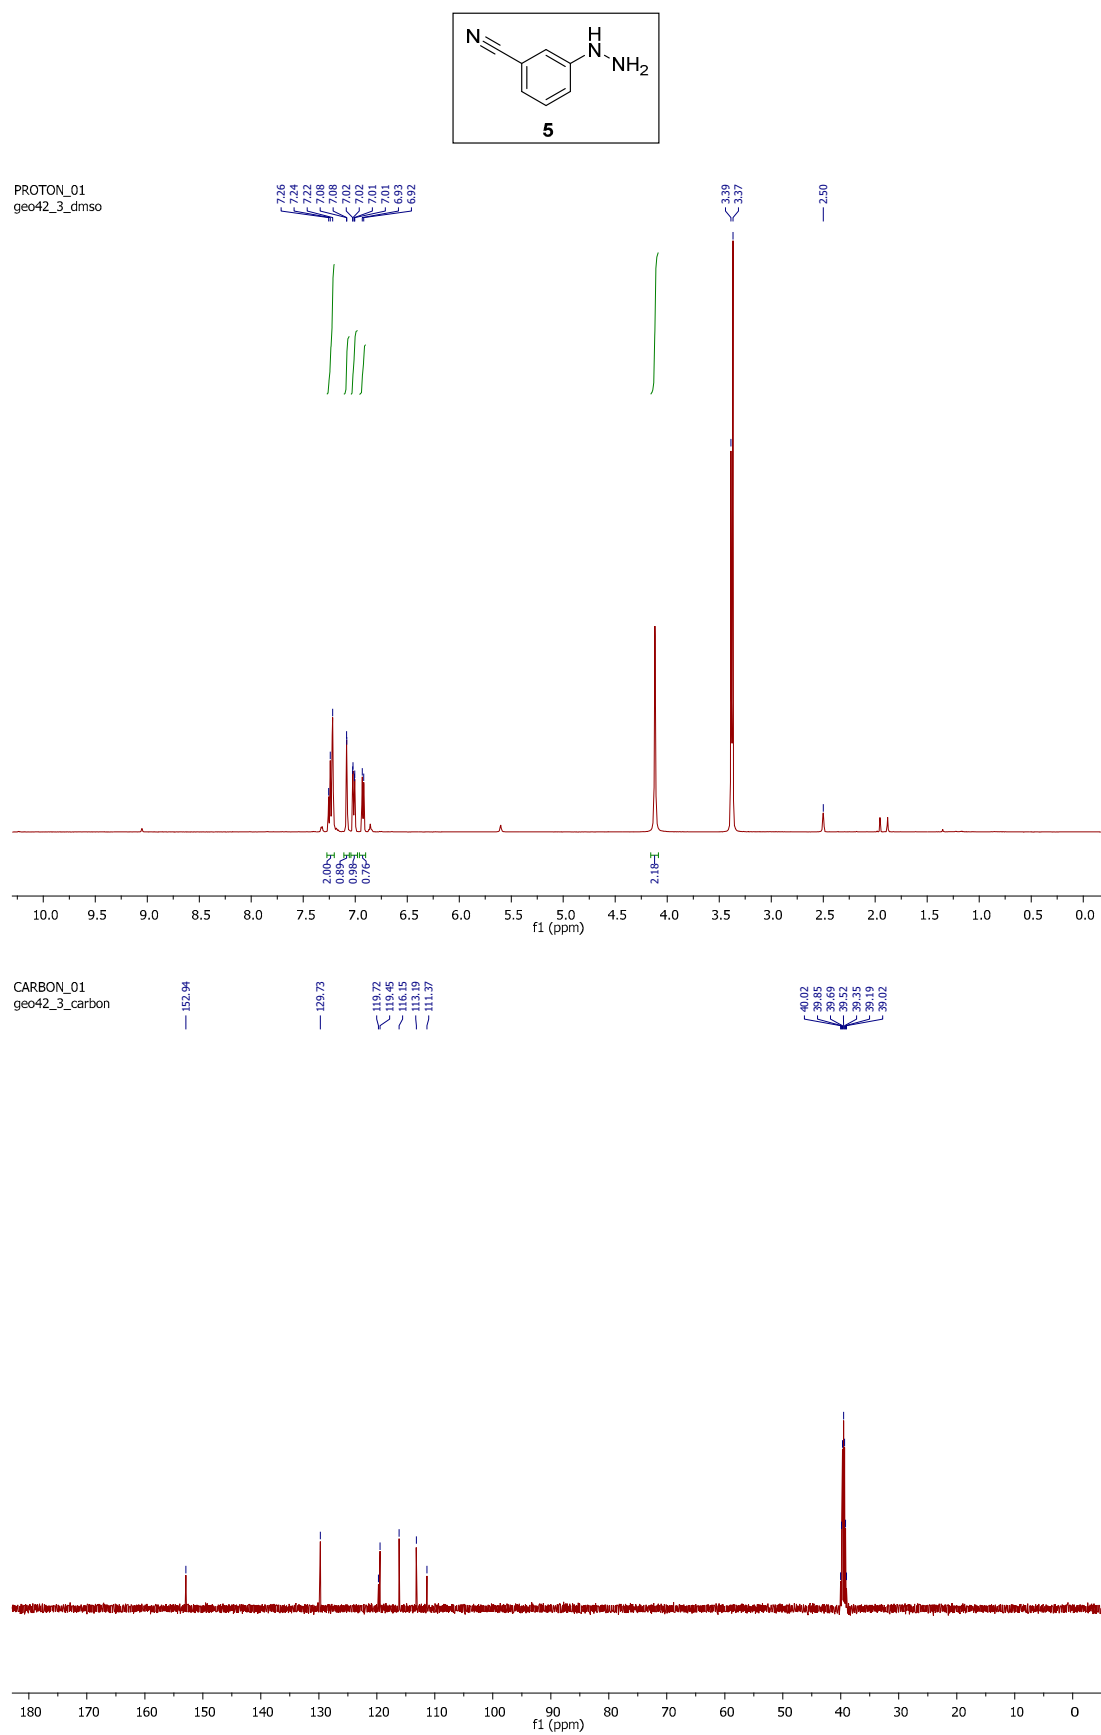

**Figure S5.**  $^1\text{H}$ -NMR and  $^{13}\text{C}$ -NMR spectra for compound **5**



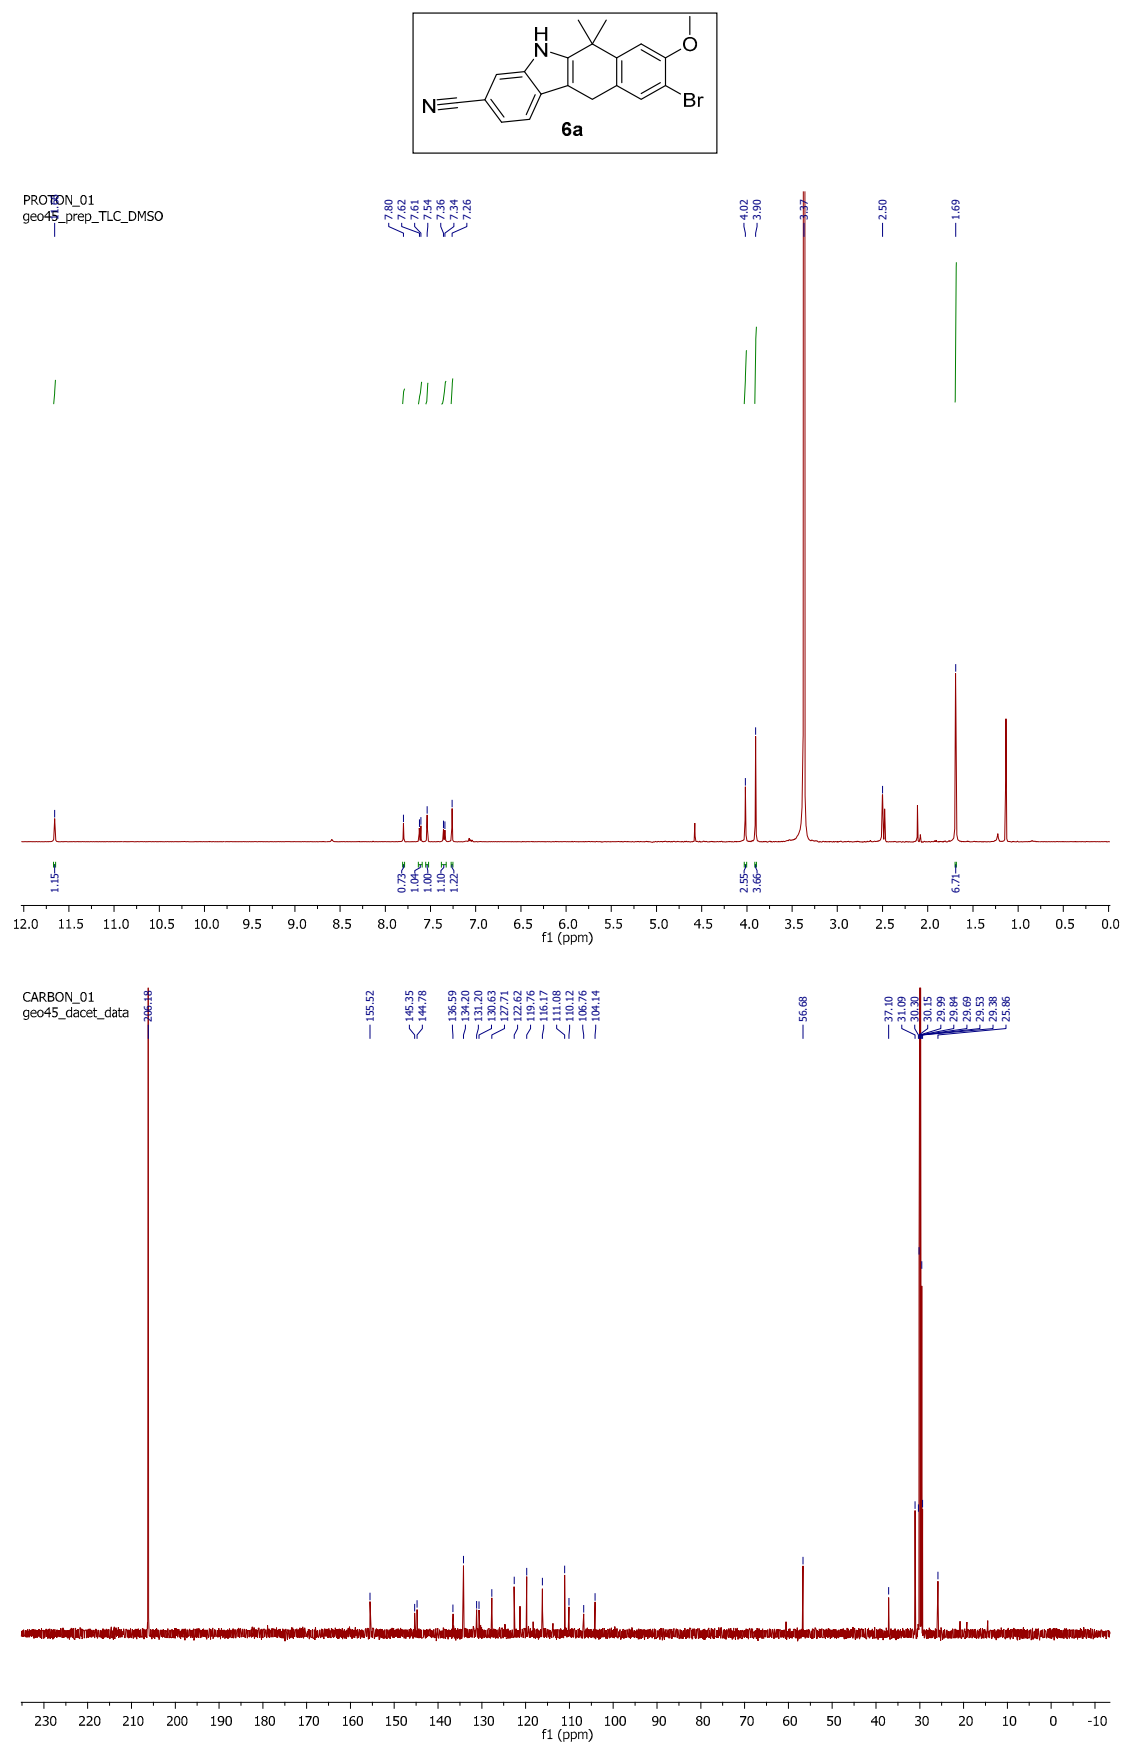

Figure S6. <sup>1</sup>H-NMR and <sup>13</sup>C-NMR spectra for compound **6a**

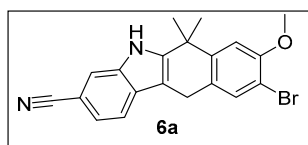

Method 1

Retention time: 32.8 m

area: 41951699 (absorbance units x minutes)

total area: 45555041 (absorbance units x minutes)

area %:  $(41951699/45555041) \times 100 = 92.1 \%$

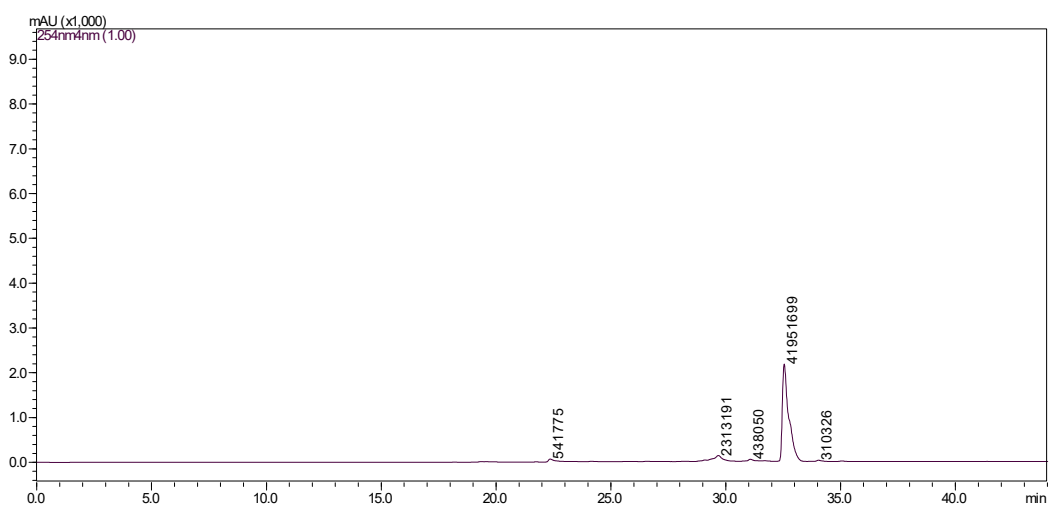

**Figure S7.** ESI-LCMS of compound **6a** after column chromatography purification

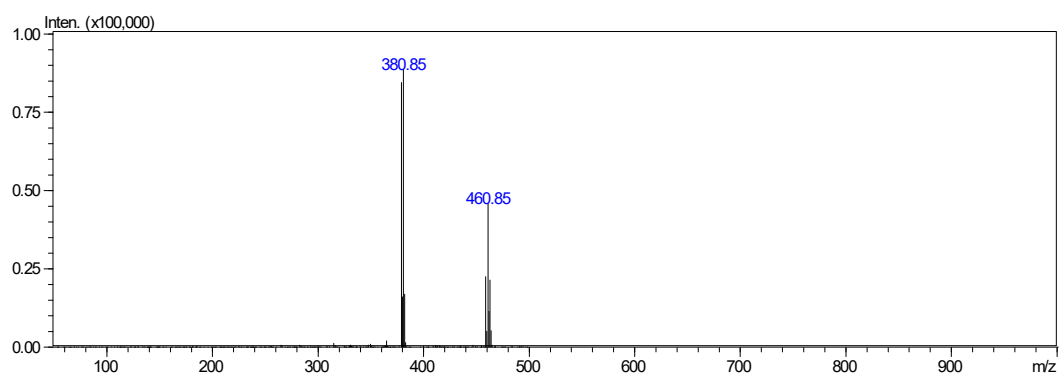

**Figure S8.** ESI-MS for **6a**, negative mode:  $m/z$  calcd mass for  $\text{C}_{20}\text{H}_{16}\text{BrN}_2\text{O}$   $[\text{M}-\text{H}]^- = 379.04$ , was found 380.85

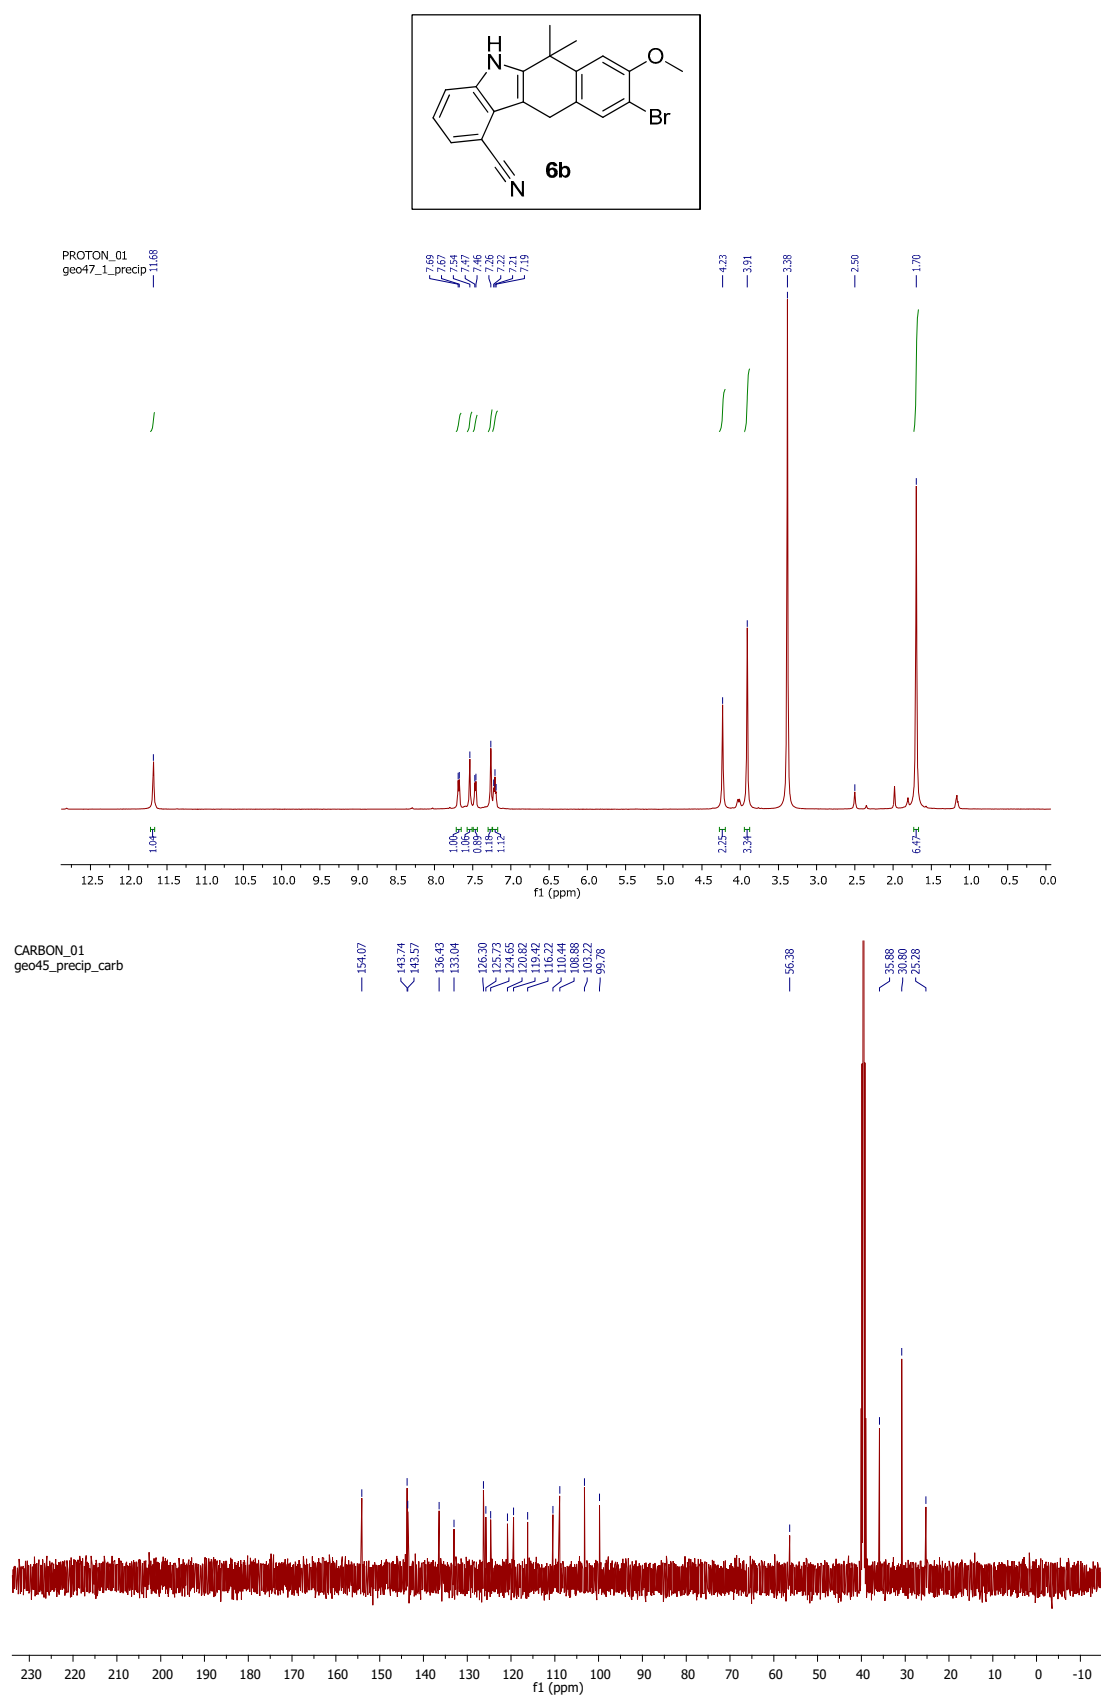

**Figure S9.** <sup>1</sup>H-NMR and <sup>13</sup>C-NMR spectra for compound **6b**

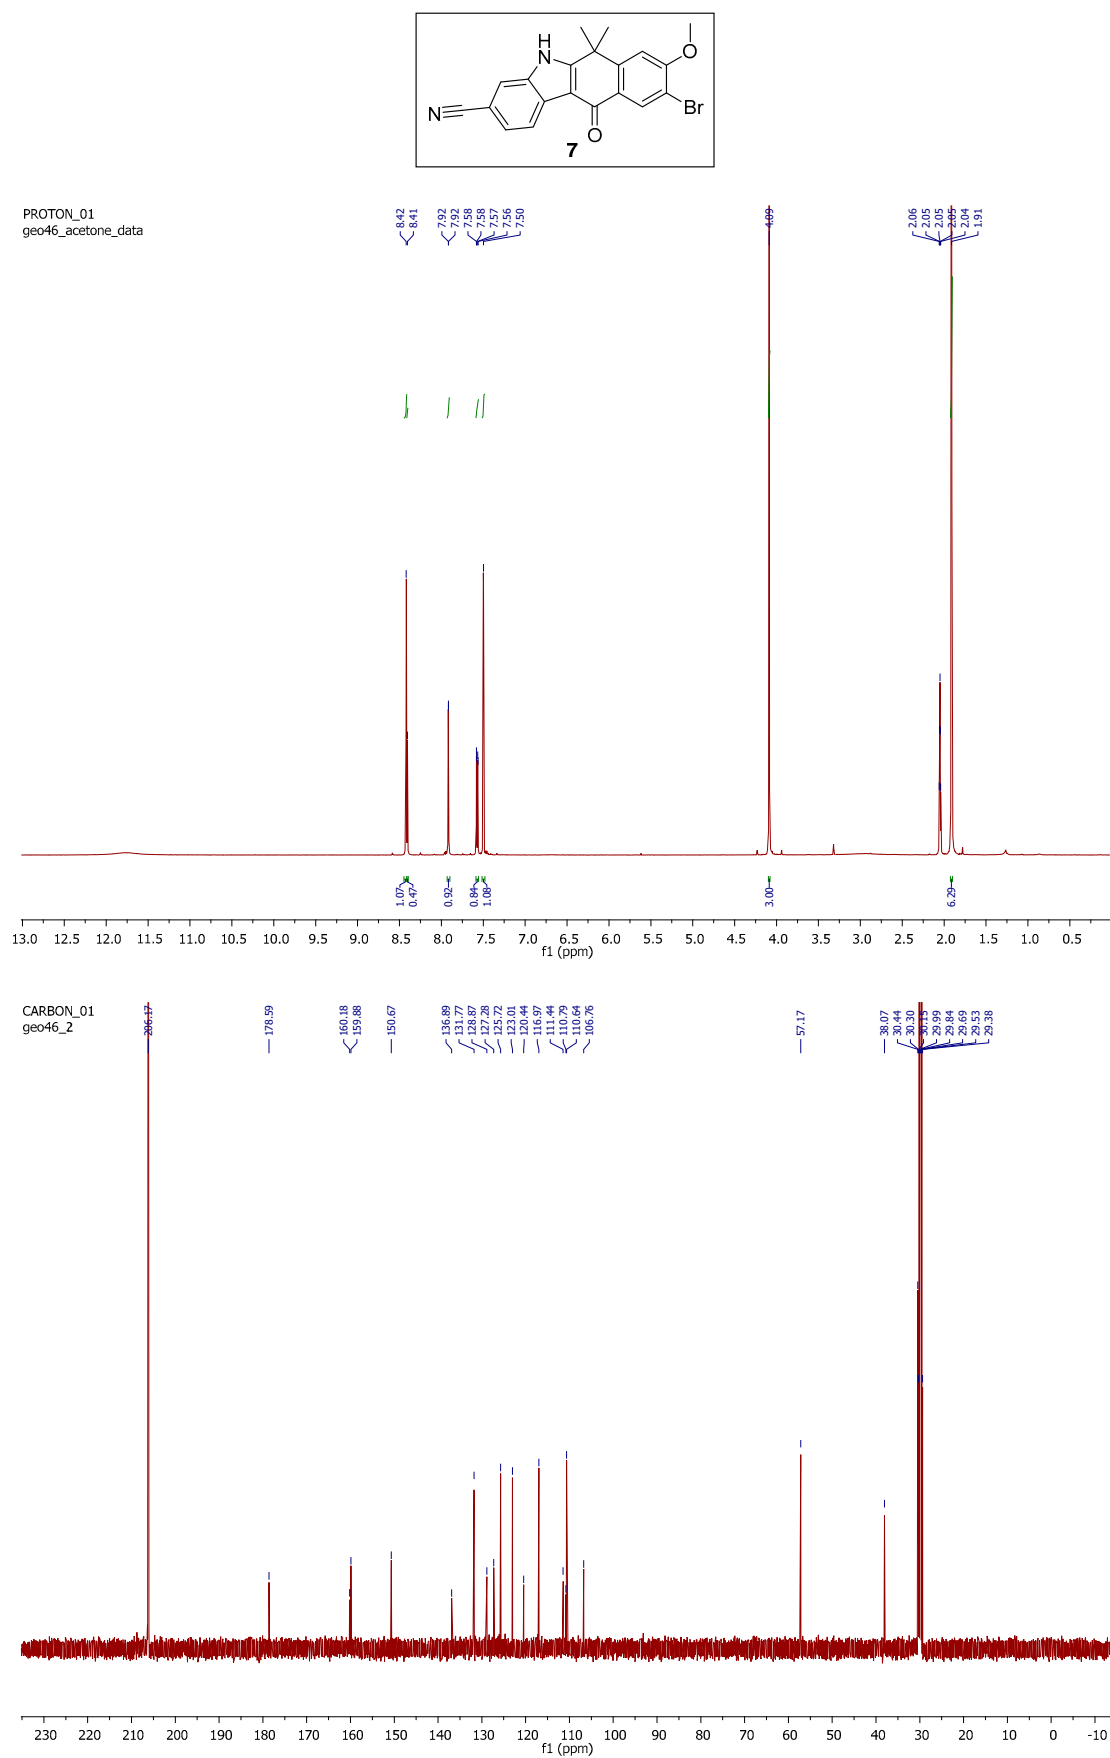

**Figure S10.**  $^1\text{H}$ -NMR and  $^{13}\text{C}$ -NMR spectra for compound **7**

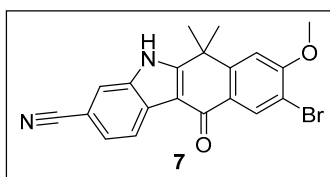

Method 1

Retention time: 29.1 m

area: 80446192 (absorbance units x minutes)

total area: 80745691 (absorbance units x minutes)

area %:  $(80446192/80745691) \times 100 = 99.6\%$

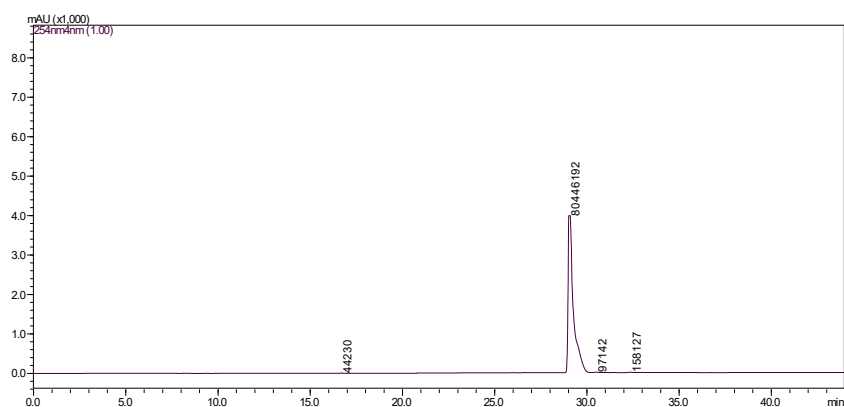

**Figure S11.** ESI-LCMS of compound **7** after column chromatography purification

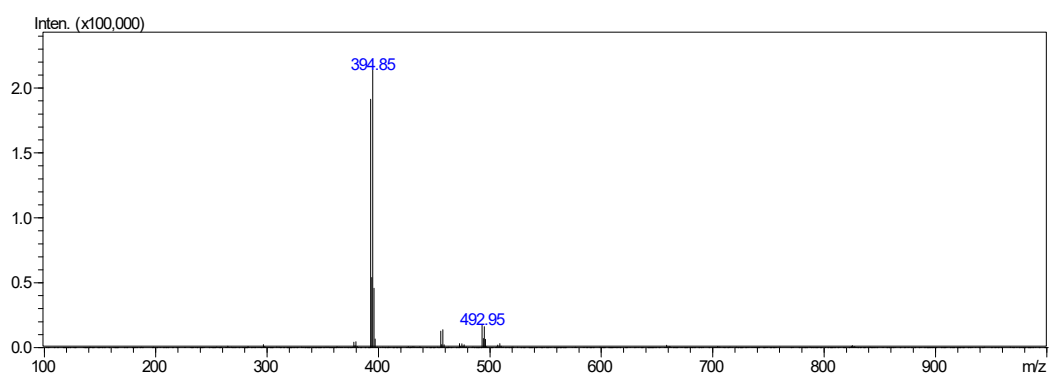

**Figure S12.** ESI-MS for **7**, negative mode:  $m/z$  calcd mass for  $C_{20}H_{14}BrN_2O_2$   $[M-H]^- = 393.02$ , was found 394.85

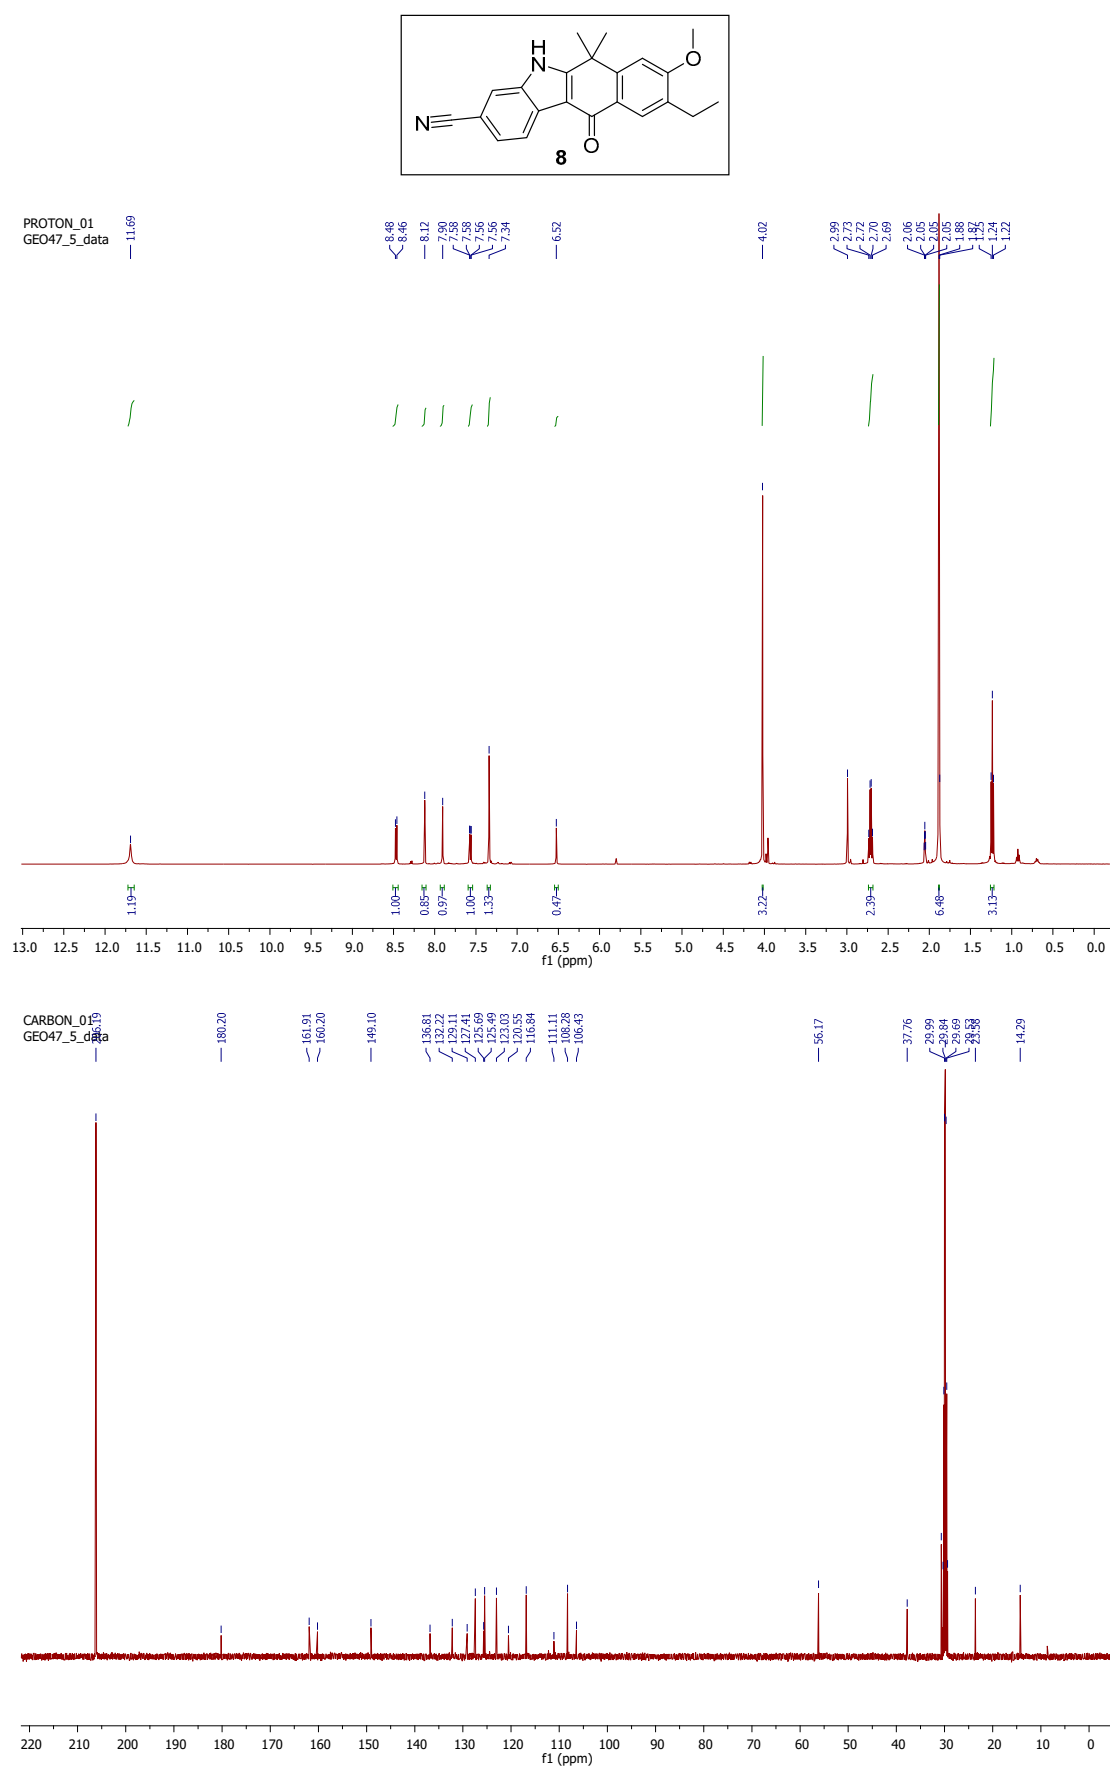

**Figure S13.** <sup>1</sup>H-NMR and <sup>13</sup>C-NMR spectra for compound **8**

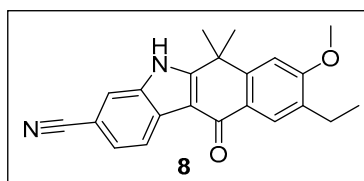

Method 3

Retention time: 29.4 m

area: 31599537 (absorbance units x minutes)

total area: 34213713 (absorbance units x minutes)

area %:  $(31599537/34213713) \times 100 = 92.3 \%$

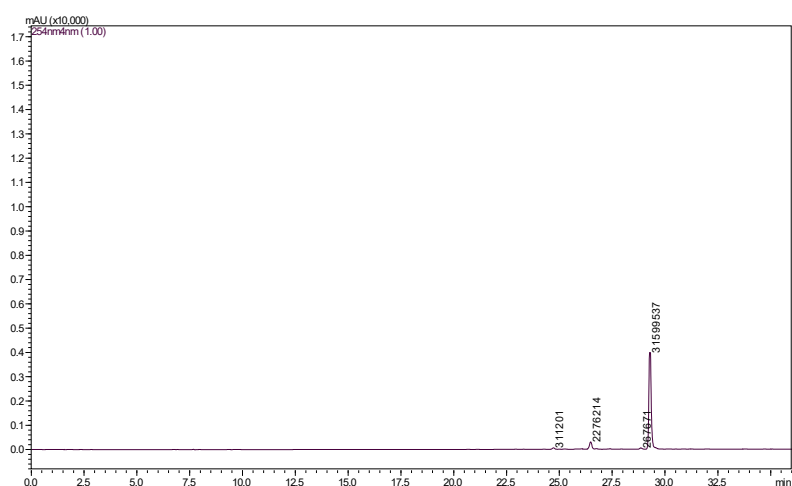

**Figure S14.** ESI-LCMS of compound **8** after column chromatography purification

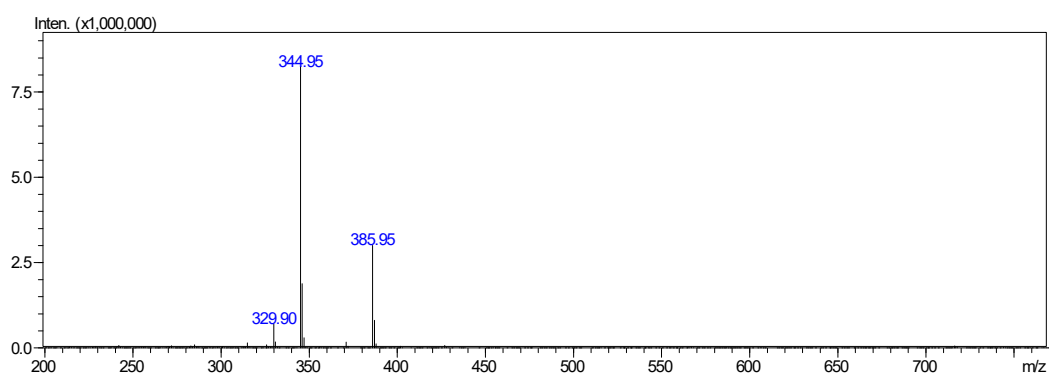

**Figure S15.** ESI-MS for **8**, positive mode:  $m/z$  calcd mass for  $C_{22}H_{20}N_2O_2$   $[M]^+ = 344.15$ , was found 344.95

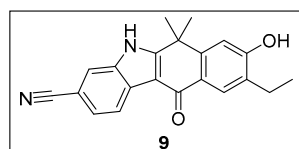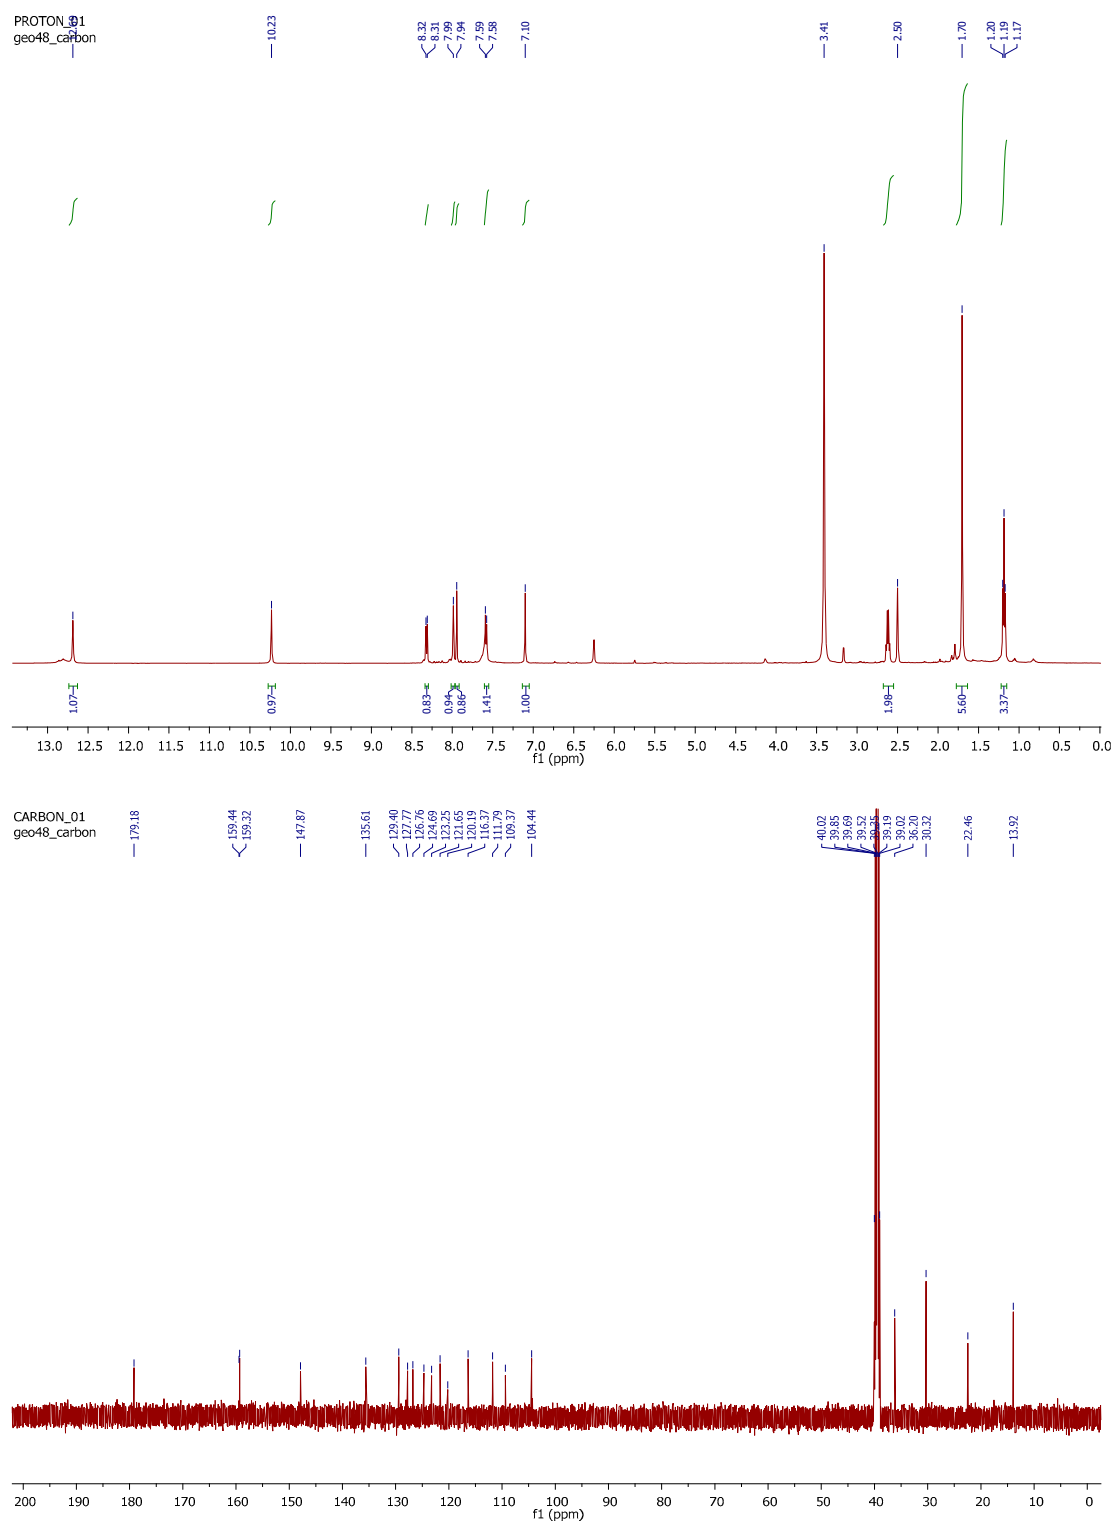

Figure S16. <sup>1</sup>H-NMR and <sup>13</sup>C-NMR spectra for compound **9**



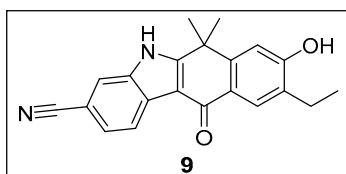

MeOH isocratic elution

Retention time: 10.5 m

area: 93581467 (absorbance units x minutes)

total area: 93806687 (absorbance units x minutes)

area %:  $(93581467/93806687) \times 100 = 99.7 \%$

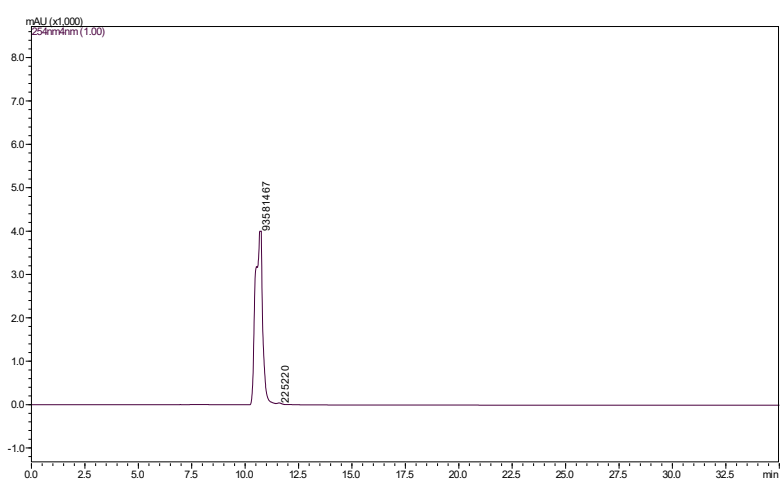

**Figure S17.** ESI-LCMS of compound **9** after column chromatography purification

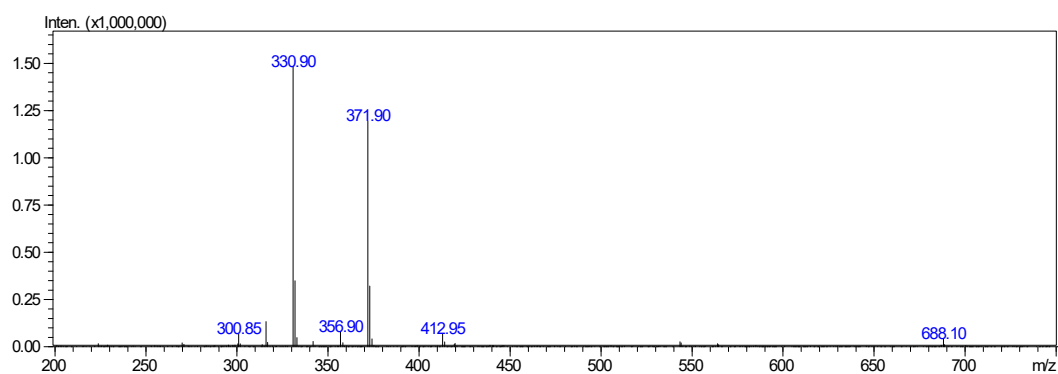

**Figure S18.** ESI-MS for **9**, positive mode:  $m/z$  calcd mass for  $C_{21}H_{18}N_2O_2$   $[M+H]^+ = 330.14$ , was found 330.90

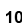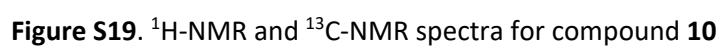

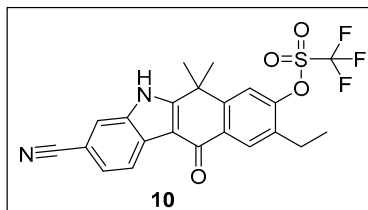

#### Method 1

Retention time: 32.1 m

area: 28426895 (absorbance units x minutes)

total area: 29099709 (absorbance units x minutes)

area %:  $(28426895/29099709) \times 100 = 97.7 \%$

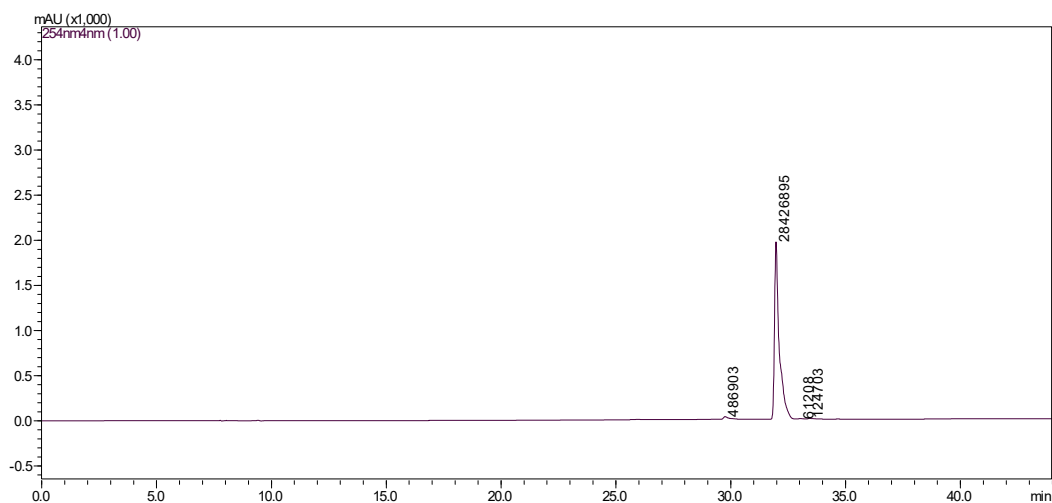

**Figure S20.** ESI-LCMS of compound **10** after column chromatography purification

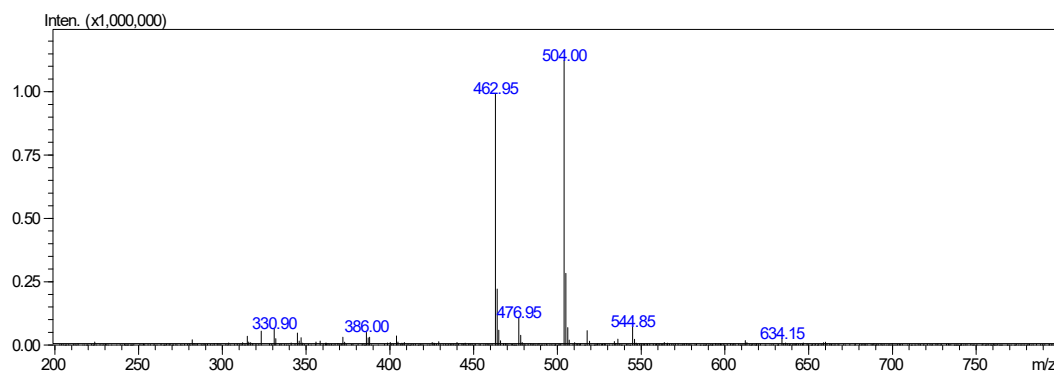

**Figure S21.** ESI-MS for **10**, positive mode:  $m/z$  calcd mass for  $C_{22}H_{17}F_3N_2O_4S$   $[M]^+ = 462.08$ , was found 462.95

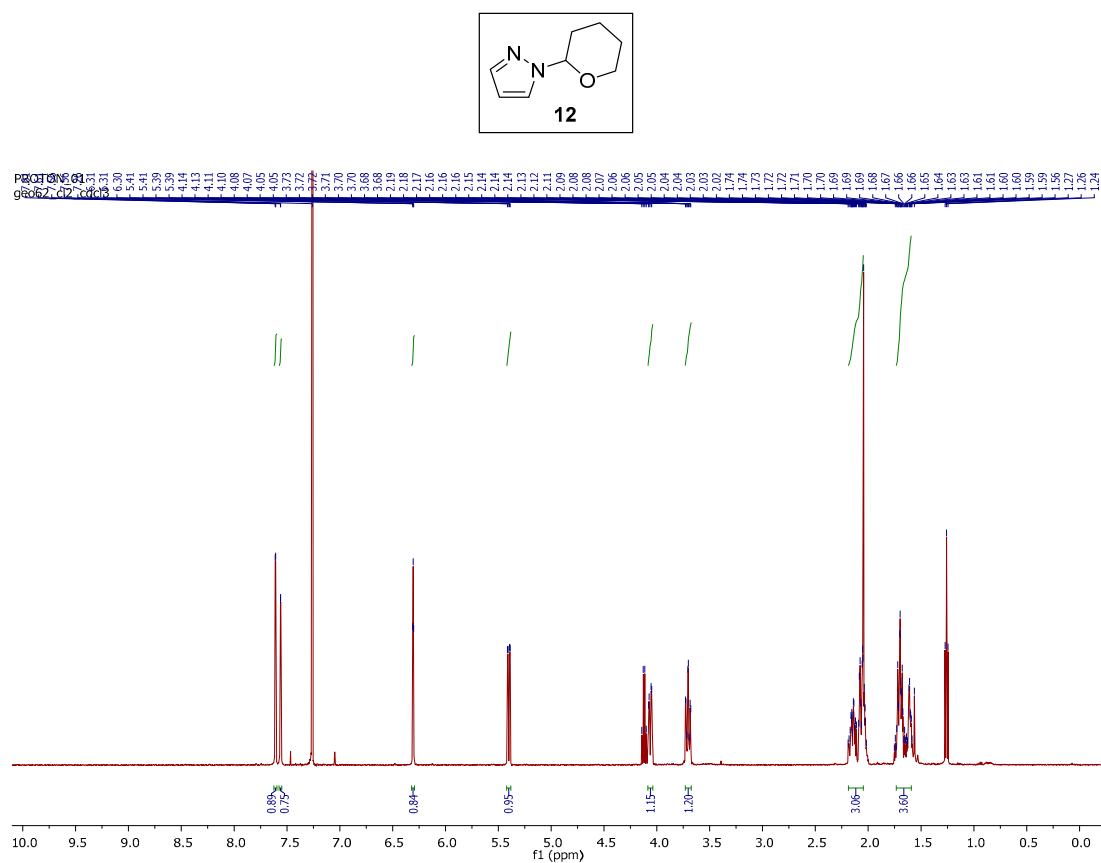

**Figure S22.**  $^1\text{H}$ -NMR for compound **12**

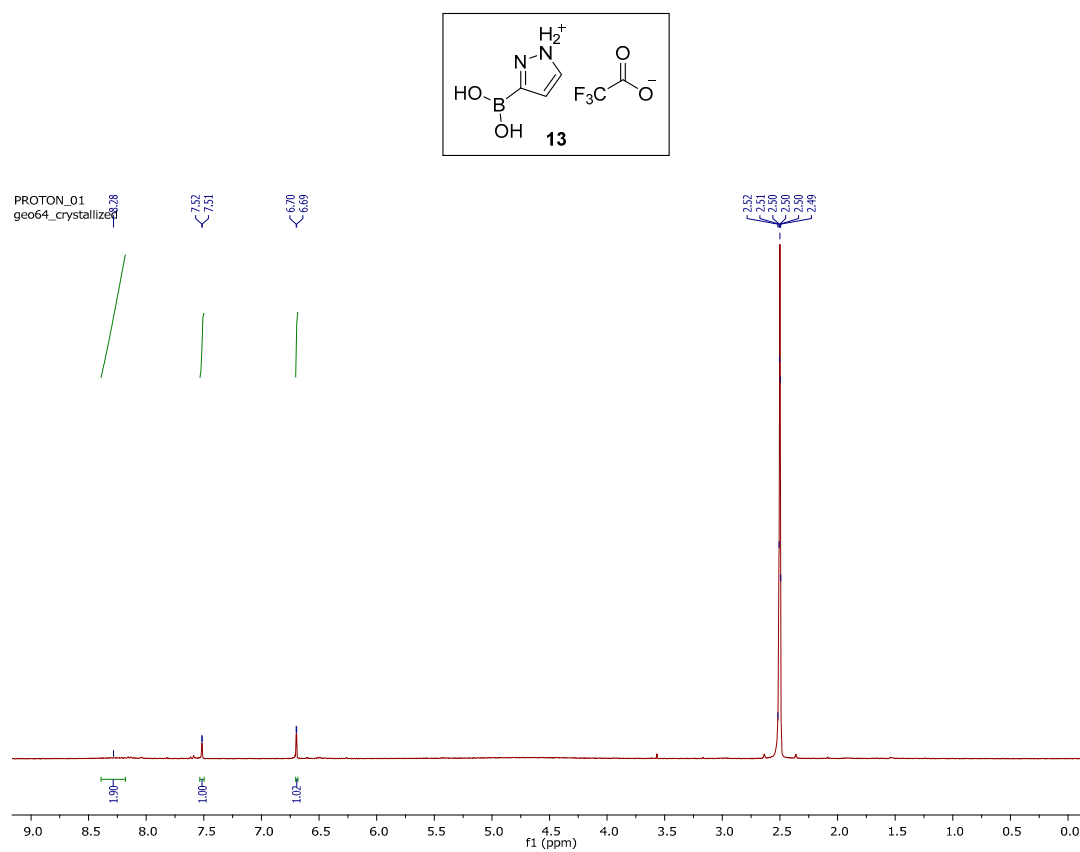

**Figure S23.**  $^1\text{H}$ -NMR for compound **13**

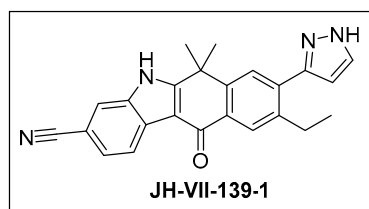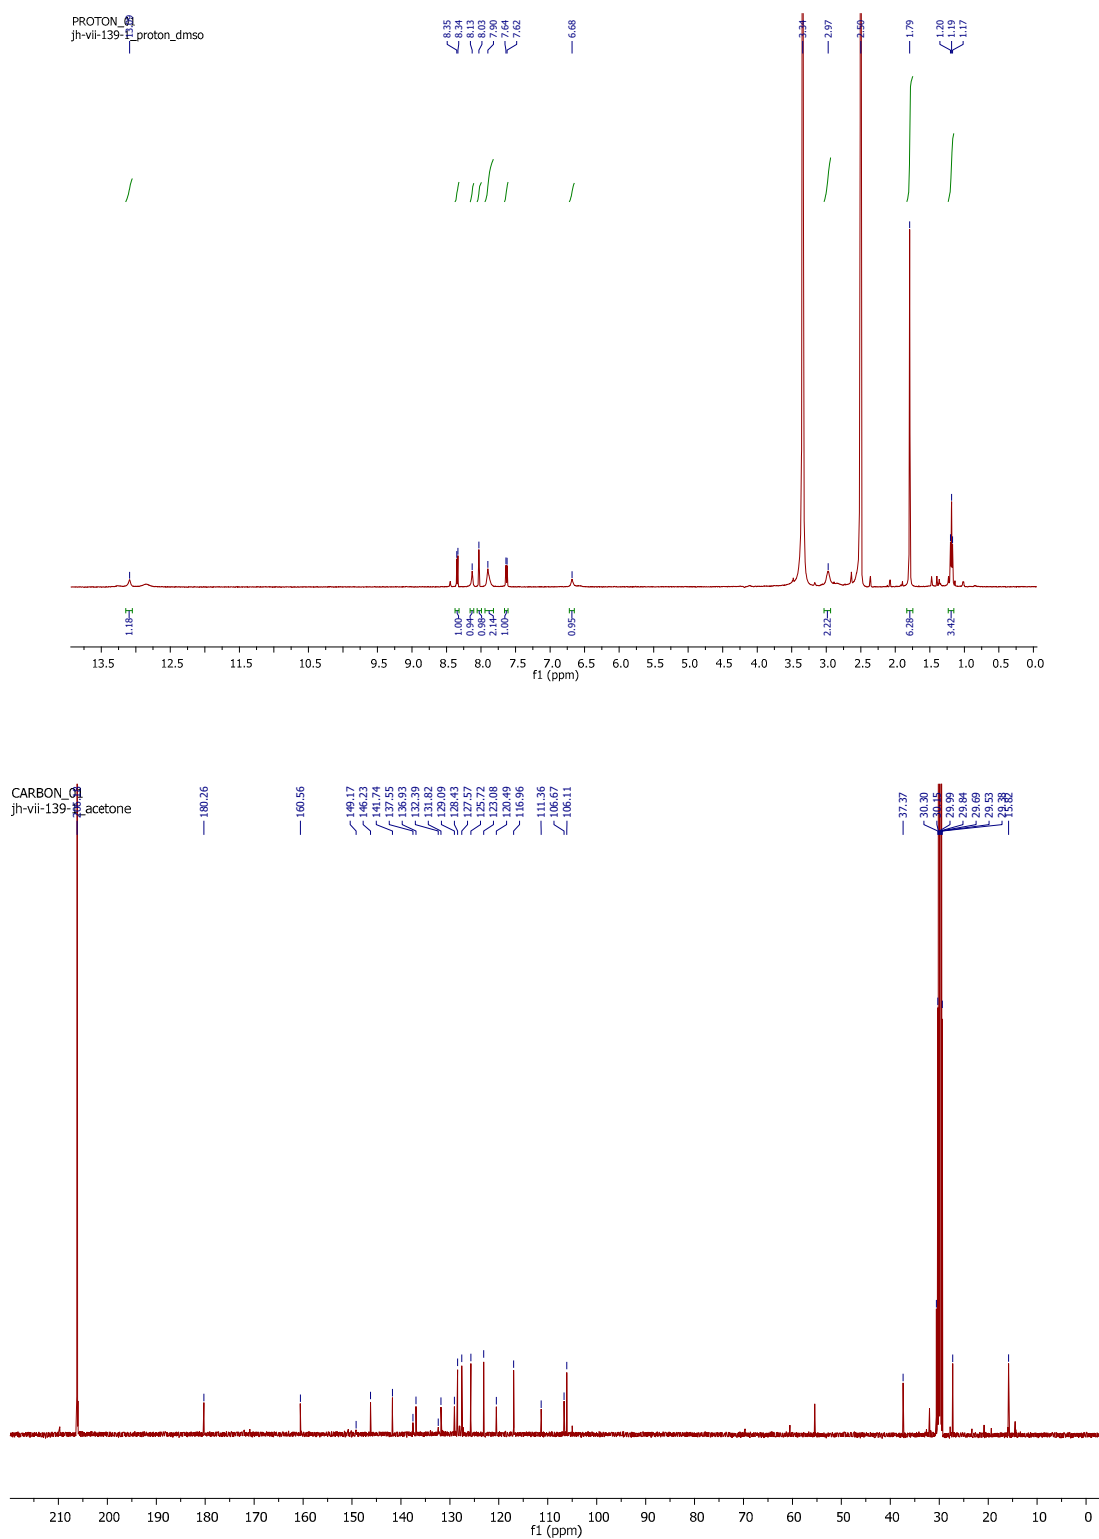

**Figure S24.**  $^1\text{H}$ -NMR and  $^{13}\text{C}$ -NMR spectra for compound **JH-VII-139-1**

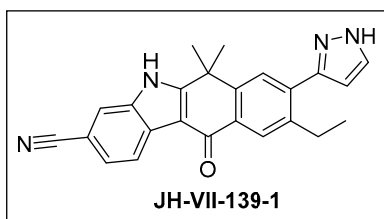

Method 1

Retention time: 26.3 m

area: 8070456 (absorbance units x minutes)

total area: 8258696 (absorbance units x minutes)

area %:  $(8070456/8258696) \times 100 = 97.7 \%$

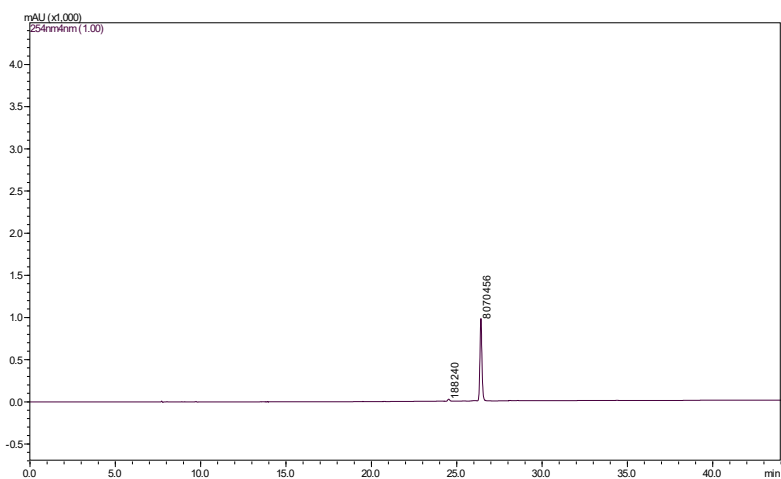

**Figure S25.** ESI-LCMS of compound **JH-VII-139-1** after column chromatography purification

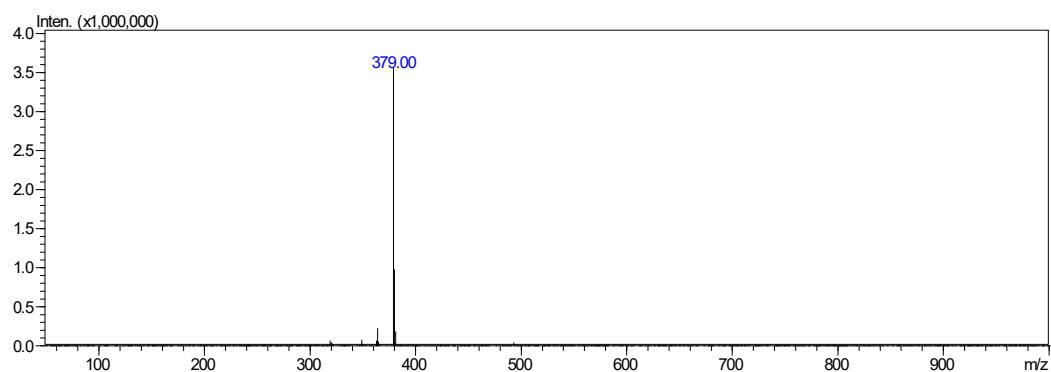

**Figure S26.** ESI-MS for **JH-VII-139-1**, negative mode: m/z calcd mass for  $C_{24}H_{20}N_4O$   $[M-H]^-$  = 379.16, was found 379.00

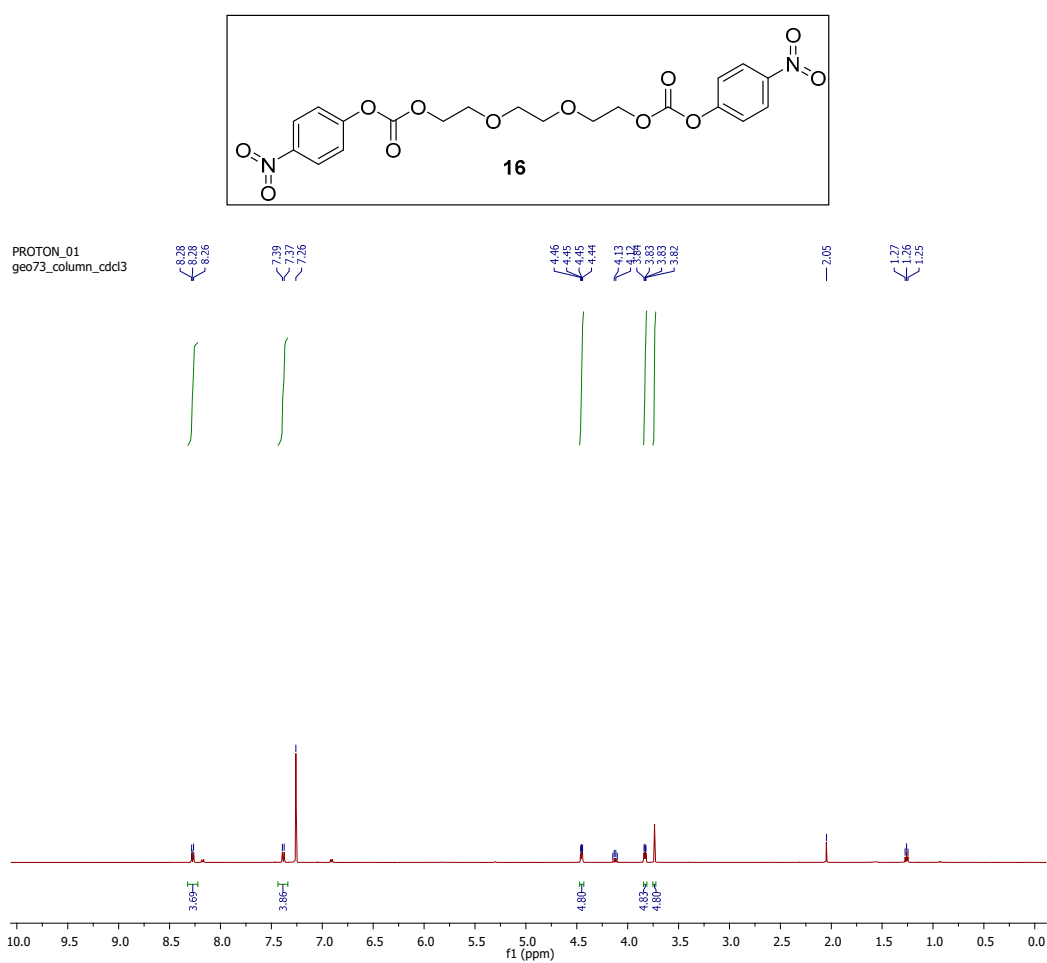

**Figure S27.**  $^1\text{H-NMR}$  spectrum for compound **16**

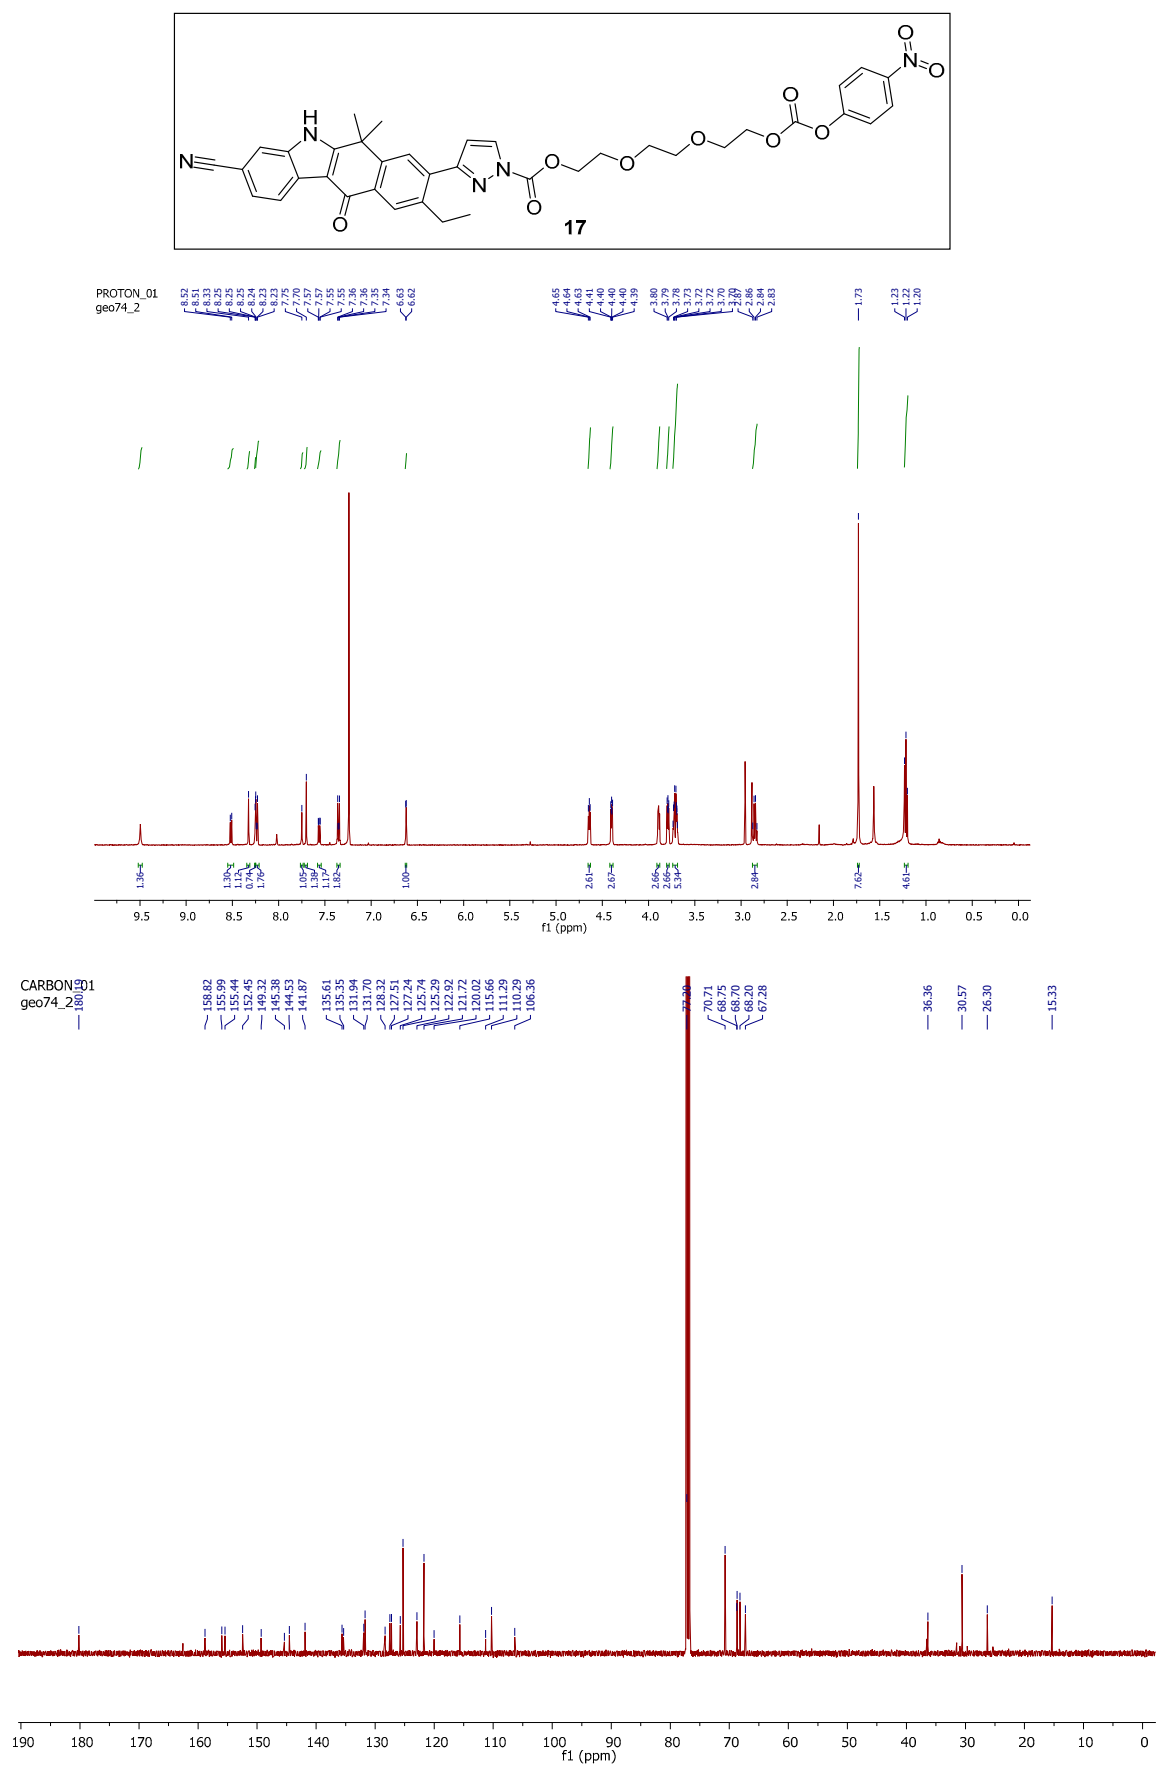

**Figure S28.** <sup>1</sup>H-NMR and <sup>13</sup>C-NMR spectra for compound **17**



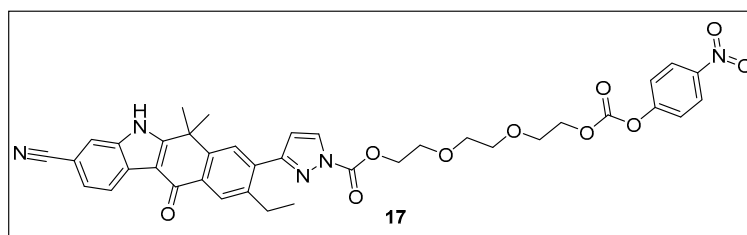

#### Method 1

Retention time: 29.5 m

area: 25509809 (absorbance units x minutes)

total area: 26264849 (absorbance units x minutes)

area %:  $(25509809/26264849) \times 100 = 97.1 \%$

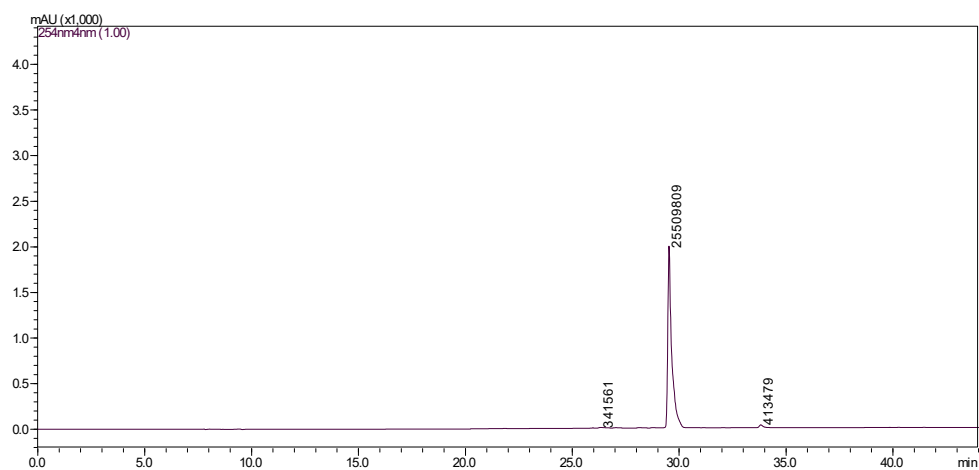

**Figure S29.** ESI-LCMS of compound **17** after column chromatography purification

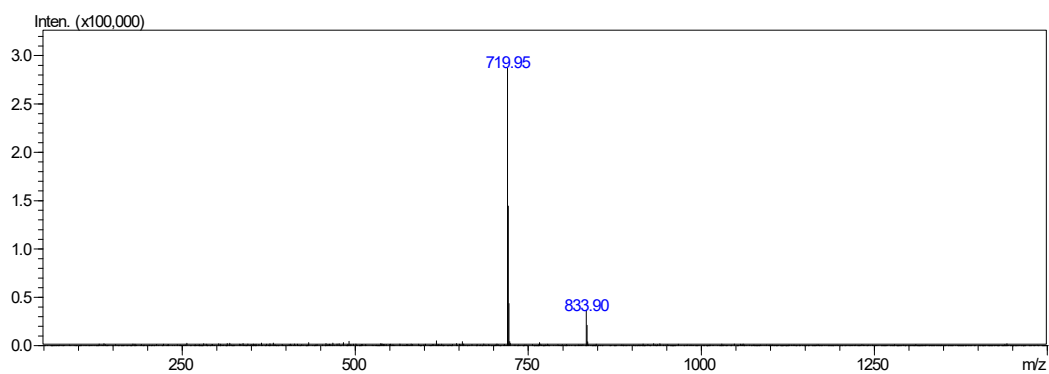

**Figure S30.** ESI-MS for **17**, negative mode:  $m/z$  calcd mass for  $C_{38}H_{35}N_5O_{10}$   $[M+H]^+ = 720.24$ , was found 719.95

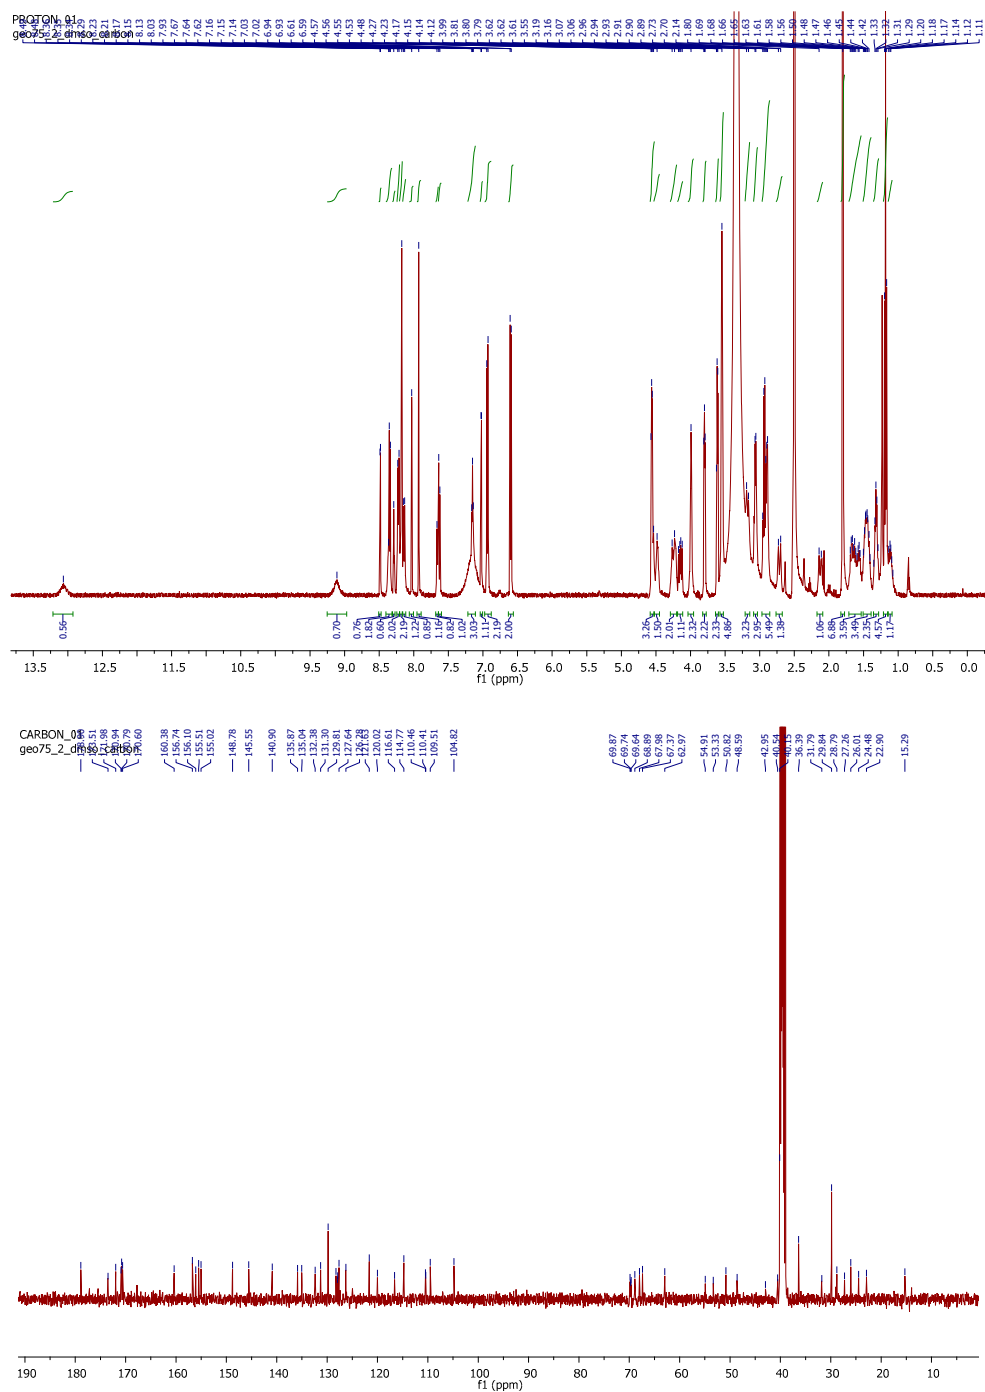

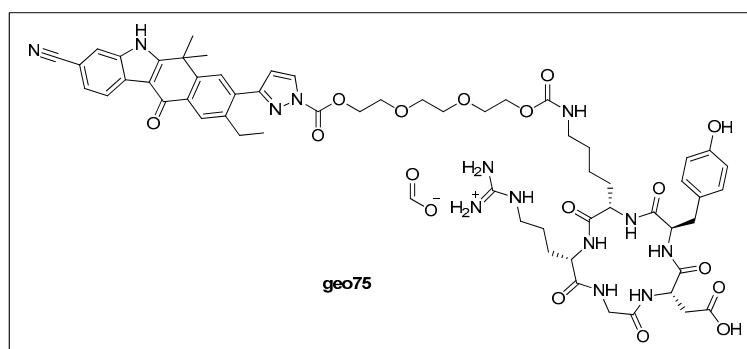

#### Method 1

Retention time: 20.9 m

area: 32830161 (absorbance units x minutes)

total area: 33143414 (absorbance units x minutes)

area %:  $(32830161/33143414) \times 100 = 99.0 \%$

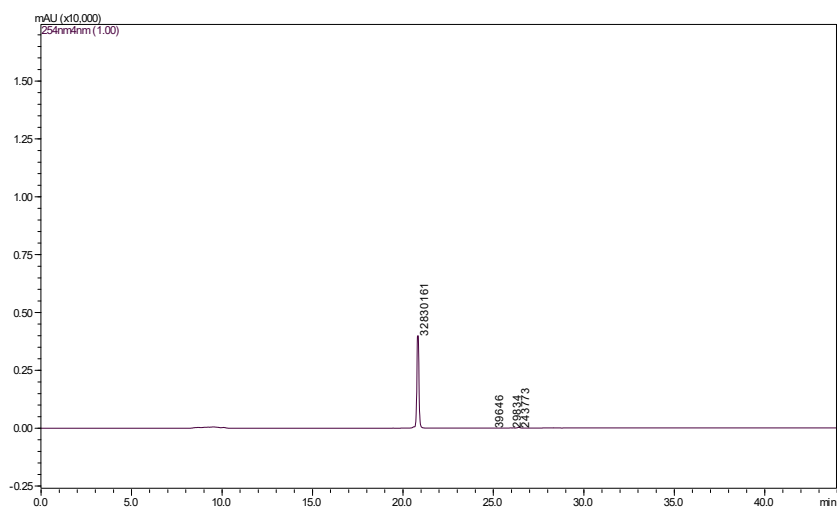

**Figure S32.** ESI-LCMS of compound **geo75** after column chromatography purification

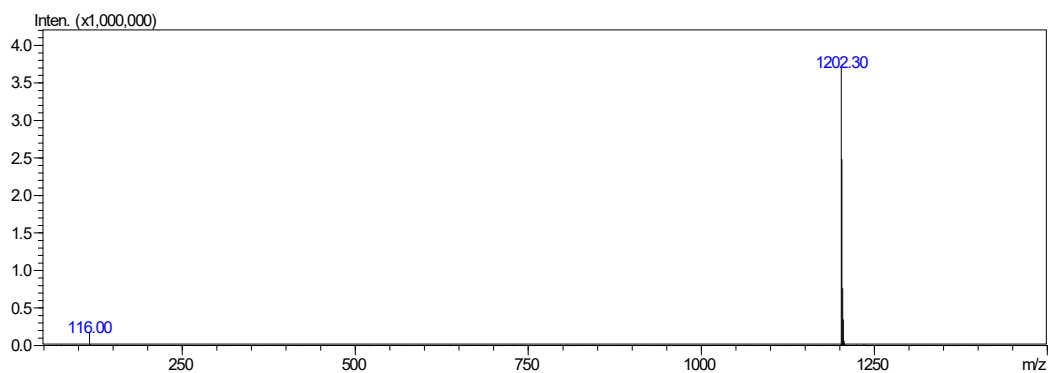

**Figure S33.** ESI-MS for **geo75**, positive mode:  $m/z$  calcd mass for  $C_{59}H_{71}N_{13}O_{15}$   $[M+H]^+ = 1202.52$ , was found 1202.30.

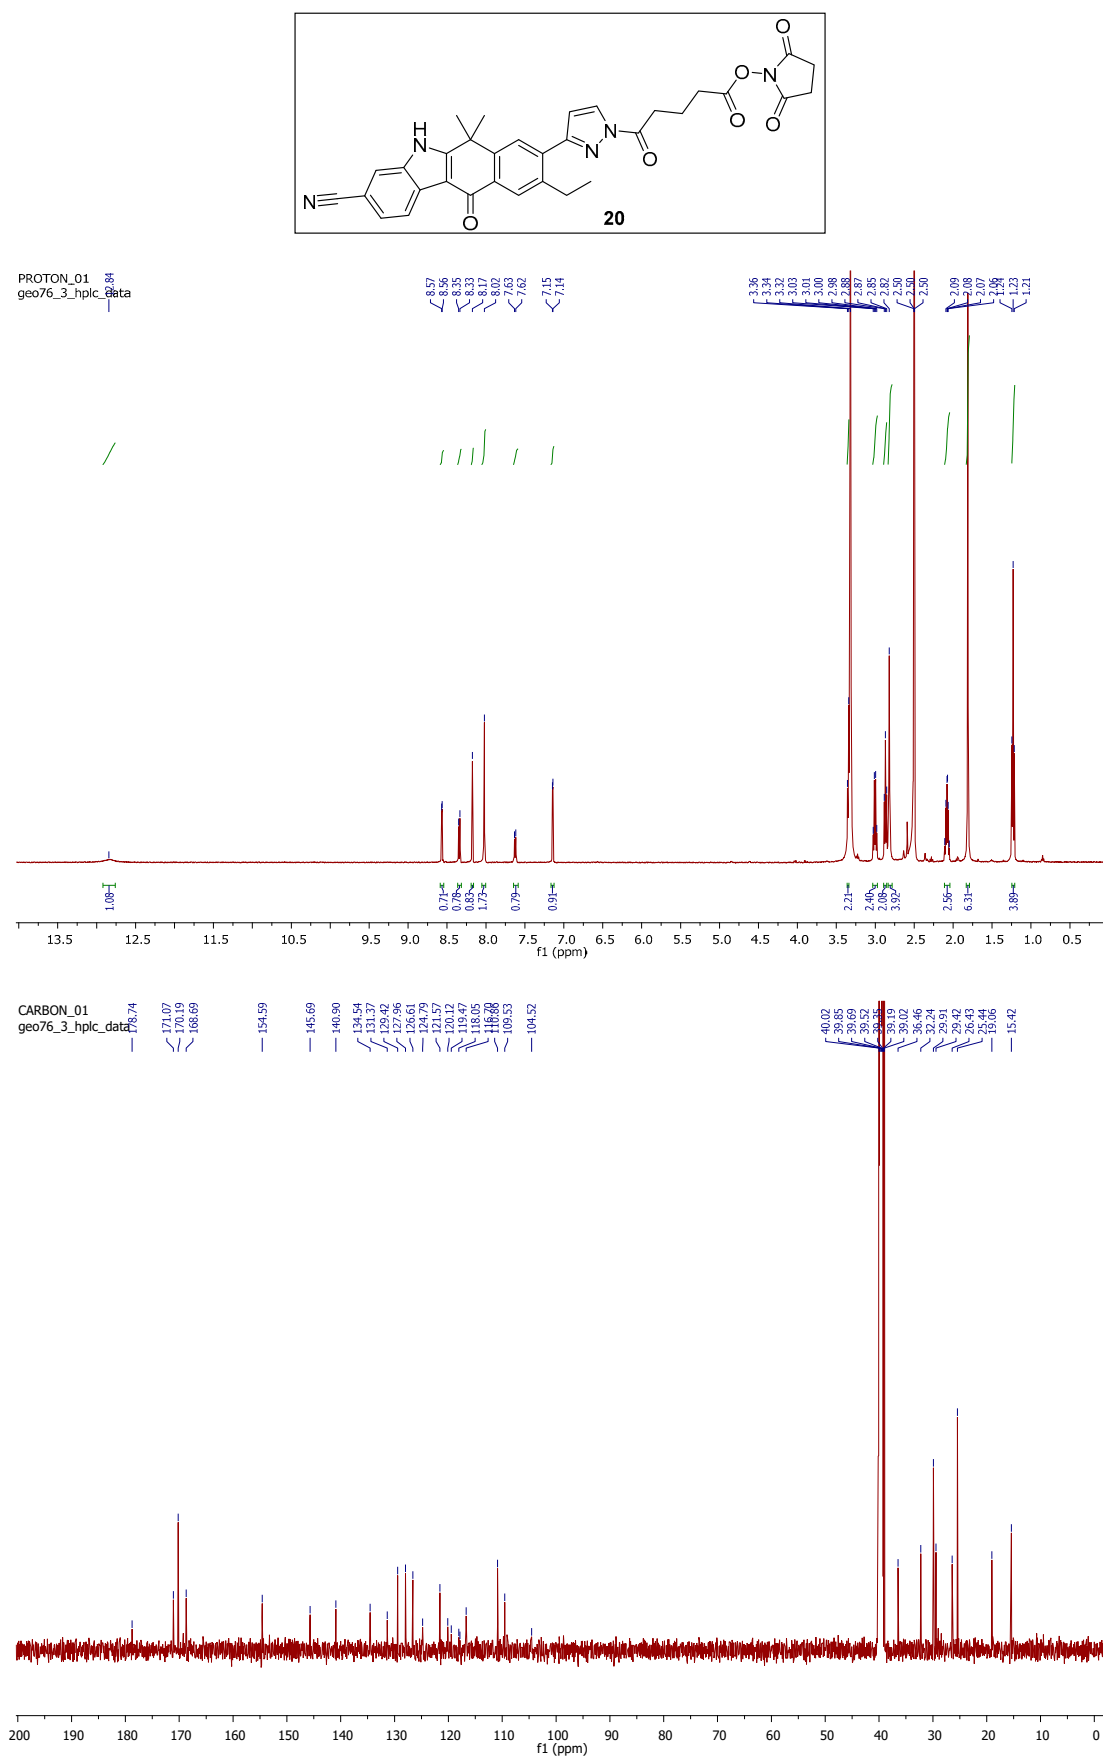

**Figure S34.** <sup>1</sup>H-NMR and <sup>13</sup>C-NMR spectra for compound **20**

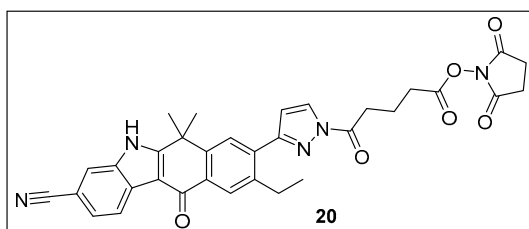

Method 1

Retention time: 28.9 m

area: 7423047 (absorbance units x minutes)

total area: 8244264 (absorbance units x minutes)

area %:  $(7423047/8244264) \times 100 = 90.1 \%$

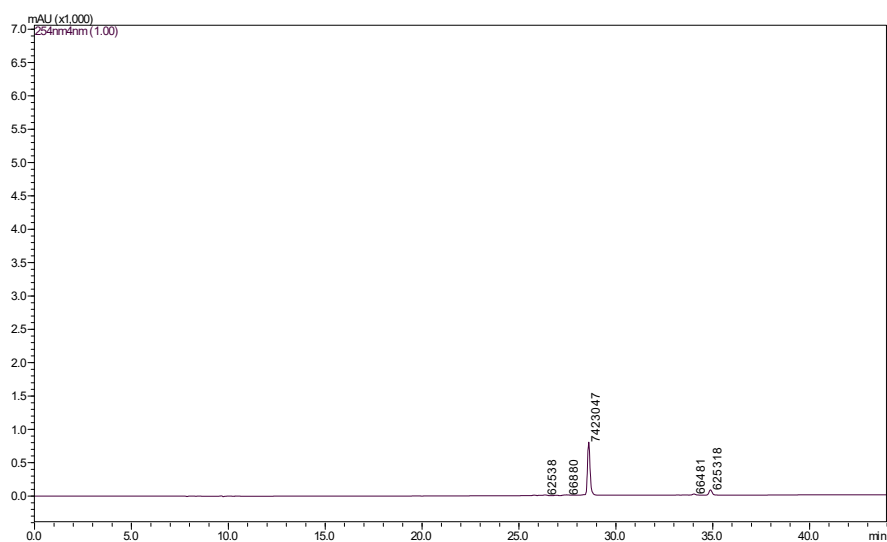

**Figure S35.** ESI-LCMS of compound **20** after column chromatography purification

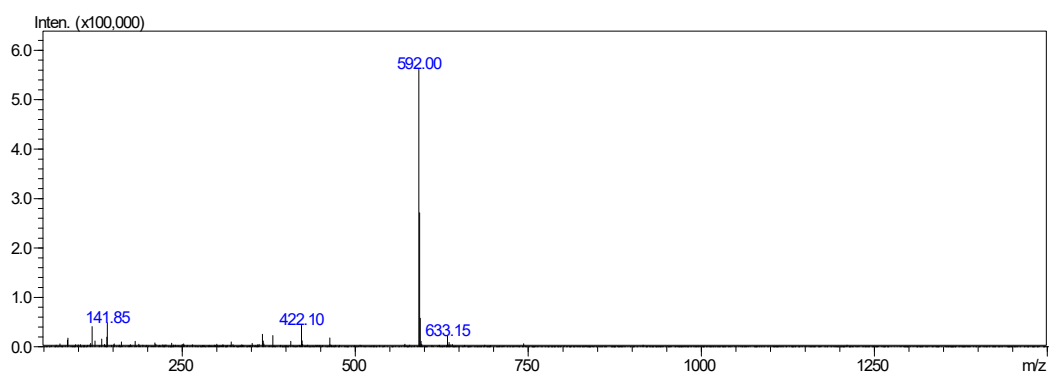

**Figure S36.** ESI-MS for **20**, positive mode:  $m/z$  calcd mass for  $C_{33}H_{29}N_5O_6$   $[M+H]^+ = 592.21$ , was found 592.00

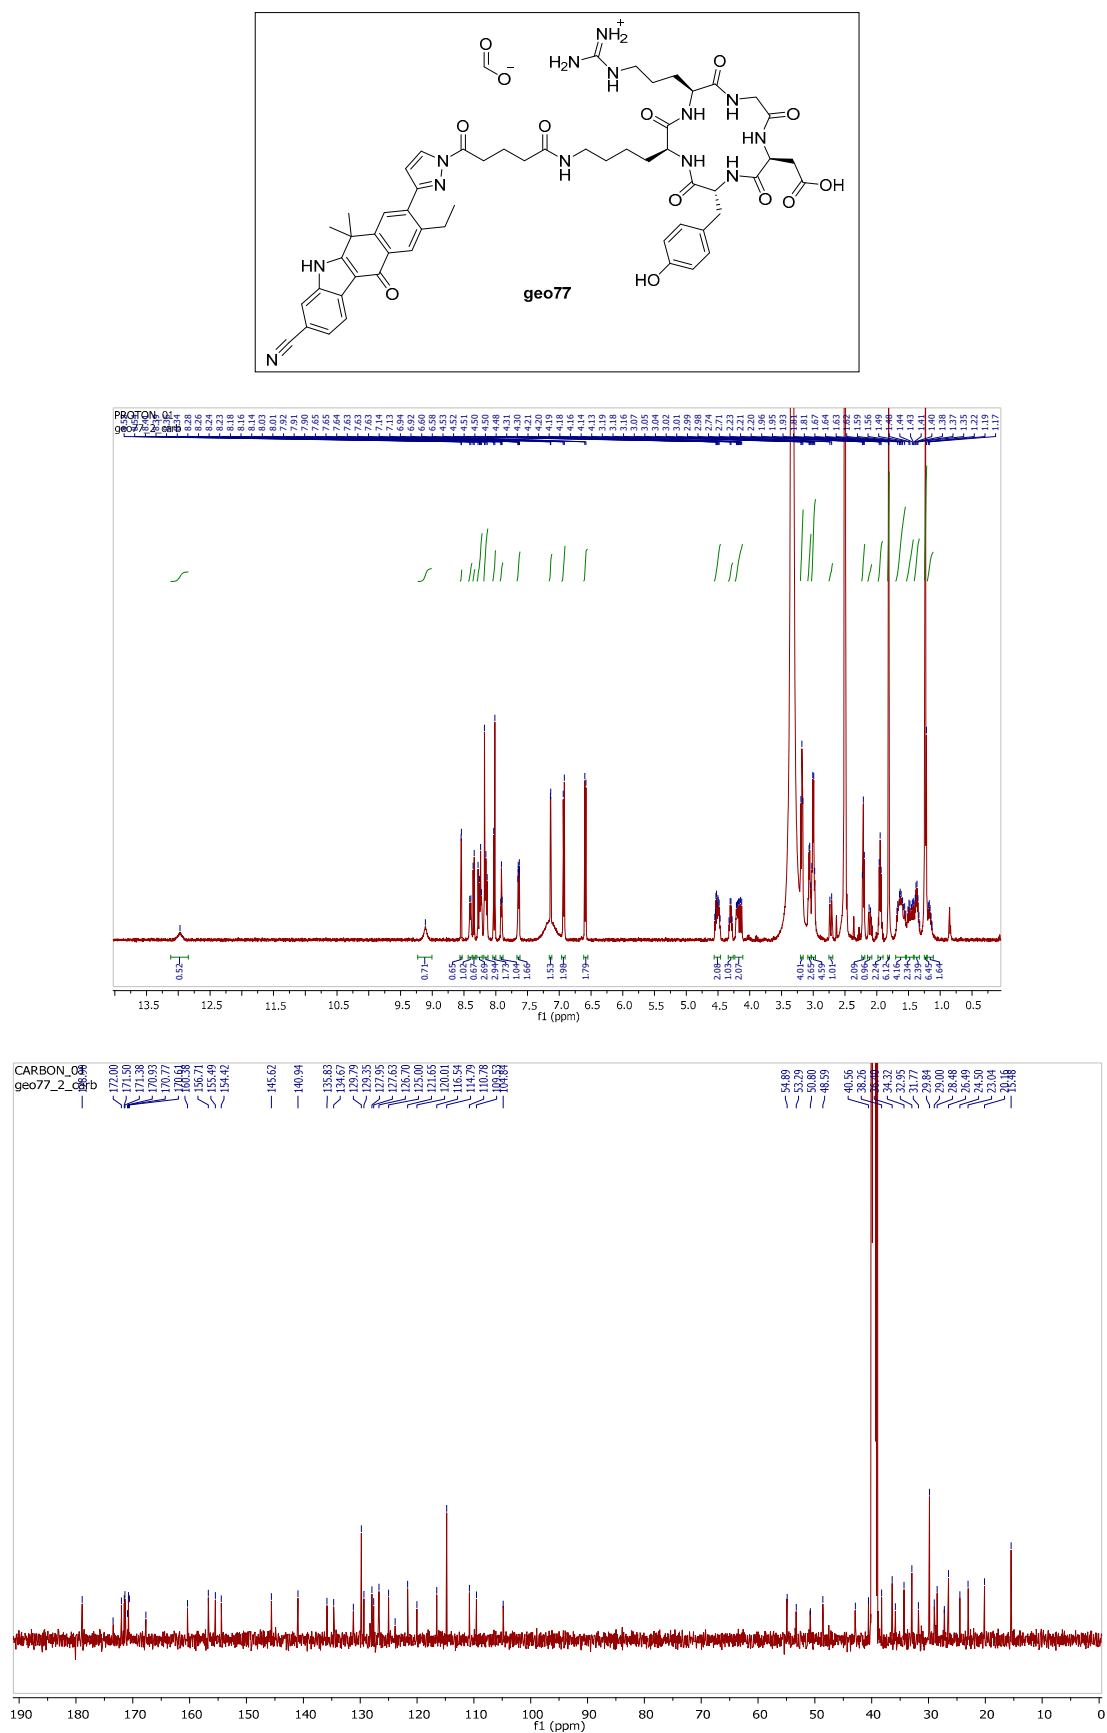

**Figure S37.** <sup>1</sup>H-NMR and <sup>13</sup>C-NMR spectra for compound **geo77**.

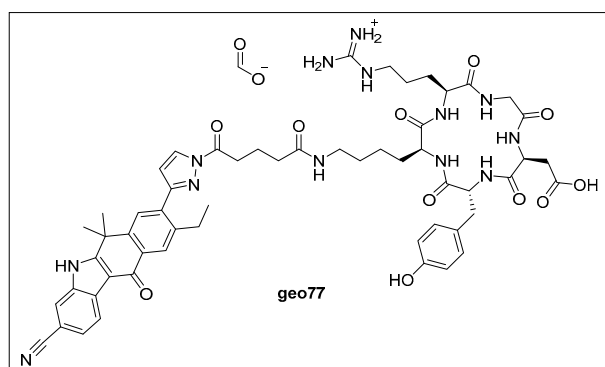

#### Method 1

Retention time: 20.9 m

area: 54752812 (absorbance units x minutes)

total area: 55219719 (absorbance units x minutes)

area %:  $(54752812/55219719) \times 100 = 99.1 \%$

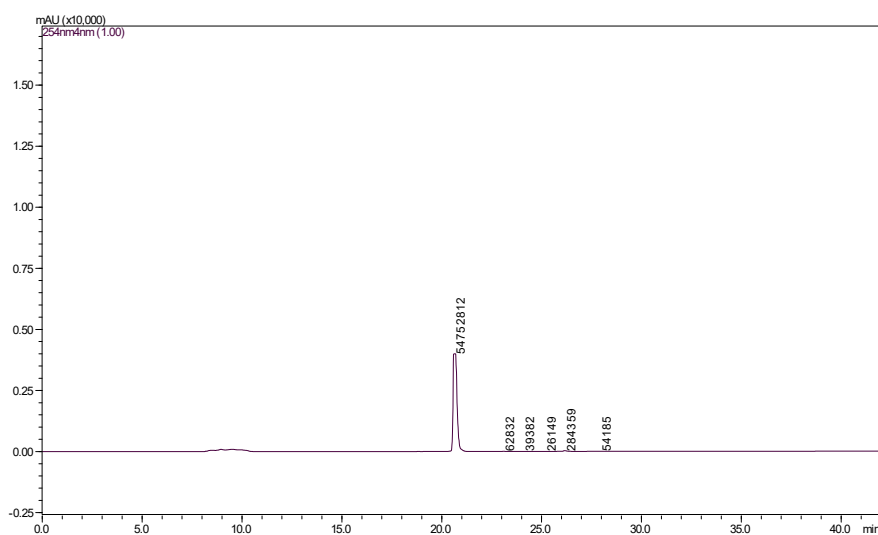

**Figure S38.** ESI-LCMS of compound **geo77** after HPLC purification.

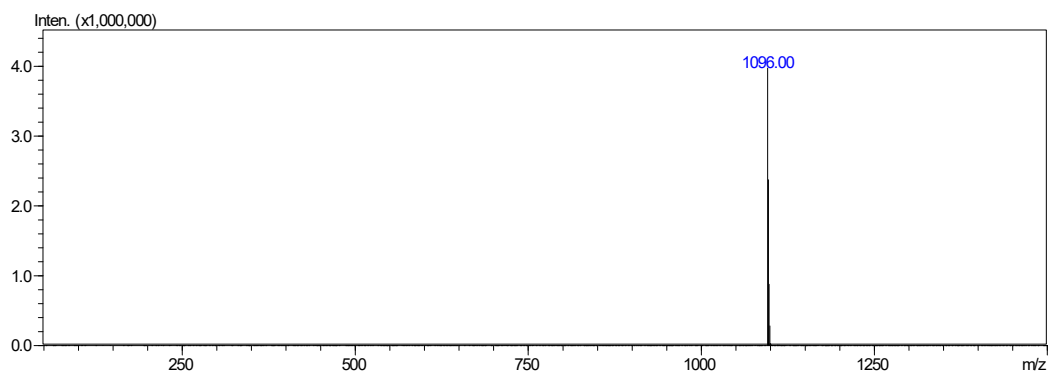

**Figure S39.** ESI-MS for **geo77**, positive mode:  $m/z$  calcd mass for  $C_{56}H_{66}N_{13}O_{11}$   $[M+H]^+ = 1096.49$ , was found 1096.00.

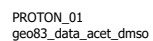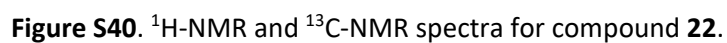



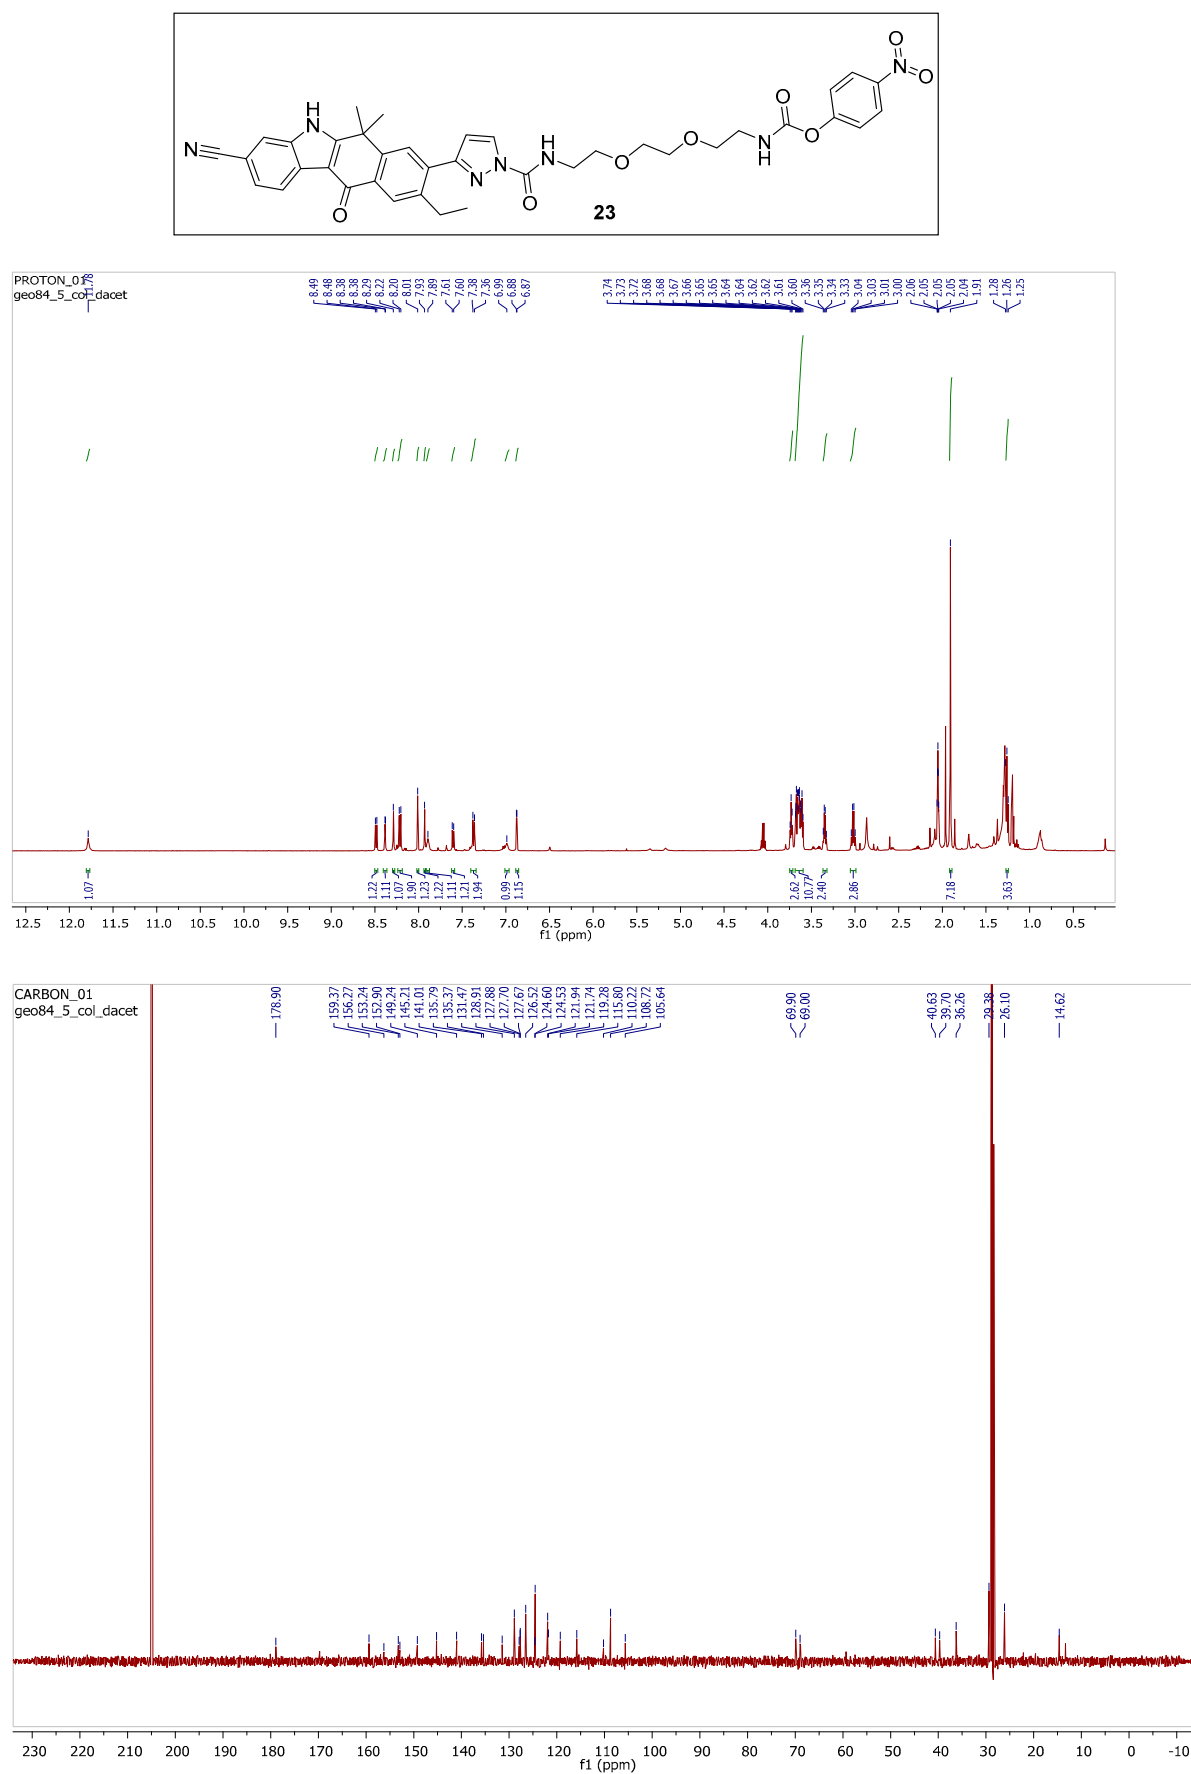

Figure S41. <sup>1</sup>H-NMR and <sup>13</sup>C-NMR spectra for compound **23**.

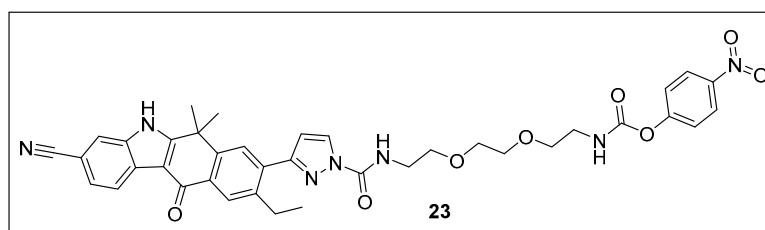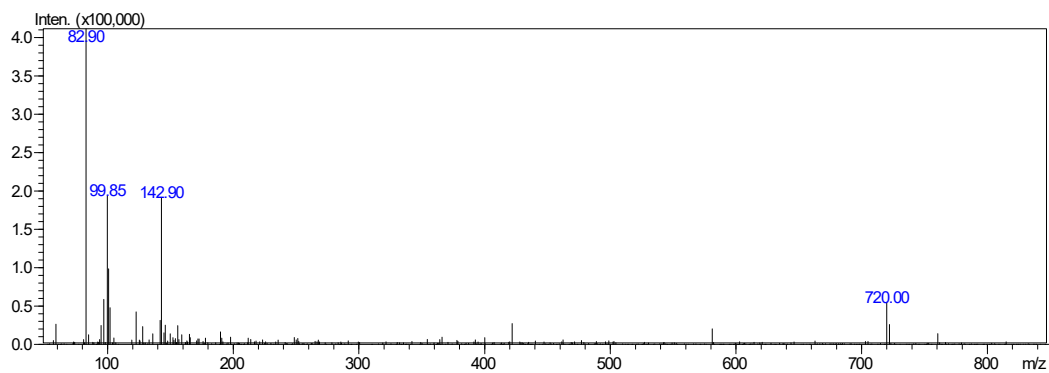

**Figure S42.** ESI-MS for **23**, positive mode: m/z calcd mass for  $C_{38}H_{38}N_7O_8$   $[M+H]^+ = 720.27$ , was found 720.00

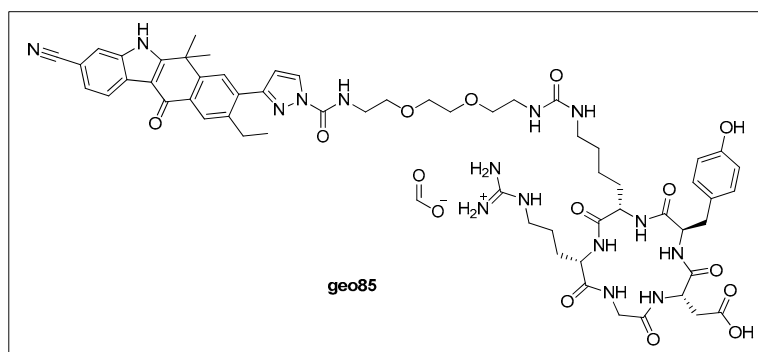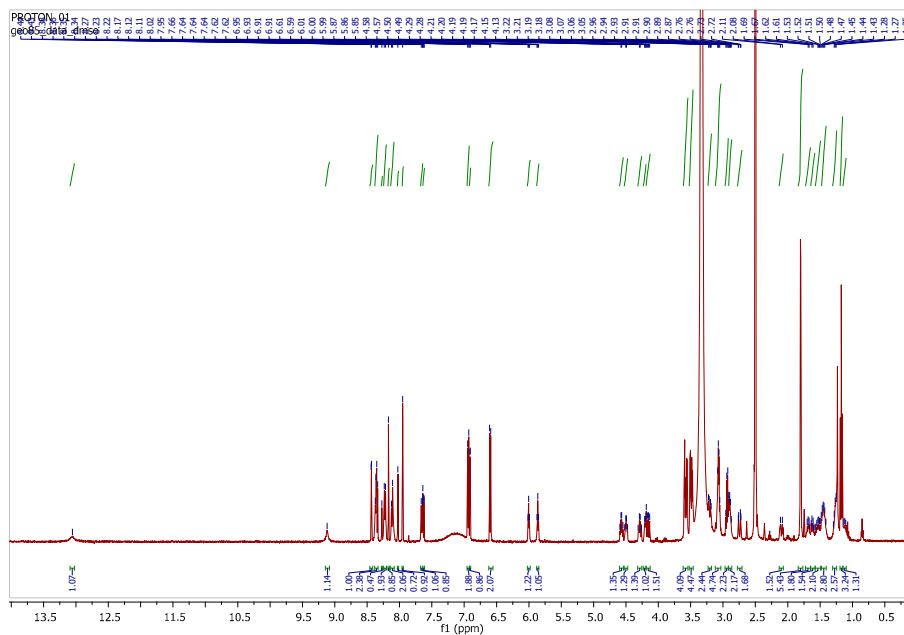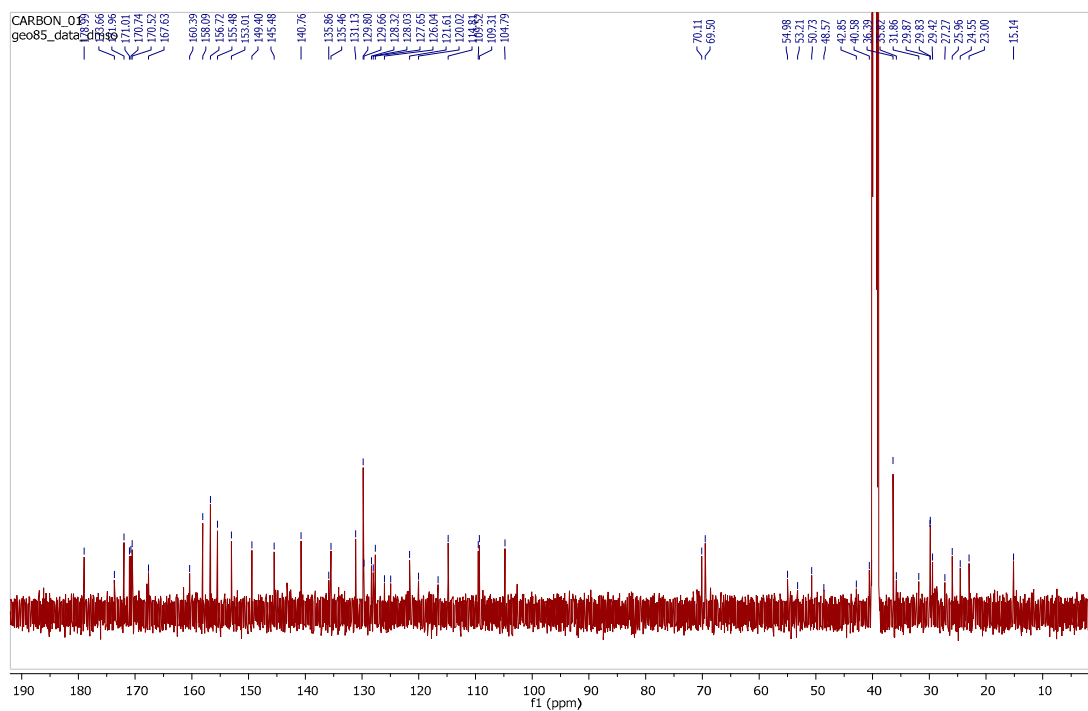

**Figure S42.**  $^1\text{H}$ -NMR and  $^{13}\text{C}$ -NMR spectra for compound **geo85**.

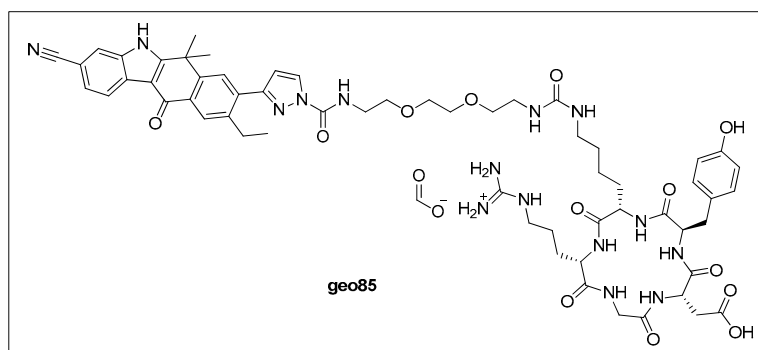

Method 1

Retention time: 20.9 m

area: 11577332 (absorbance units x minutes)

total area: 11811289 (absorbance units x minutes)

area %:  $(11577332/11811289) \times 100 = 98.0 \%$

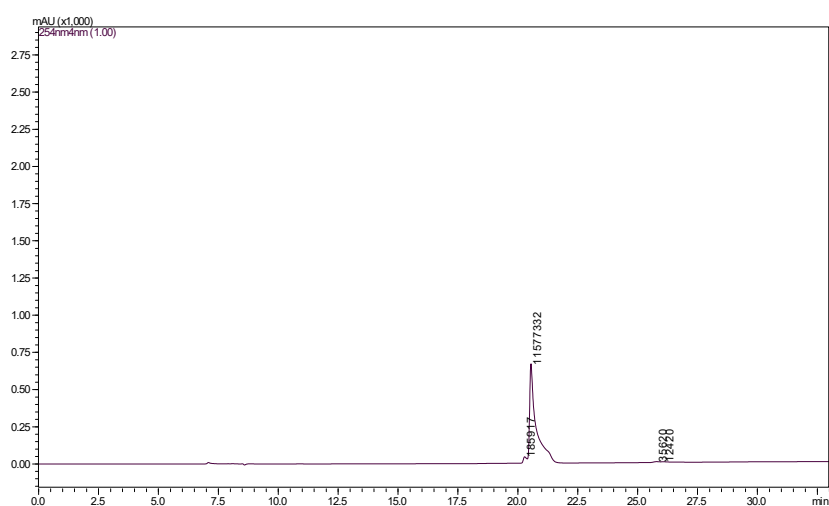

**Figure S43.** ESI-LCMS of compound **geo85** after HPLC purification

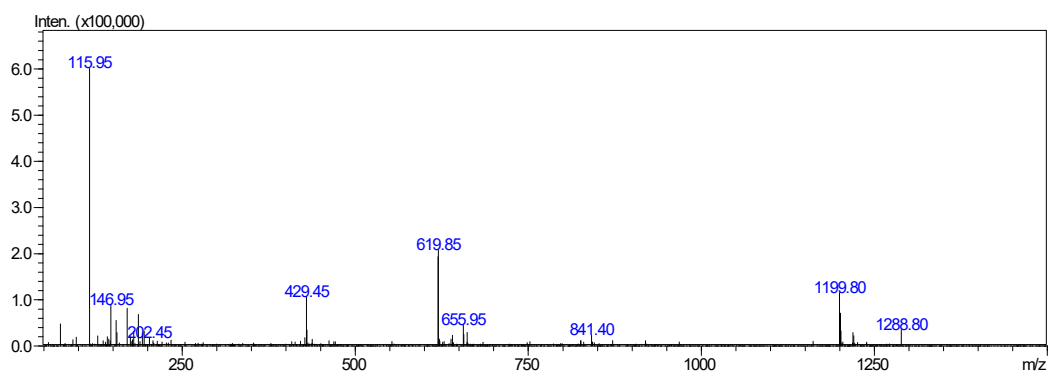

**Figure S44.** ESI-MS for **geo85**, positive mode:  $m/z$  calcd mass for  $C_{59}H_{74}N_{15}O_{13}$   
 $[M+H]^+ = 1200.55$ , was found 1199.80.

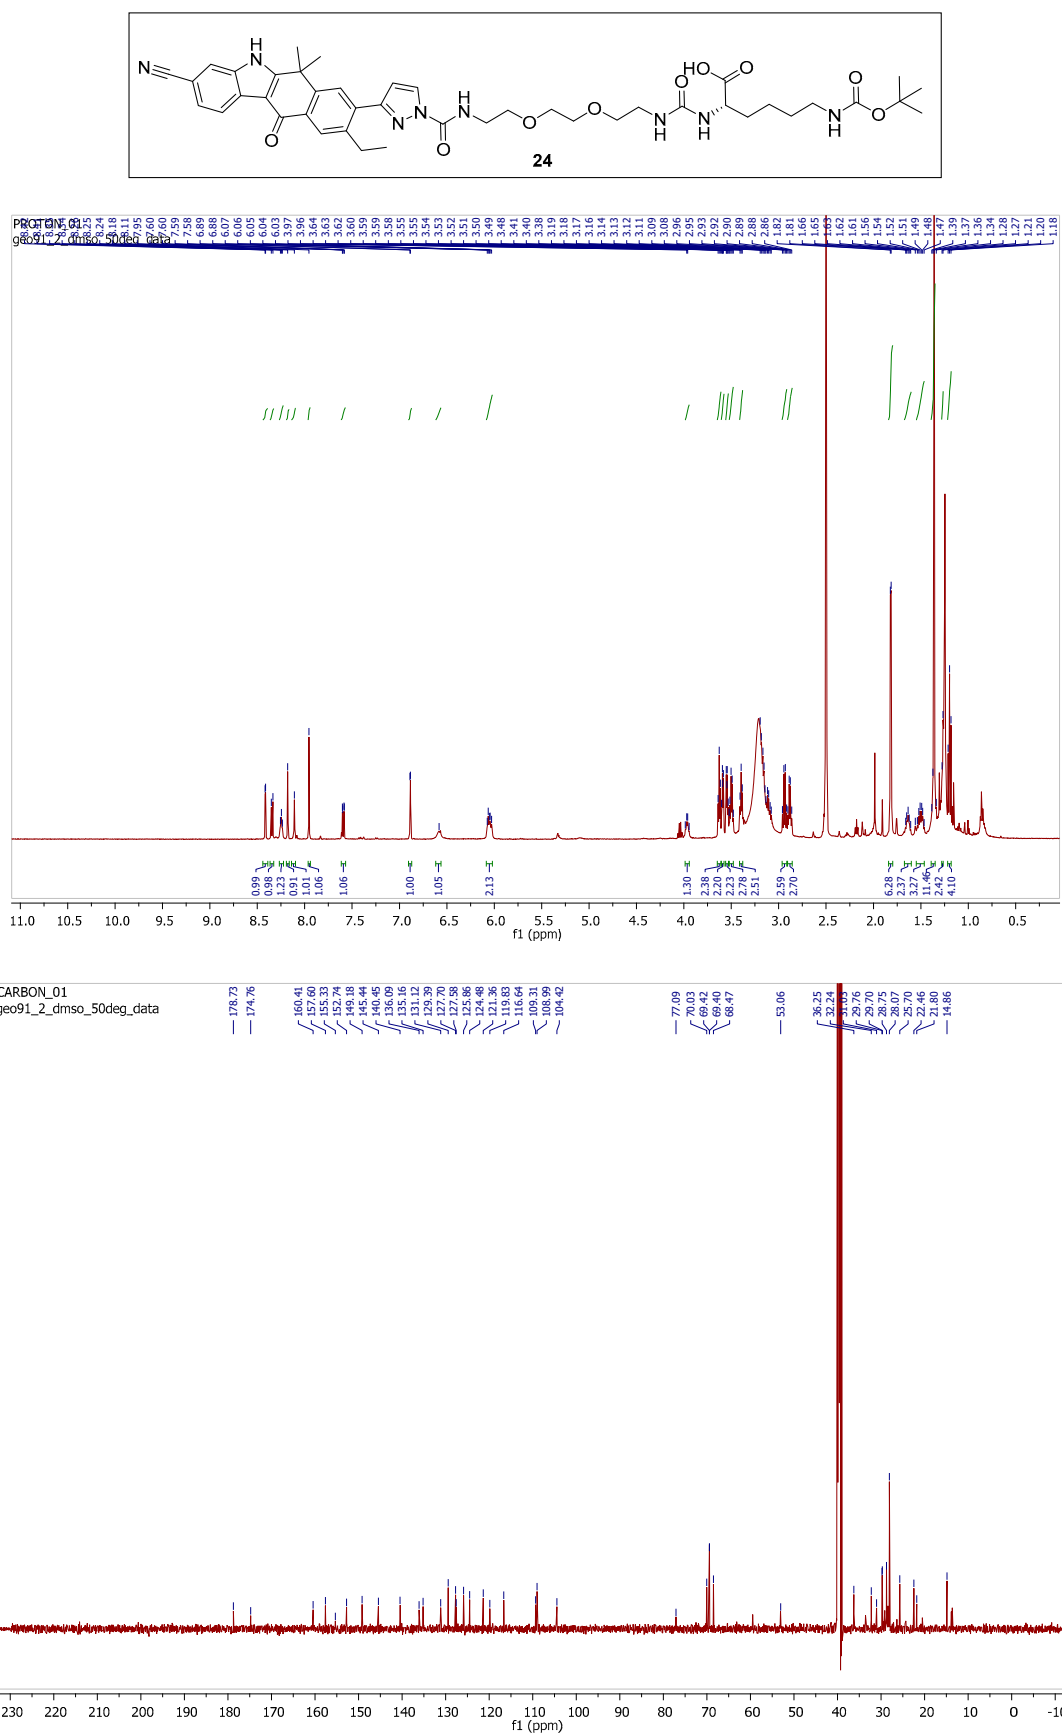

**Figure S45.**  $^1\text{H}$ -NMR and  $^{13}\text{C}$ -NMR spectra for compound **24**.

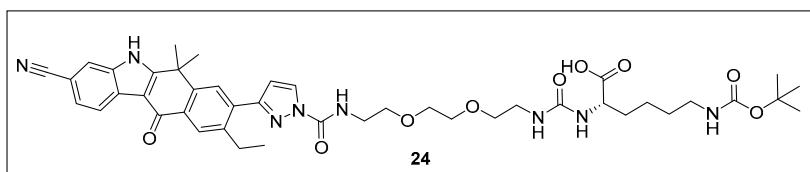

#### Method 1

Retention time: 27.4 m

area: 6702040 (absorbance units x minutes)

total area: 7142814 (absorbance units x minutes)

area %:  $(6702040/7142814) \times 100 = 93.8 \%$

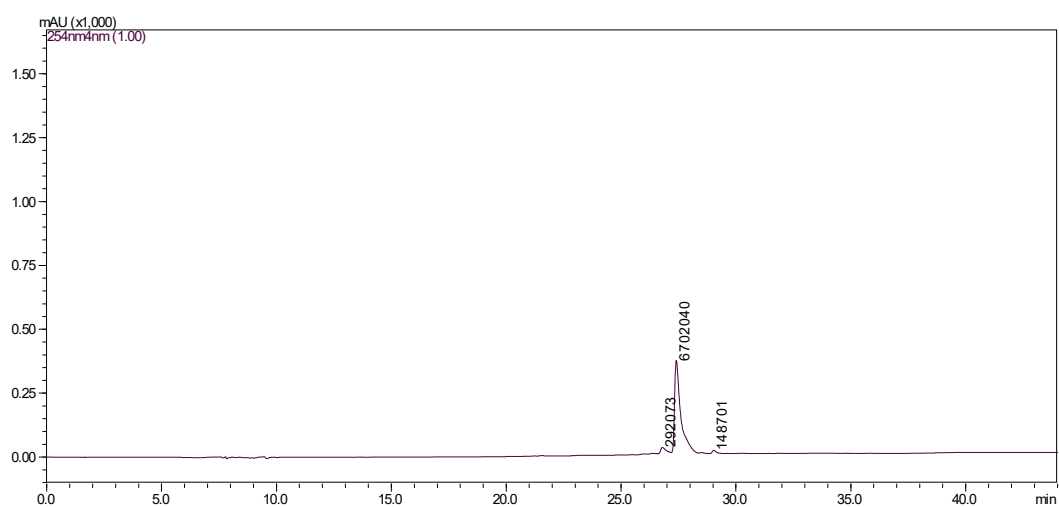

**Figure S46.** ESI-LCMS of compound **24** after column chromatography purification

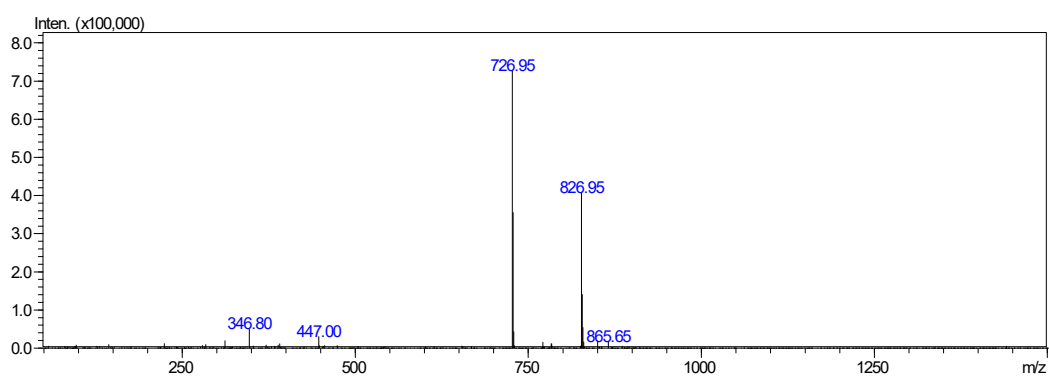

**Figure S47.** ESI-MS for **24**, positive mode:  $m/z$  calcd mass for  $C_{43}H_{55}N_8O_9$   $[M+H]^+ = 827.40$ , was found 826.95

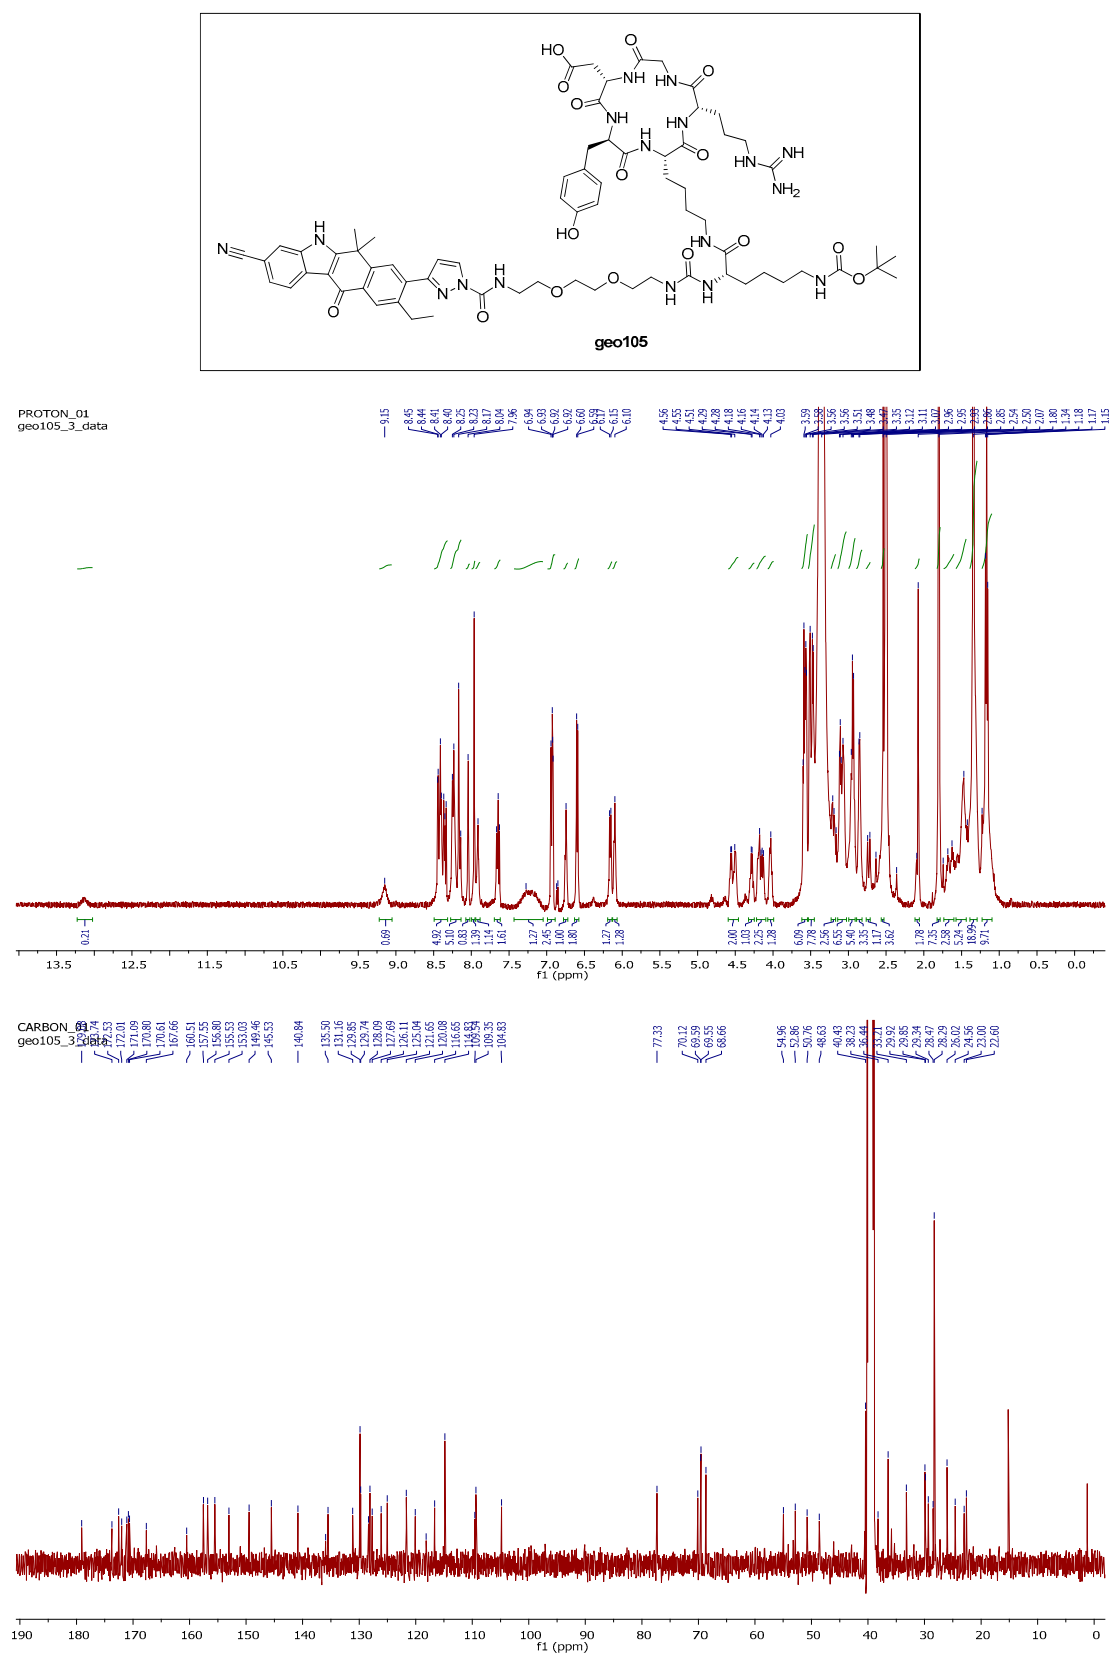

**Figure S48.** <sup>1</sup>H-NMR and <sup>13</sup>C-NMR spectra for compound **geo105**.

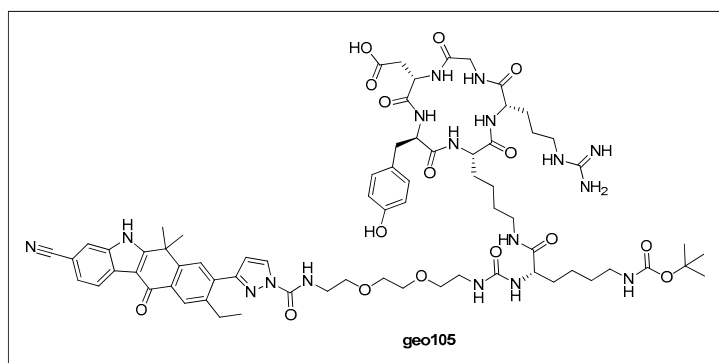

#### Method 1

Retention time: 21.8 m

area: 11056999 (absorbance units x minutes)

total area: 11122330 (absorbance units x minutes)

area %:  $(11056999/11122330) \times 100 = 99.4 \%$

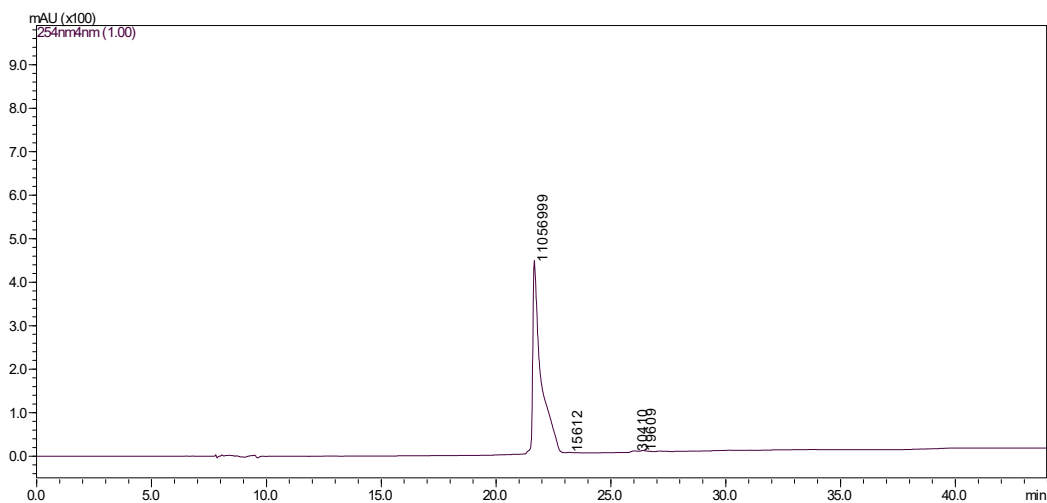

**Figure S49.** ESI-LCMS of compound **geo105** after column chromatography purification

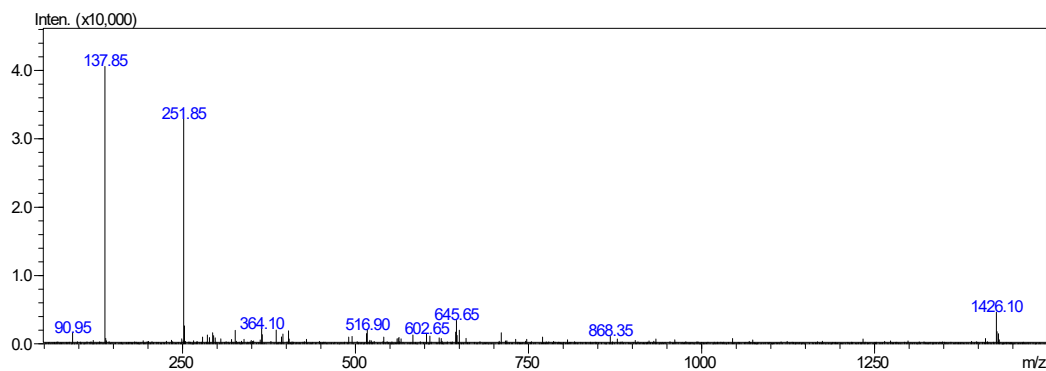

**Figure S50.** ESI-MS for **geo105**, negative mode:  $m/z$  calcd mass for  $C_{70}H_{93}N_{17}O_{16} [M-H]^- = 1426.70$ , was found 1426.10.



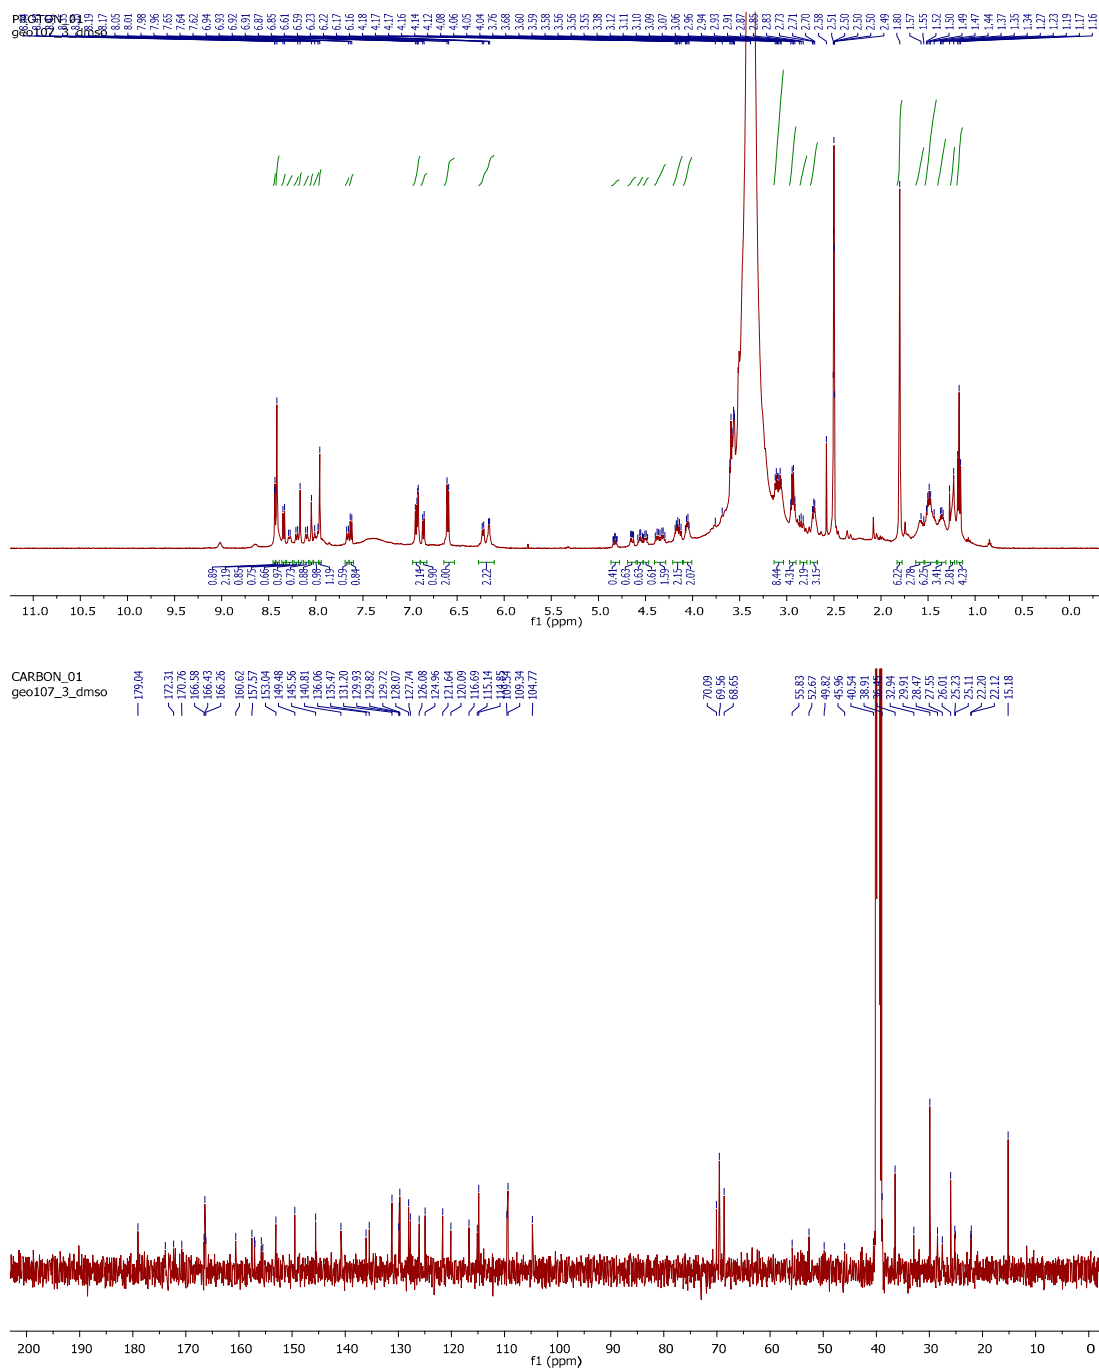

**Figure S51.**  $^1\text{H}$ -NMR and  $^{13}\text{C}$ -NMR spectra for compound **geo107**.

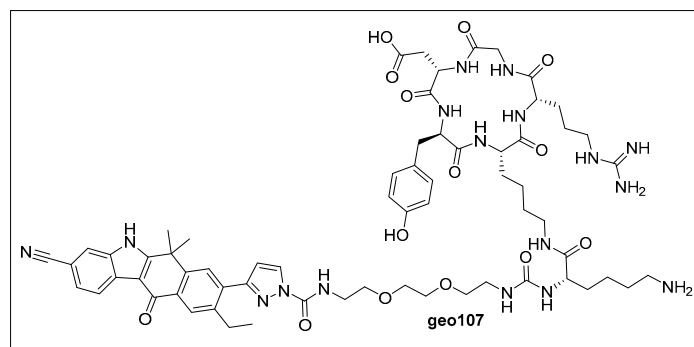

#### Method 1

Retention time: 18.8 m

area: 1819194 (absorbance units x minutes)

total area: 1855459 (absorbance units x minutes)

area %:  $(1819194/1855459) \times 100 = 98.0 \%$

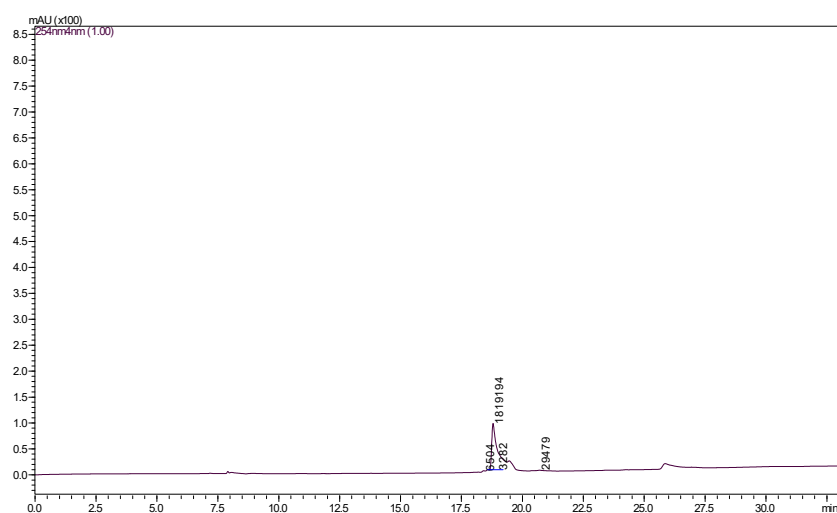

**Figure S52.** ESI-LCMS of compound **geo107** after HPLC purification

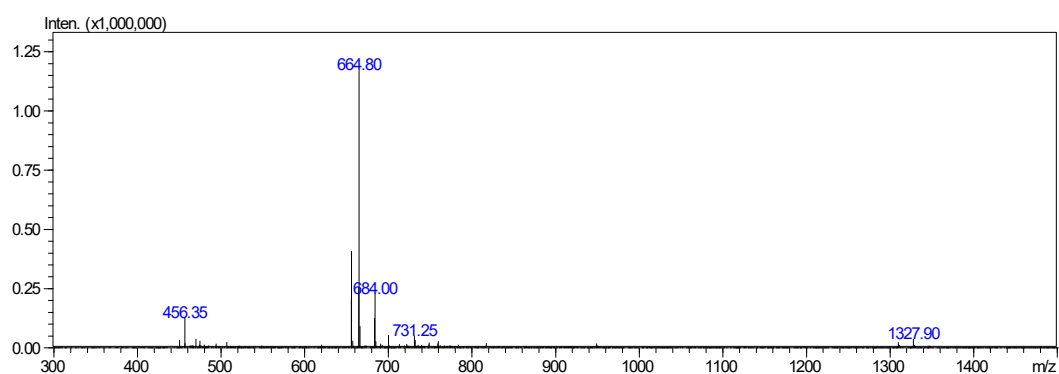

**Figure S53.** ESI-MS for **geo107**, positive mode:  $m/z$  calcd mass for  $C_{65}H_{86}N_{17}O_{14}$   $[M+H]^+ = 1328.65$ , was found 1327.9.

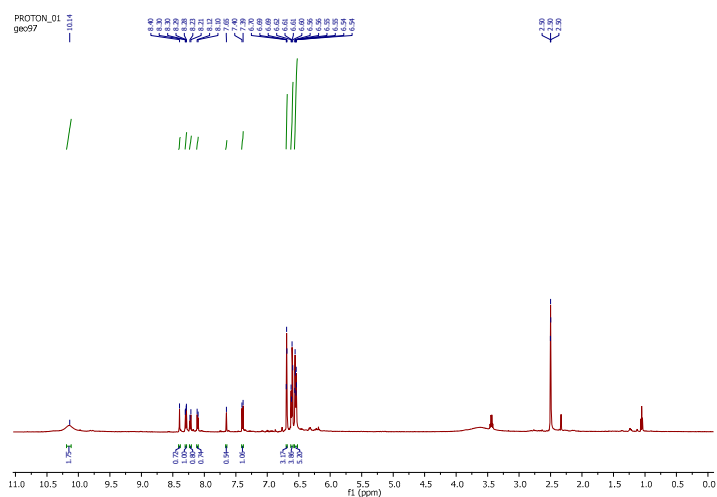

**Figure S54.**  $^1\text{H}$ -NMR spectrum for compound **28**.

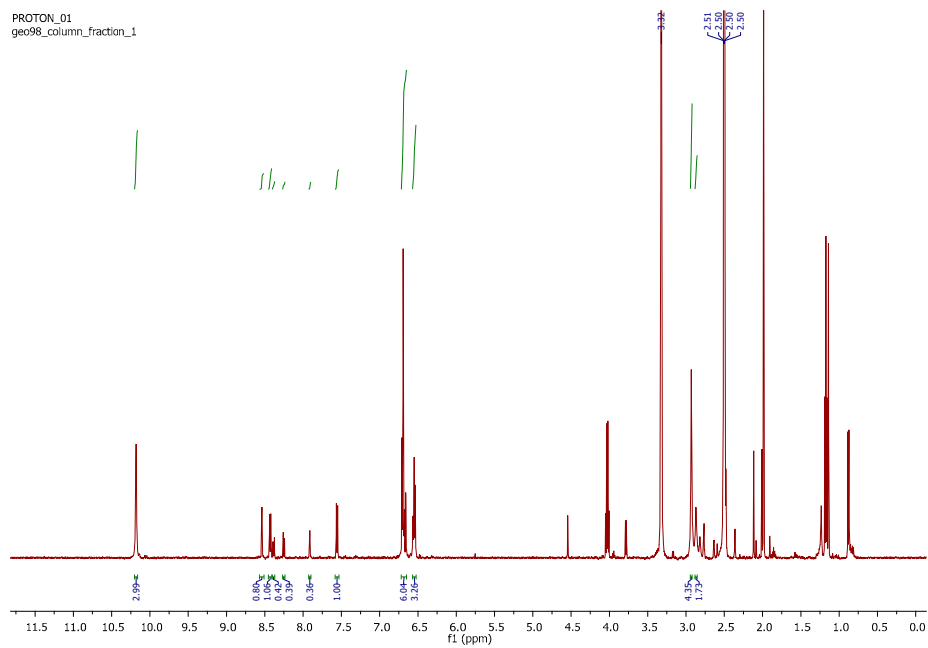

**Figure S55.**  $^1\text{H}$ -NMR spectrum for compound **29**.

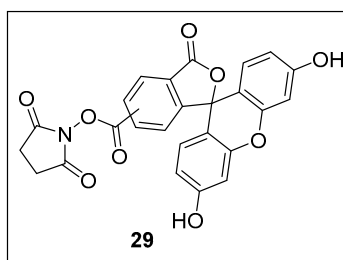

Method 1

Retention time: 22.6 m

area: 19307526 (absorbance units x minutes)

total area: 20715865 (absorbance units x minutes)

area %:  $(19307526/20715865) \times 100 = 93.2 \%$

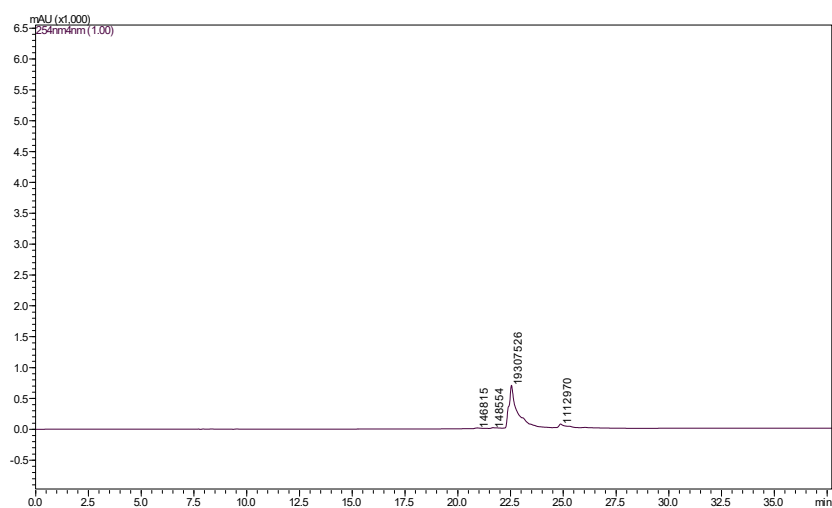

**Figure S56.** ESI-LCMS of compound **29** after column chromatography purification

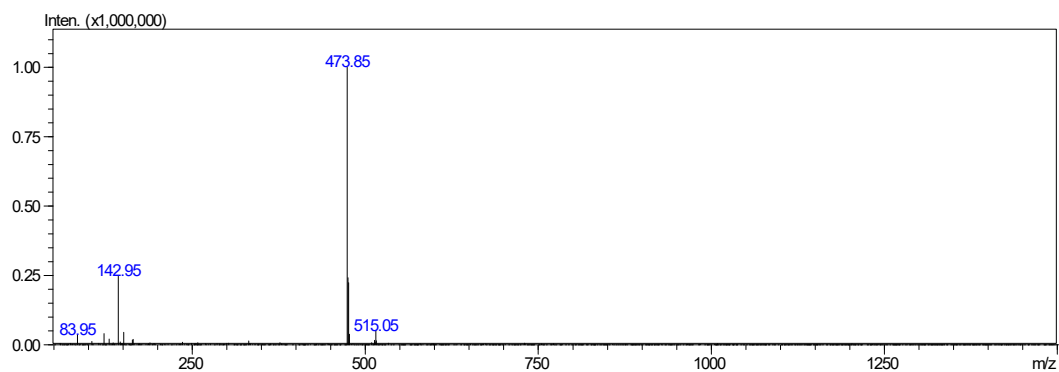

**Figure S57.** ESI-MS for **29**, positive mode:  $m/z$  calcd mass for  $C_{25}H_{15}NO_9$   $[M]^+ = 473.07$ , was found 473.85.

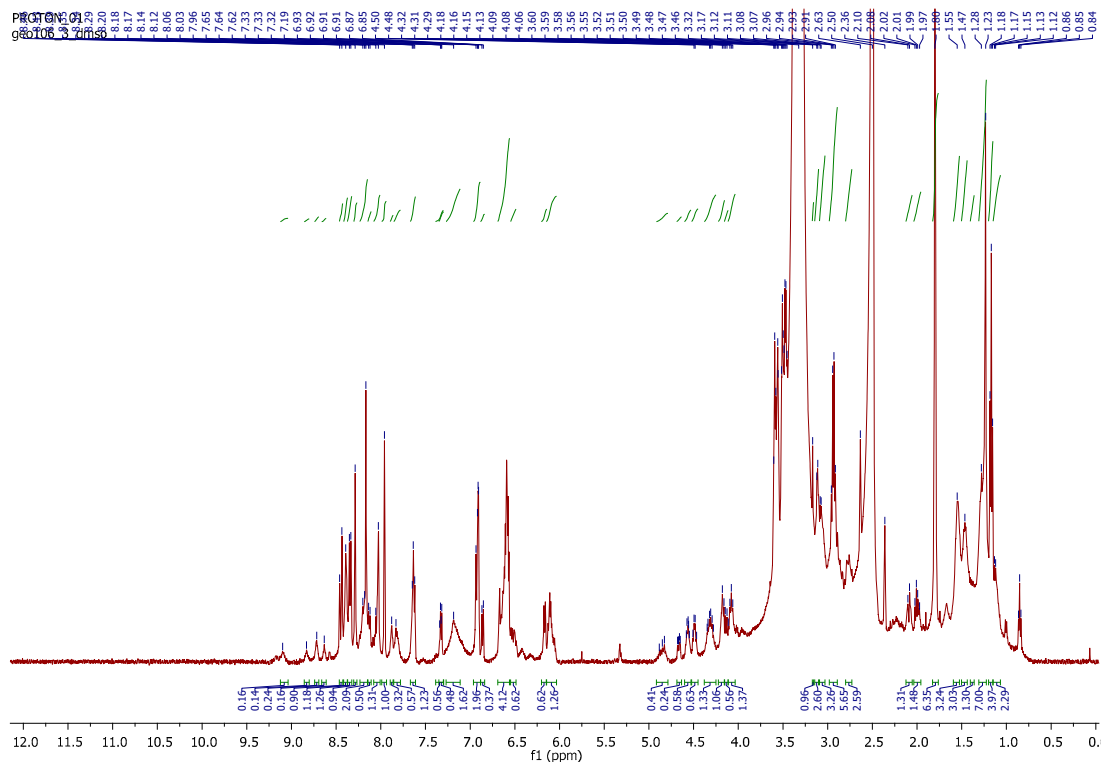

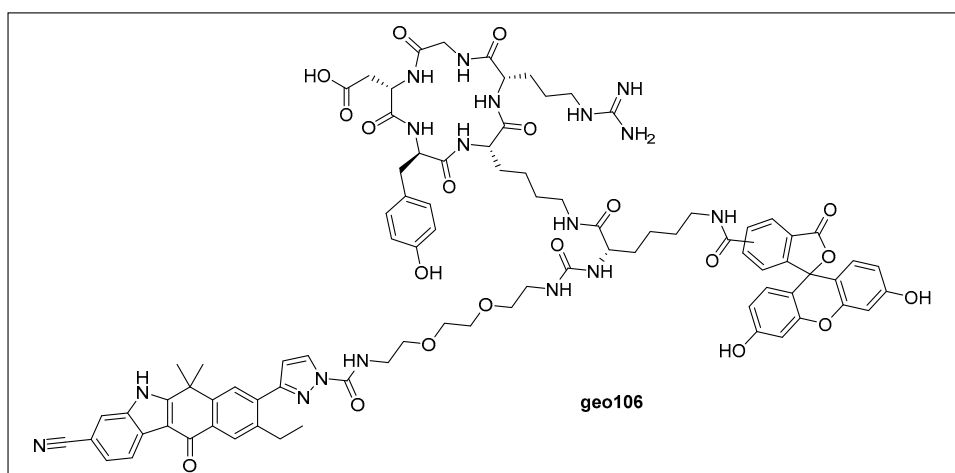

#### Method 5

Retention time: 21.3 m

area: 12951299 (absorbance units x minutes)

total area: 13466339 (absorbance units x minutes)

area %:  $(12951299/13466339) \times 100 = 96.1 \%$

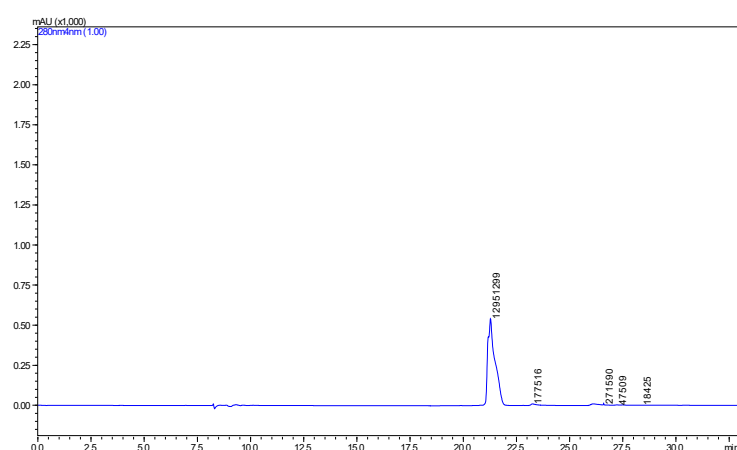

**Figure S59.** ESI-LCMS of compound **geo106** after HPLC purification

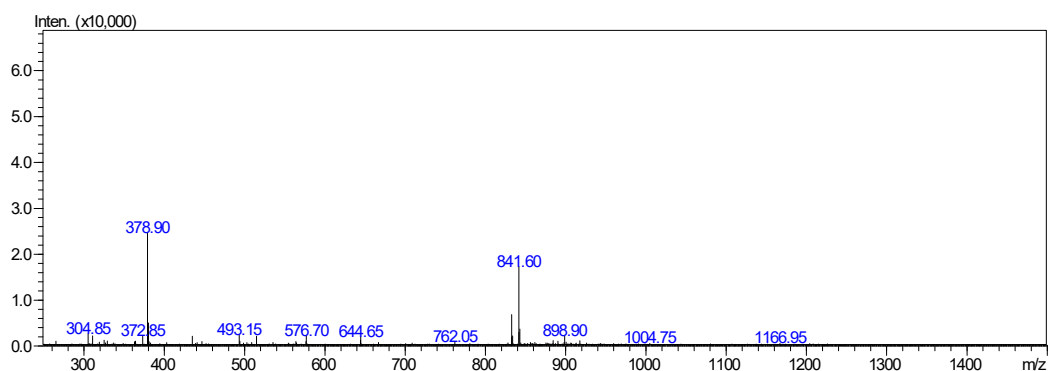

**Figure S60.** ESI-MS for **geo106**, negative mode:  $m/z$  calcd mass for  $C_{86}H_{95}N_{17}O_{20}$   $[M/2-H]^- = 841.84$ , was found 841.60.

## Chemostability Studies

### Compound **geo75**

➤ pH = 5.2, method 4

t = 0

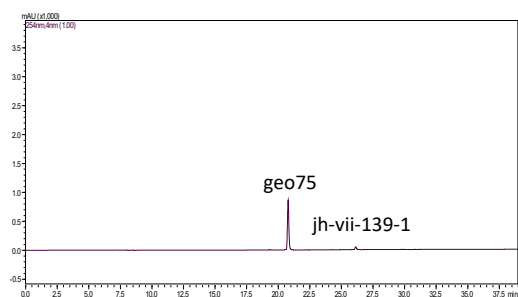

t = 5 h

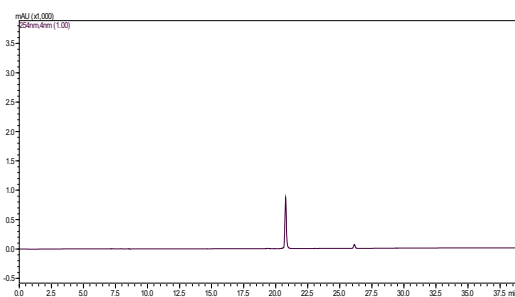

t = 24 h

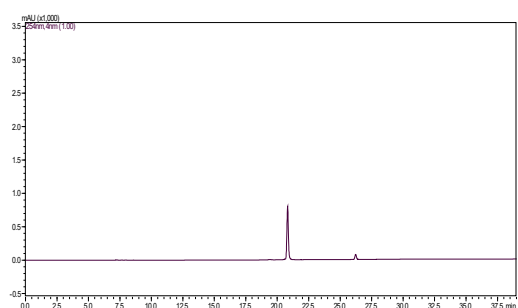

t = 48 h

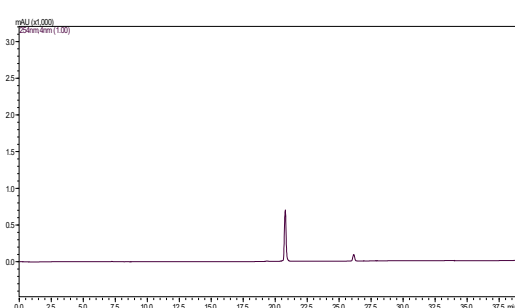

**Figure S61.** Stability of compound **geo75** at pH=5.2.

➤ pH = 7.4, method 4

t = 0

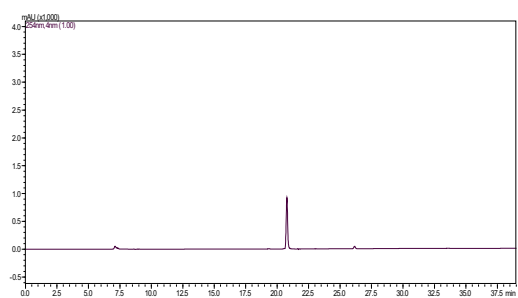

t = 5 h

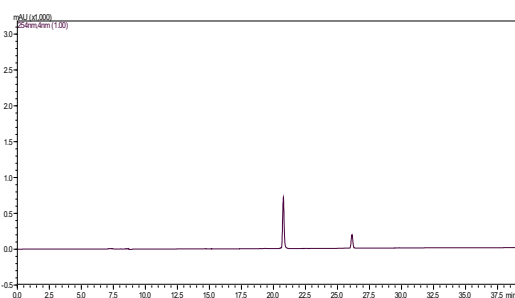

t = 24 h

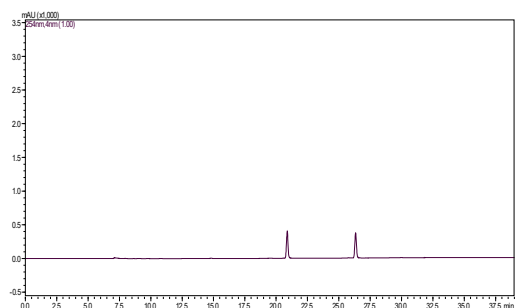

t = 48 h

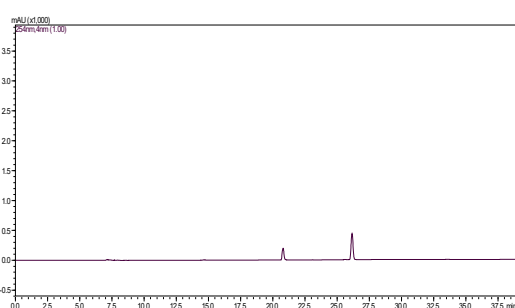

**Figure S62.** Stability of compound **geo75** at pH=7.4.

➤ DMEM, method 4

t = 0

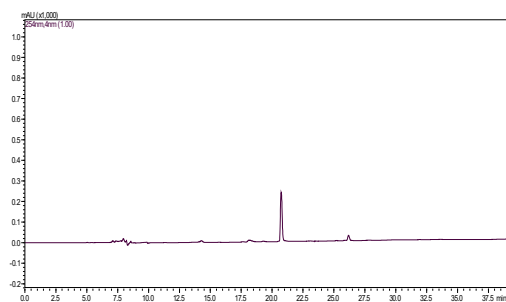

t = 3 h

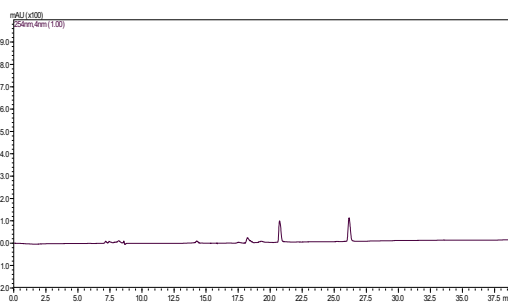

t = 6 h

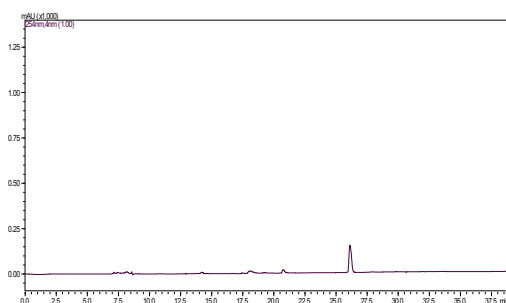

t = 9 h

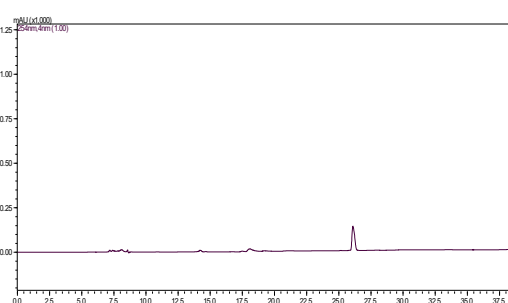

**Figure S63.** Stability of compound **geo75** in DMEM.

➤ Human Plasma, method 2

t = 0 h

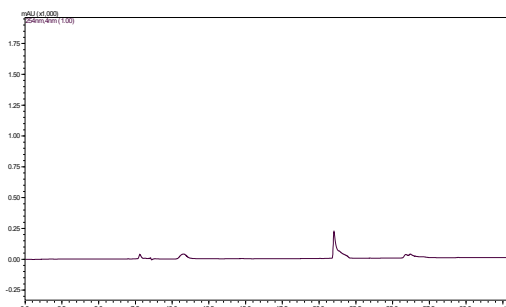

t = 1 h

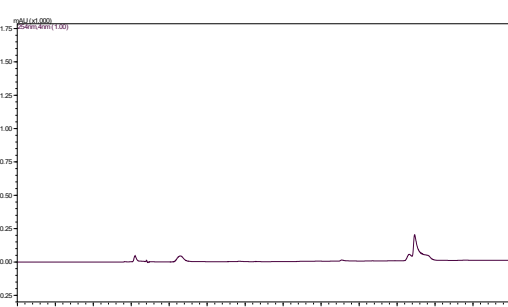

t = 2 h

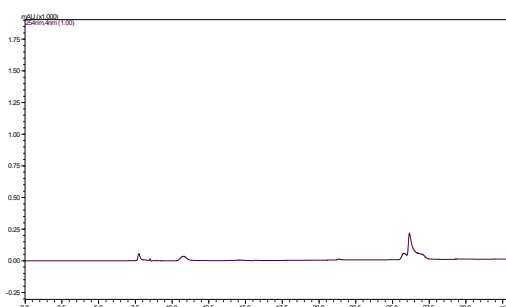

t = 24 h

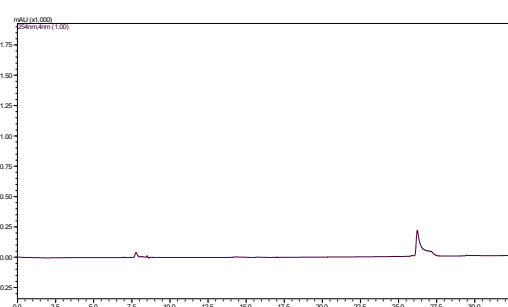

**Figure S64.** Stability of compound **geo75** in human plasma.



## Compound **geo77**

➤ pH = 5.2, method 2

t = 0 h

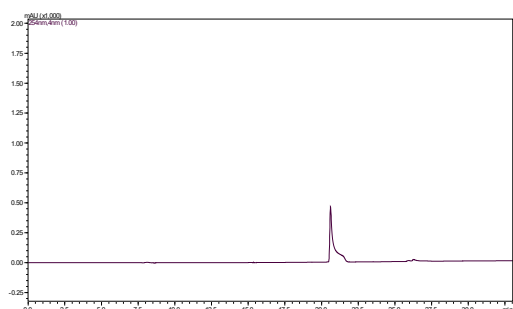

t = 5 h

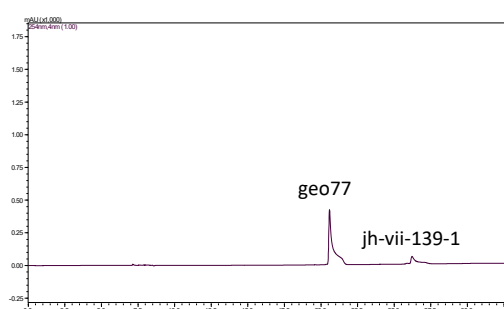

t = 24 h

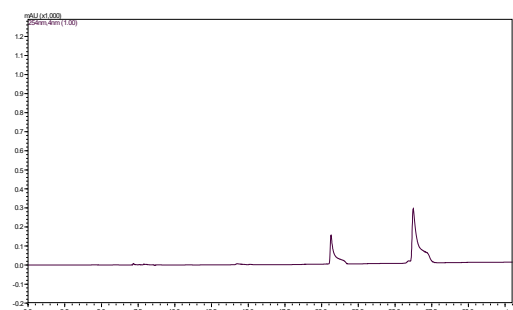

t = 48 h

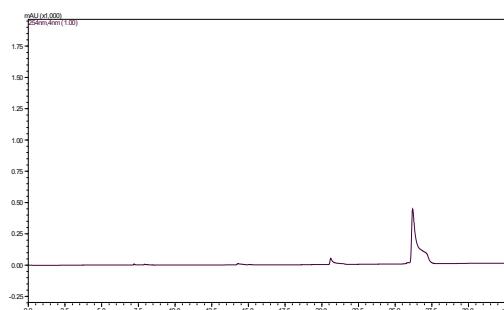

**Figure S65.** Stability of compound **geo77** at pH=5.2.

➤ pH = 7.4, method 2

t = 0 h

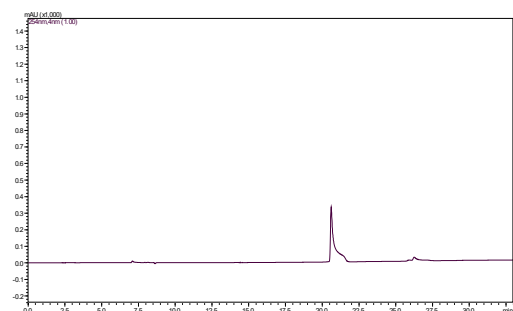

t = 2 h

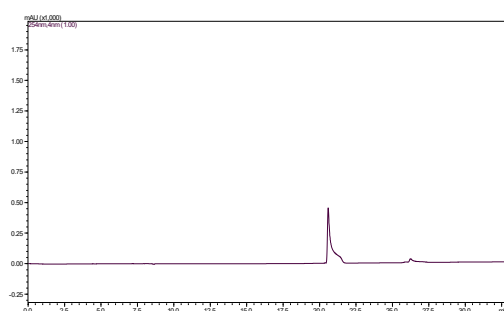

t = 5 h

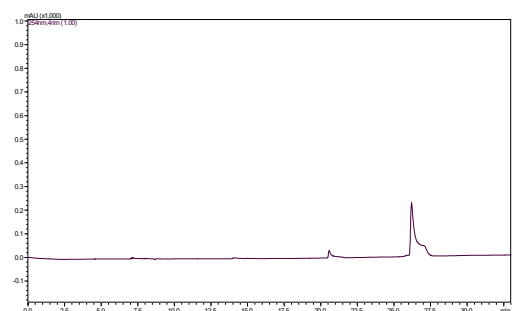

t = 24 h

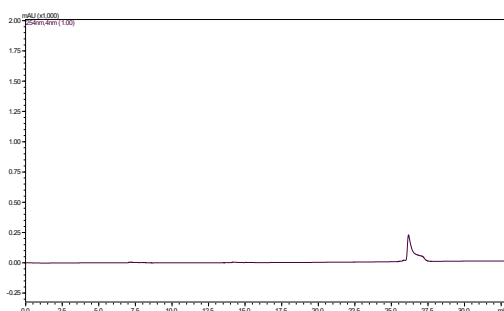

**Figure S66.** Stability of compound **geo77** at pH=7.4.

➤ DMEM, method 4

t = 0 h

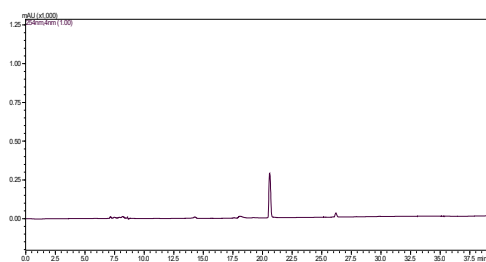

t = 1.5 h

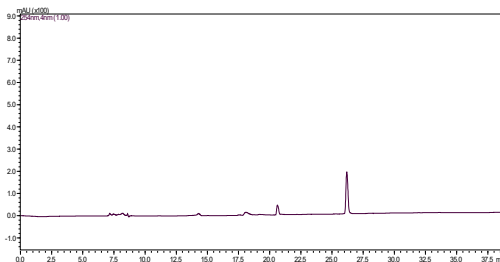

t = 3 h

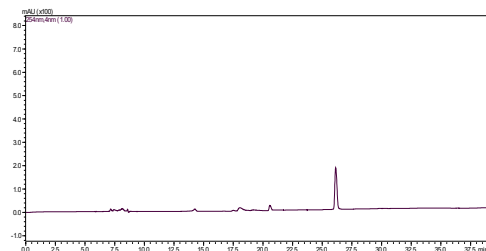

t = 7.5 h

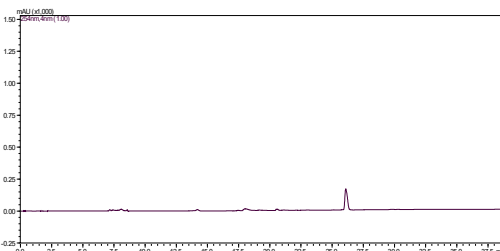

**Figure S67.** Stability of compound **geo77** in DMEM.

➤ Human Plasma, method 2

t = 0 h

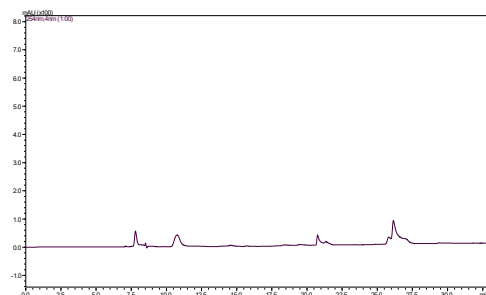

t = 1 h

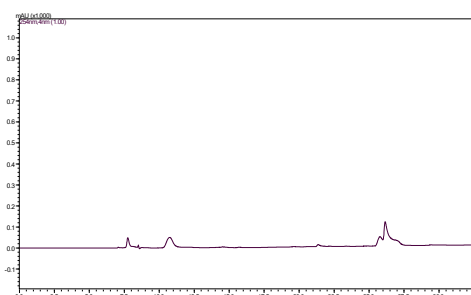

t = 2 h

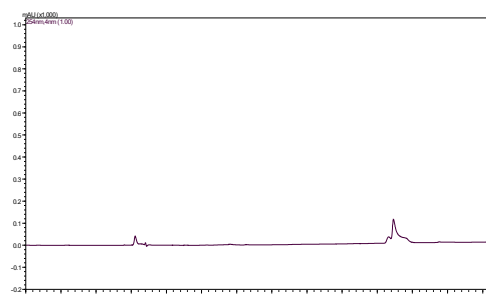

t = 24 h

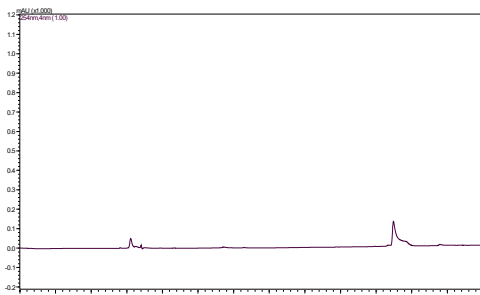

**Figure S68.** Stability of compound **geo77** in human plasma.

## Compound **geo85**

➤ pH = 5.2, method 2

t = 0 h

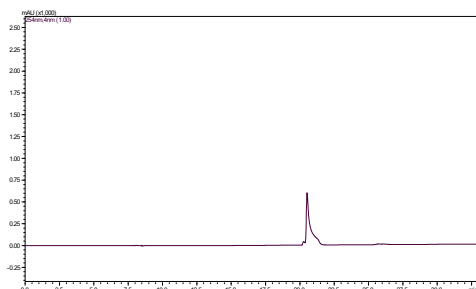

t = 3 h

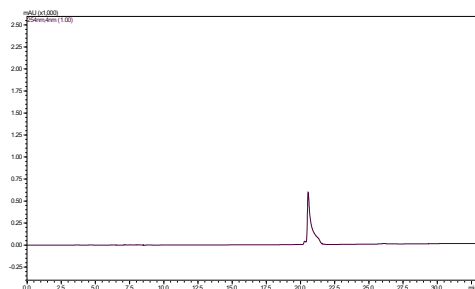

t = 5 h

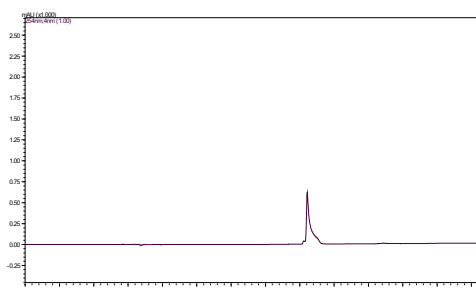

t = 48 h

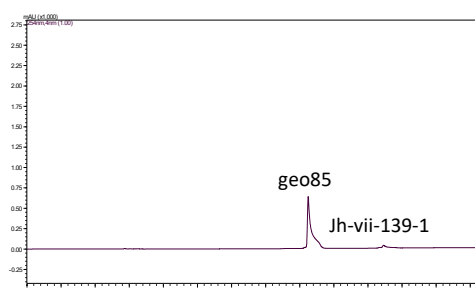

**Figure S69.** Stability of compound **geo85** at pH=5.2.

➤ pH = 7.4, method 2

t = 0 h

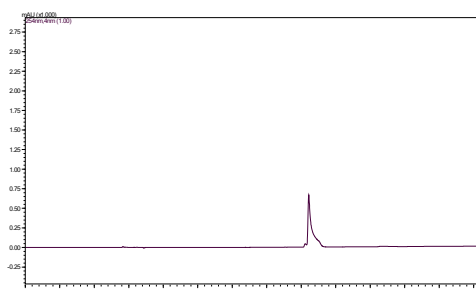

t = 3 h

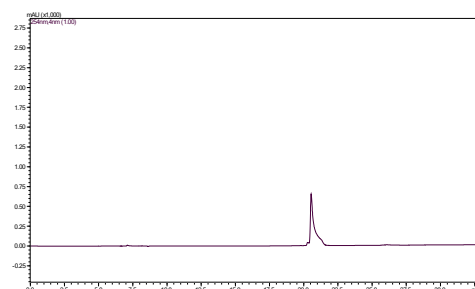

t = 5 h

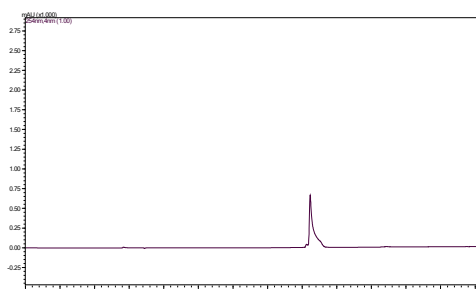

t = 48 h

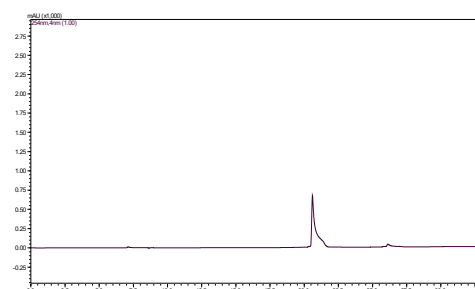

**Figure S70.** Stability of compound **geo85** at pH=7.4.

➤ DMEM, method 2

t = 0 h

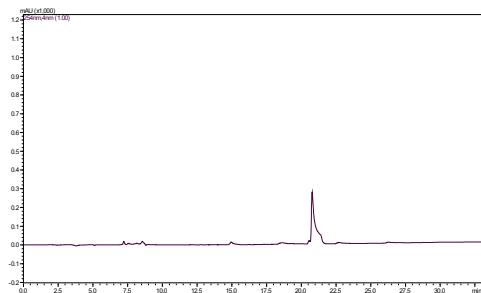

t = 3 h

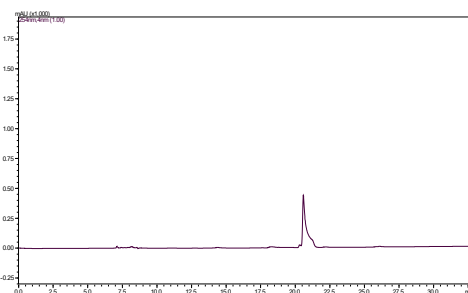

t = 24 h

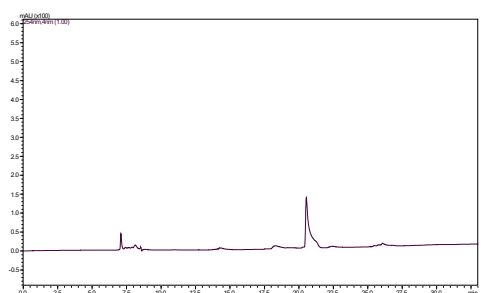

t = 48 h

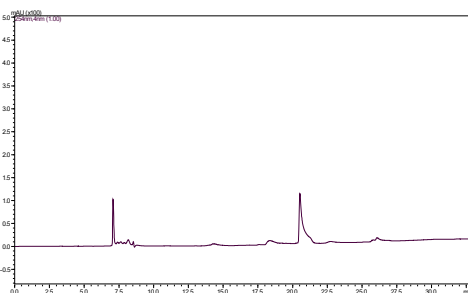

**Figure S71.** Stability of compound **geo85** in DMEM.

➤ Human Plasma, method 1

t = 0 h

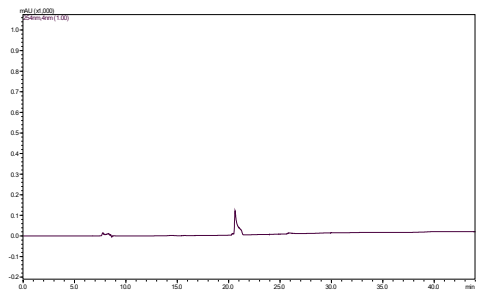

t = 3 h

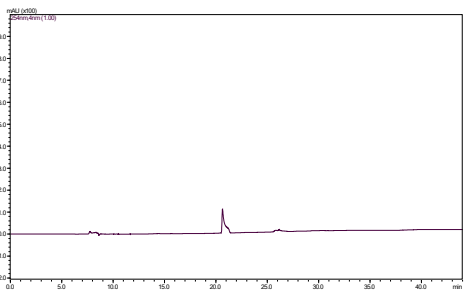

t = 5 h

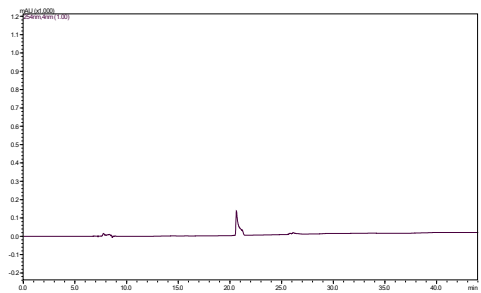

t = 48 h

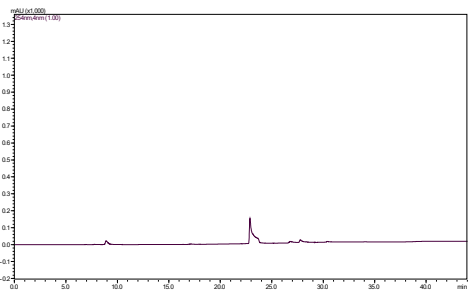

**Figure S72.** Stability of compound **geo85** in human plasma.

### Compound **geo107**

➤ pH = 5.2, method 2

t = 0 h

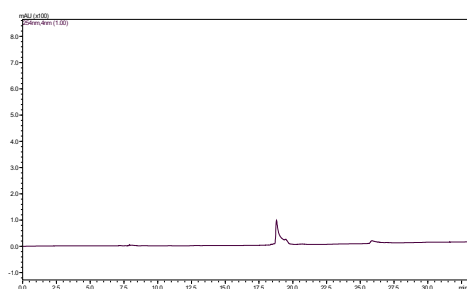

t = 3 h

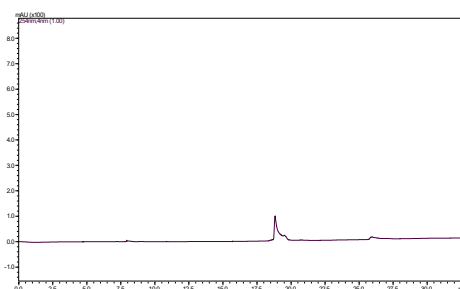

t = 5 h

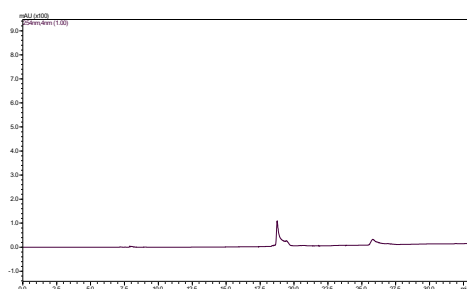

t = 24 h

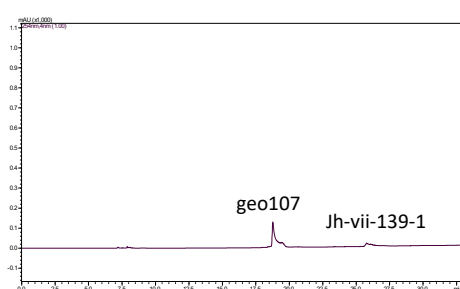

**Figure S73.** Stability of compound **geo107** at pH=5.2.

### Compound **geo107**

➤ pH = 7.4, method 2

t = 0 h

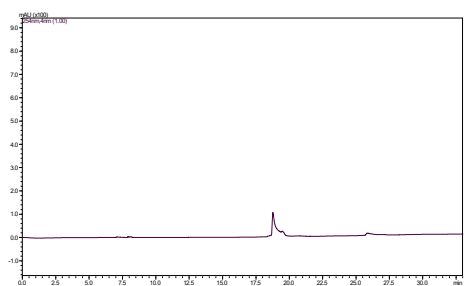

t = 3 h

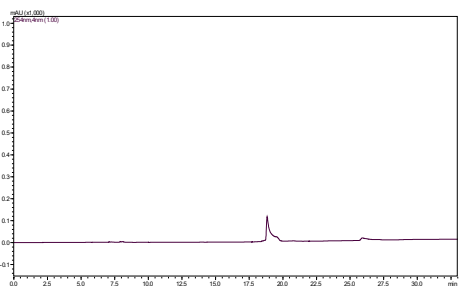

t = 5 h

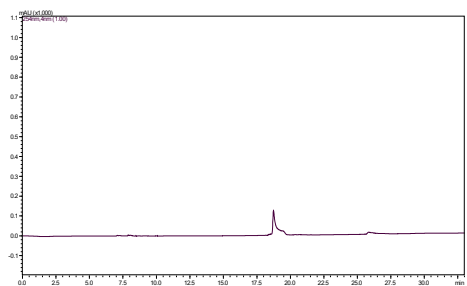

t = 24 h

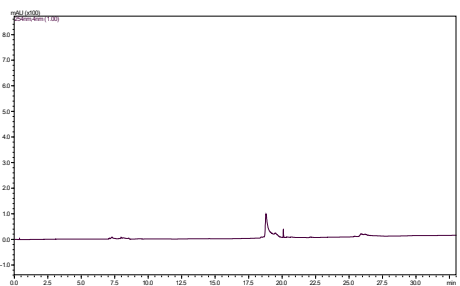

**Figure S74.** Stability of compound **geo107** at pH=7.4.

## Compound **geo107**

➤ DMEM, method 2

t = 0 h

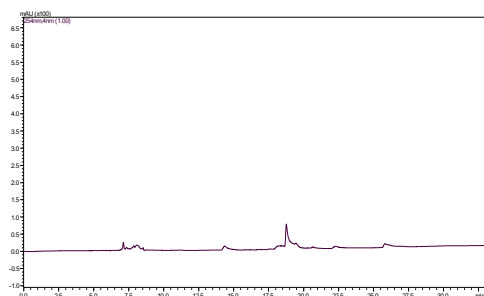

t = 2 h

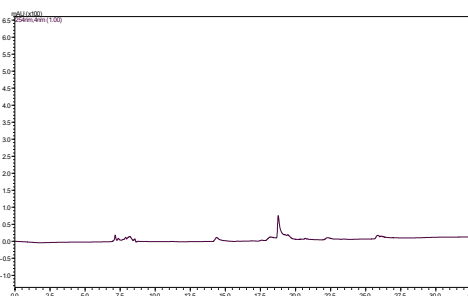

t = 5 h

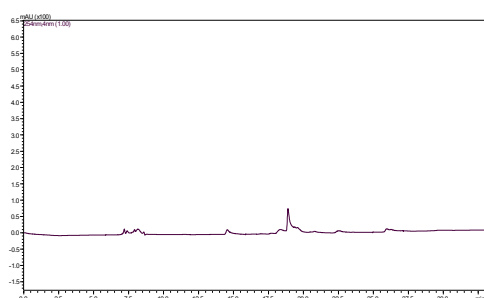

t = 48 h

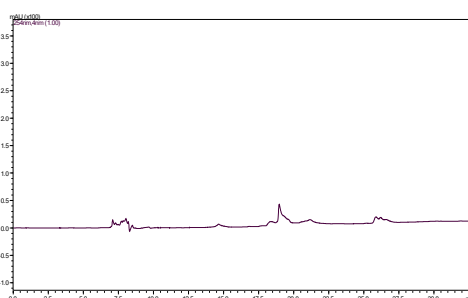

**Figure S75.** Stability of compound **geo107** in DMEM.

## Compound **geo107**

➤ Human Plasma, method 2

t = 0 h

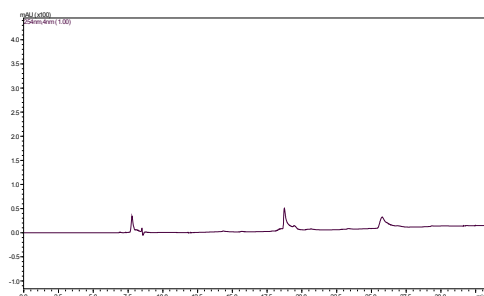

t = 2 h

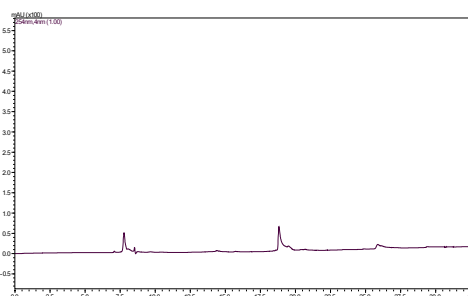

t = 5 h

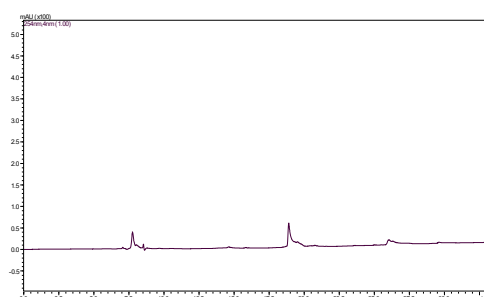

t = 48 h

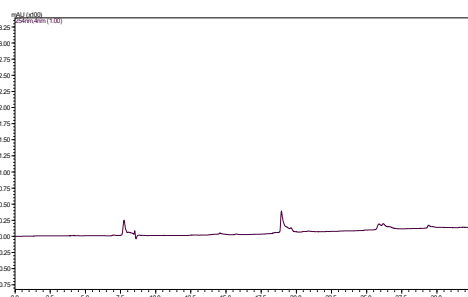

**Figure S76.** Stability of compound **geo107** in human plasma.

## Compound JH-VII-139-1

➤ DMEM, method 1

t = 0 h

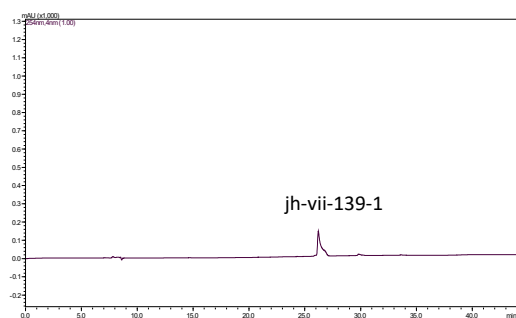

t = 2 h

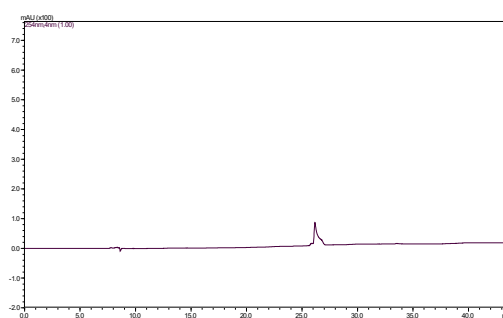

t = 24 h

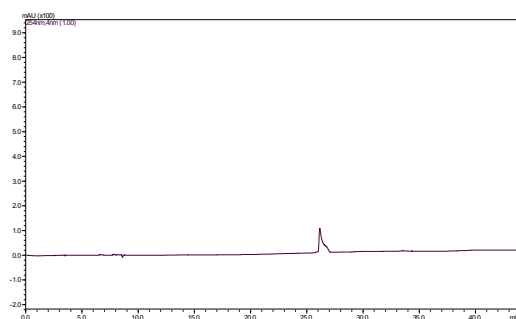

t = 48 h

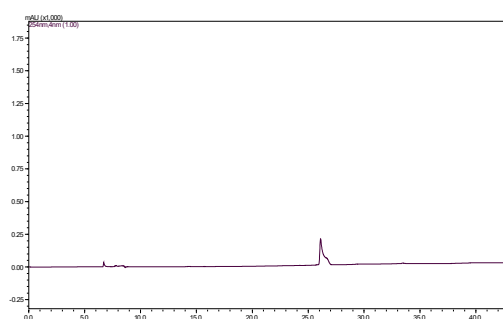

**Figure S77.** Stability of compound JH-VII-139-1 in DMEM.

➤ Human Plasma, method 2

t = 0 h

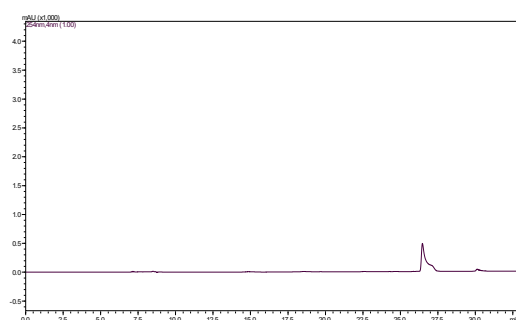

t = 3 h

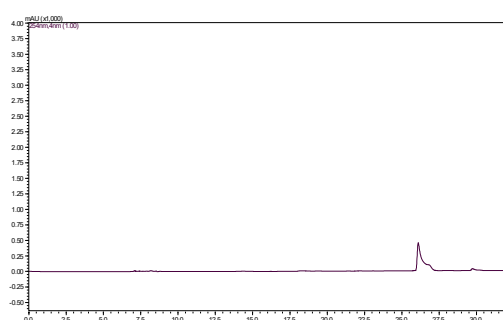

t = 5 h

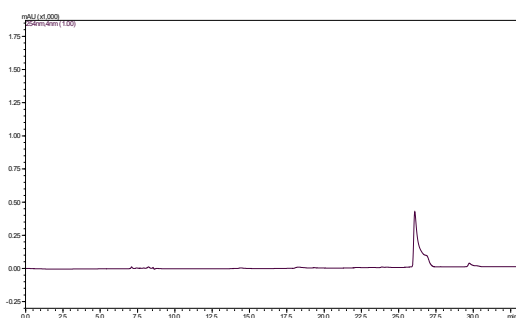

t = 48 h

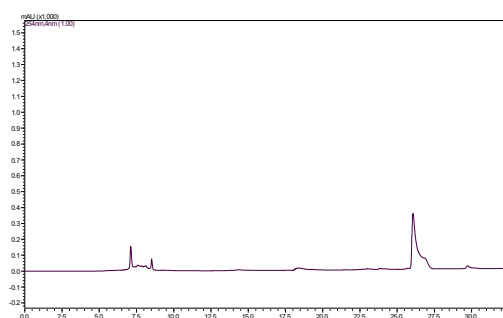

**Figure S78.** Stability of compound JH-VII-139-1 in human plasma.

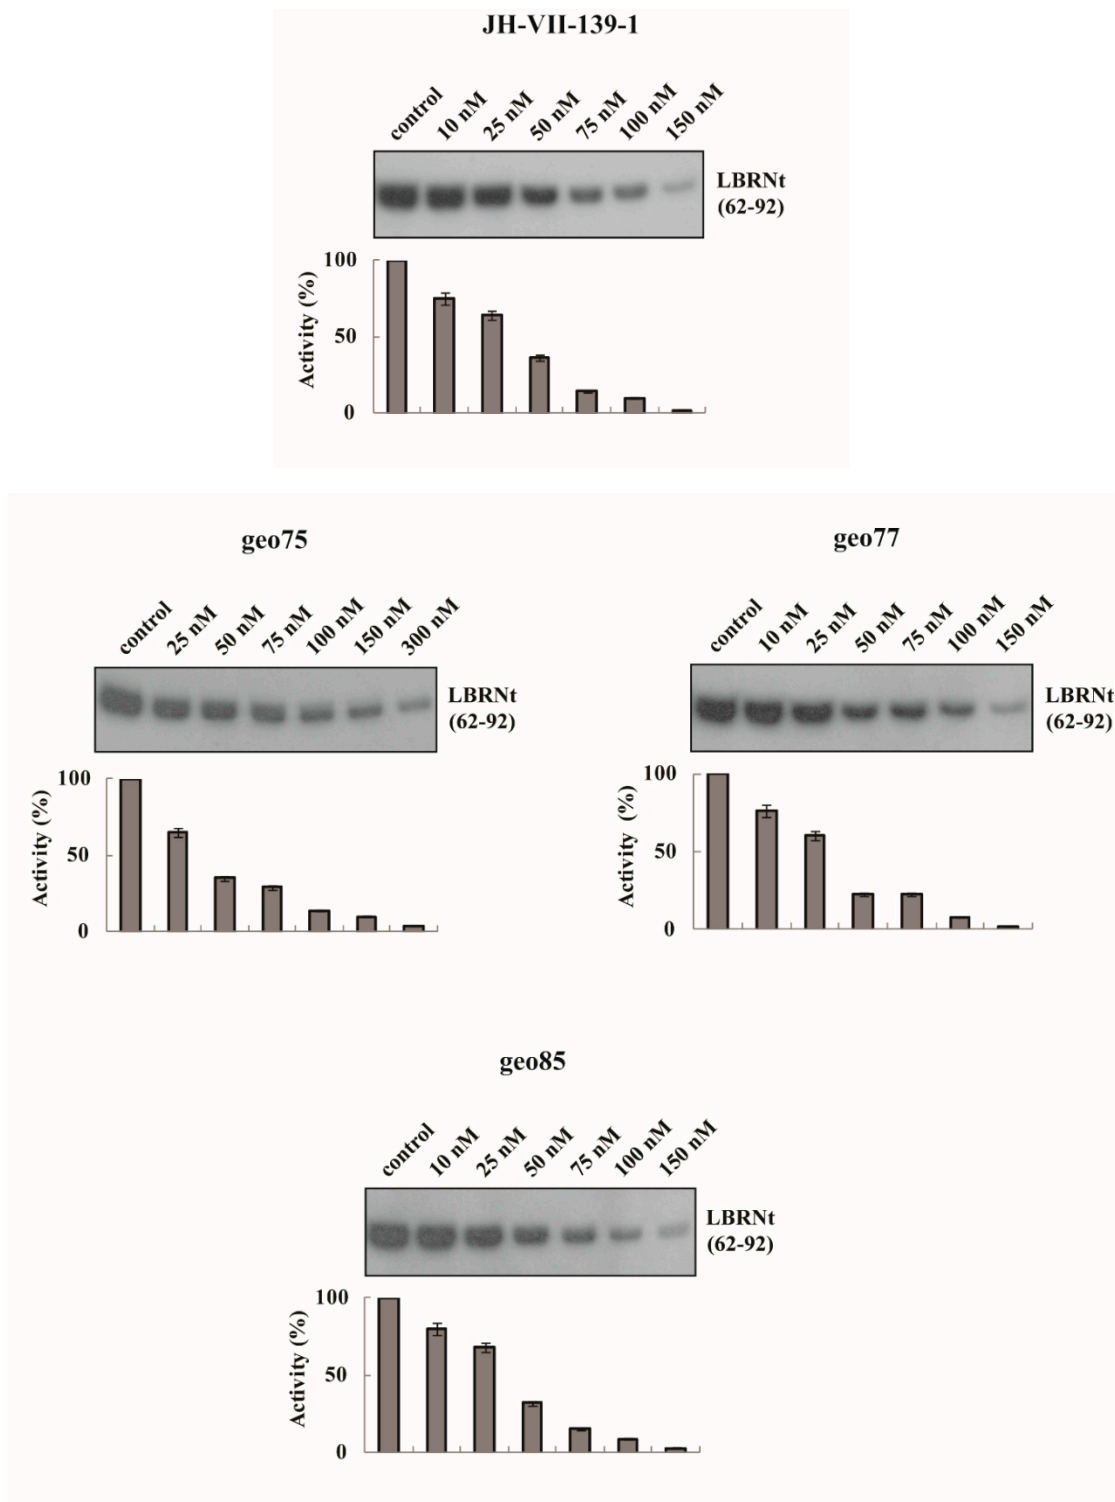

**Figure S79.** In vitro phosphorylation of GST-LBRNt(62-92) by GST-SRPK1 in the presence of increasing concentrations (10-300 nM) of JH-VII-139-1, **geo75**, **geo77** and **geo85** respectively. Phosphorylated bands were excised from the dry gel and Cherenkof counted.
